# Supplementary material for: Characterizing spatial gene expression heterogeneity in spatially resolved single-cell transcriptomic data with nonuniform cellular densities
Source: Genome Res. 2021 Oct;31(10):1843–55. doi: 10.1101/gr.271288.120 (PMC8494224; doi:10.1101/gr.271288.120)
Supplement: Supplemental Material [file supp_gr.271288.120_Supplemental_Table_S1.xlsx]

## Sheet: 2supp_table_1
# Supplemental Table S1. MERINGUE results for spatial transcriptomics data of the mouse olfactory bulb.
	I	Adjusted P-value	Percent Driving	Pattern
Hpcal4	0.359316	0	0.261538	1
Calm2	0.371862	0	0.257692	1
Ncdn	0.449259	0	0.257692	1
Nrxn3	0.343724	0	0.253846	1
Grb2	0.341132	0	0.234615	1
Nsg2	0.35962	0	0.234615	1
Gpsm1	0.48338	0	0.230769	1
Pcp4	0.451415	0	0.226923	1
Psd	0.35748	0	0.223077	1
Sez6	0.446802	0	0.223077	1
Camk2b	0.381448	0	0.219231	1
Gng4	0.418893	0	0.219231	1
Vamp2	0.375289	0	0.219231	1
Grin1	0.35309	0	0.215385	1
Syn1	0.34669	0	0.215385	1
Atp1a1	0.348881	0	0.207692	1
Snap25	0.310898	0	0.207692	1
Cpne4	0.354617	0	0.203846	1
Baiap2	0.387381	0	0.2	1
Ctxn1	0.323343	0	0.2	1
Meis2	0.326625	0	0.2	1
Ndrg4	0.318888	0	0.2	1
Gprin1	0.338001	0	0.188462	1
Dynll1	0.325934	0	0.184615	1
Kcnh3	0.396576	0	0.180769	1
Penk	0.363931	0	0.173077	1
Rbfox3	0.335312	0	0.173077	1
Nrgn	0.483131	0	0.161538	1
Mbp	0.43361	0	0.146154	1
Tubb2b	0.386501	0	0.142308	1
Nrep	0.306482	0	0.138462	1
Necab2	0.331067	0	0.111538	1
Atp1b1	0.306225	8.60715e-15	0.2	1
Synpr	0.303464	8.60715e-15	0.184615	1
Ppia	0.295599	4.0884e-14	0.169231	1
Eif1	0.290104	1.32386e-13	0.188462	1
Mapk1	0.288531	1.81707e-13	0.211538	1
Abl2	0.288033	1.81707e-13	0.184615	1
Ube2ql1	0.287081	2.25049e-13	0.165385	1
Ablim3	0.282708	4.71455e-13	0.161538	1
Dlgap1	0.280539	9.03751e-13	0.180769	1
Aplp1	0.278142	1.3628e-12	0.161538	1
Icam5	0.277846	1.37897e-12	0.153846	1
Arf3	0.276516	1.92594e-12	0.192308	1
Tyro3	0.274062	2.81202e-12	0.115385	1
Tshz1	0.273958	3.13883e-12	0.184615	1
Psd3	0.270851	5.73024e-12	0.173077	1
Kcnj4	0.270421	6.38691e-12	0.173077	1
Limd2	0.267636	1.01544e-11	0.15	1
Rragd	0.266219	1.41584e-11	0.161538	1
Fkbp1a	0.264592	1.93231e-11	0.176923	1
Gm13889	0.264264	1.93231e-11	0.130769	1
Gda	0.259845	4.13106e-11	0.142308	1
Agap2	0.26037	4.22075e-11	0.184615	1
Pbx1	0.259786	4.29515e-11	0.188462	1
Camk2n1	0.258218	6.31759e-11	0.192308	1
Pcp4l1	0.257257	7.20479e-11	0.180769	1
Camk2a	0.256021	9.21976e-11	0.176923	1
Nat8l	0.253078	1.54894e-10	0.165385	1
Bai2	0.245654	5.2968e-10	0.138462	1
Prkca	0.24451	7.1635e-10	0.146154	1
Eno2	0.243211	9.08874e-10	0.153846	1
Ppm1e	0.240852	1.3081e-09	0.196154	1
Sh3gl2	0.239738	1.67238e-09	0.153846	1
Gabra5	0.23911	1.67238e-09	0.146154	1
Gad1	0.235744	3.09515e-09	0.173077	1
C1qtnf4	0.235187	3.36421e-09	0.138462	1
Grasp	0.234456	3.36421e-09	0.111538	1
2010300C02Rik	0.231869	5.48174e-09	0.146154	1
Eef1a1	0.232336	5.48174e-09	0.142308	1
Fam163b	0.224476	1.94875e-08	0.176923	1
Purb	0.223614	2.13498e-08	0.142308	1
Stxbp1	0.222951	2.50106e-08	0.176923	1
Egr1	0.2223	2.59721e-08	0.134615	1
Ywhaz	0.221812	3.04485e-08	0.153846	1
Hspa8	0.21924	4.56694e-08	0.142308	1
Camk4	0.215367	7.30379e-08	0.1	1
Nrxn2	0.210177	1.6853e-07	0.165385	1
Dclk1	0.207576	2.61961e-07	0.142308	1
H3f3a	0.206309	2.66955e-07	0.123077	1
Sox11	0.200791	3.27487e-07	0.0538462	1
Scamp1	0.20607	3.30273e-07	0.157692	1
Bex2	0.205292	3.56886e-07	0.138462	1
Pnmal2	0.204666	4.08503e-07	0.157692	1
Sp9	0.20276	5.00118e-07	0.153846	1
Map2k1	0.200105	7.49414e-07	0.130769	1
Gm1821	0.200175	7.54788e-07	0.146154	1
Dcx	0.198241	9.00039e-07	0.0961538	1
Inpp5j	0.198186	9.88743e-07	0.138462	1
Rprml	0.195602	1.41311e-06	0.142308	1
Map2	0.19406	1.49675e-06	0.130769	1
Dync1i1	0.194397	1.69302e-06	0.173077	1
Lamp5	0.191789	2.16054e-06	0.130769	1
Fam131b	0.192136	2.18328e-06	0.111538	1
Kcnd2	0.191208	2.57307e-06	0.157692	1
Mef2c	0.190235	2.84232e-06	0.126923	1
Kalrn	0.189996	2.97109e-06	0.15	1
Arhgap33	0.184796	6.09881e-06	0.119231	1
Aldoa	0.18439	6.37667e-06	0.142308	1
Snn	0.182837	7.17736e-06	0.107692	1
Ypel5	0.18286	7.27145e-06	0.103846	1
Add2	0.181496	9.16032e-06	0.130769	1
Dpf1	0.179491	1.14475e-05	0.115385	1
Rgs12	0.179467	1.17491e-05	0.119231	1
Bcl11b	0.178868	1.27236e-05	0.103846	1
Spock3	0.178102	1.39358e-05	0.130769	1
Dnajb5	0.177527	1.4514e-05	0.119231	1
Phactr3	0.177445	1.4691e-05	0.146154	1
Stxbp6	0.176425	1.59696e-05	0.146154	1
Tubb2a	0.176185	1.72605e-05	0.134615	1
Atp2b1	0.174118	2.30343e-05	0.146154	1
Camkv	0.173623	2.4104e-05	0.138462	1
Dlx6as1	0.173599	2.45288e-05	0.142308	1
Grm5	0.172409	2.66505e-05	0.123077	1
Celf1	0.171792	3.04704e-05	0.134615	1
Ap2m1	0.168324	4.56001e-05	0.123077	1
Ywhaq	0.167587	5.00858e-05	0.115385	1
Ppp3ca	0.166402	5.3452e-05	0.0769231	1
Gm12070	0.166966	5.3532e-05	0.126923	1
Wipf3	0.166937	5.37634e-05	0.153846	1
Pgbd5	0.166301	5.63884e-05	0.142308	1
Cspg5	0.165285	6.63323e-05	0.119231	1
Celf3	0.164362	6.92127e-05	0.134615	1
Atp6v1b2	0.164344	7.35648e-05	0.130769	1
Cacnb3	0.163703	7.81375e-05	0.111538	1
Ptpro	0.163344	7.95698e-05	0.134615	1
Dclk2	0.163193	8.03935e-05	0.111538	1
Desi1	0.16325	8.03935e-05	0.107692	1
Ctxn3	0.161806	8.60359e-05	0.0615385	1
Ypel3	0.159174	0.000133231	0.126923	1
Gria3	0.157218	0.00015868	0.130769	1
Mlf2	0.157188	0.000160379	0.111538	1
Galnt16	0.15668	0.000167328	0.103846	1
Gnb2	0.154282	0.000185839	0.0884615	1
Nr4a1	0.154498	0.000212309	0.126923	1
Dgkz	0.154593	0.000215846	0.138462	1
Chchd10	0.153065	0.000258156	0.1	1
Cxx1a	0.152902	0.00026128	0.115385	1
Mycn	0.152169	0.00027208	0.0653846	1
Fscn1	0.15207	0.000281898	0.103846	1
Shisa7	0.151502	0.000287131	0.0807692	1
2900079G21Rik	0.150733	0.000299253	0.0653846	1
Ccsap	0.150999	0.000316958	0.111538	1
Pip5k1c	0.150981	0.000318076	0.146154	1
Ubl3	0.14898	0.000394773	0.1	1
Rab40b	0.148926	0.000398119	0.0923077	1
Ppp3r1	0.148297	0.000412062	0.123077	1
Junb	0.147972	0.000421704	0.1	1
Ppp3cb	0.148161	0.00042313	0.119231	1
Map7d1	0.147674	0.00044142	0.107692	1
Tomm70a	0.145463	0.0005201	0.107692	1
Slc32a1	0.146004	0.000535691	0.123077	1
Bzrap1	0.141362	0.000835351	0.103846	1
Ociad1	0.141061	0.000889036	0.0807692	1
Sipa1l1	0.140797	0.000924103	0.126923	1
Dab1	0.140543	0.0009289	0.107692	1
Klhl2	0.140475	0.000933657	0.0961538	1
Gpr153	0.138473	0.000943638	0.0576923	1
Etl4	0.140363	0.000944563	0.119231	1
Arx	0.139381	0.00101977	0.1	1
Atcay	0.139063	0.00108183	0.123077	1
Fam5b	0.138106	0.00111274	0.0692308	1
Ttc3	0.138472	0.0011143	0.0884615	1
Arl4d	0.13635	0.00114212	0.0807692	1
Mkl2	0.138289	0.00115427	0.0961538	1
Tenm3	0.13746	0.00123035	0.123077	1
Dnlz	0.136375	0.00135635	0.111538	1
Cacng3	0.135105	0.00135635	0.0615385	1
Nab2	0.135493	0.00137345	0.0692308	1
Ptma	0.13549	0.00144991	0.103846	1
R3hdm4	0.134869	0.00158112	0.107692	1
Ankrd63	0.133505	0.00167722	0.0538462	1
Atp2b2	0.13381	0.00172627	0.103846	1
Nog	0.133662	0.00173555	0.111538	1
S100a10	0.133455	0.00181275	0.107692	1
Ube2b	0.1333	0.00183696	0.123077	1
Anks1b	0.132841	0.0019048	0.107692	1
Tmem158	0.13255	0.00195164	0.123077	1
Anp32a	0.132387	0.00200707	0.1	1
Csdc2	0.131863	0.0021108	0.107692	1
Dlgap4	0.131476	0.00212995	0.103846	1
Fbxl16	0.131093	0.00225108	0.111538	1
Eif4a1	0.130515	0.00237053	0.111538	1
Ankrd13b	0.130088	0.00240715	0.0769231	1
Camkk2	0.130349	0.00241019	0.107692	1
Cx3cl1	0.128693	0.00246987	0.126923	1
Ak5	0.129405	0.00247534	0.0692308	1
Celf5	0.129801	0.00251382	0.130769	1
Trim9	0.128756	0.00274686	0.0961538	1
Cdk17	0.12867	0.00277919	0.0730769	1
Rasgrp1	0.127669	0.00305817	0.111538	1
Smap2	0.127017	0.00322168	0.0884615	1
Kif2a	0.125872	0.00358223	0.103846	1
Dlgap3	0.124588	0.00389224	0.111538	1
Tra2a	0.124566	0.00389224	0.111538	1
Lin7a	0.124447	0.00398557	0.126923	1
Tceal5	0.124381	0.0039984	0.130769	1
Syn2	0.124506	0.00400369	0.111538	1
Btg1	0.124035	0.00405587	0.0884615	1
Stk32c	0.123786	0.00411832	0.0615385	1
Elfn1	0.123901	0.00413273	0.0769231	1
Svop	0.123074	0.00437381	0.119231	1
Epha4	0.123055	0.00438633	0.0884615	1
Cdo1	0.121087	0.00523914	0.0961538	1
Vipr2	0.12091	0.00532478	0.103846	1
Cdr1	0.117997	0.00533596	0.0538462	1
Kctd13	0.119055	0.00577994	0.0730769	1
Hivep2	0.119777	0.00588111	0.119231	1
Gria2	0.119333	0.00610637	0.115385	1
Synpo	0.118667	0.00640085	0.0846154	1
Kank3	0.118593	0.00653077	0.0846154	1
Cbx6	0.118433	0.00657319	0.107692	1
Tmeff2	0.117814	0.00690426	0.0961538	1
Morf4l2	0.116964	0.00739125	0.119231	1
Tubb5	0.116134	0.0079127	0.0884615	1
Prkcb	0.1157	0.00815222	0.115385	1
Rap1gds1	0.115439	0.00819859	0.130769	1
Bin1	0.115314	0.00842802	0.0884615	1
Rab2a	0.115181	0.00855147	0.0884615	1
Dlx1as	0.114387	0.0087455	0.0615385	1
Psmd2	0.113949	0.00915669	0.0884615	1
Kctd4	0.11285	0.00922179	0.0653846	1
Kcnip1	0.113968	0.00925645	0.0923077	1
Sox1	0.113054	0.0097041	0.0807692	1
Elmo1	0.112862	0.0100689	0.1	1
Tuba1c	0.112591	0.0102663	0.0961538	1
Hnrnpc	0.112718	0.0102663	0.0884615	1
Rpl10a	0.112159	0.0104316	0.0769231	1
Hspa2	0.111848	0.0108627	0.111538	1
Adcy2	0.110988	0.0113163	0.115385	1
Plekha2	0.111378	0.0113233	0.119231	1
Nudt3	0.110597	0.0119951	0.0923077	1
BC018242	0.110335	0.0122397	0.115385	1
Pkig	0.109762	0.0126965	0.1	1
Pcbp3	0.109558	0.0128862	0.0884615	1
Dock3	0.109188	0.0133835	0.115385	1
A830018L16Rik	0.109003	0.0134598	0.0769231	1
Dpysl5	0.108412	0.0134738	0.0846154	1
Kcnb2	0.108159	0.0134967	0.0538462	1
Cdk5r1	0.10839	0.0140595	0.107692	1
Khdrbs1	0.108379	0.0140595	0.107692	1
Igsf3	0.107987	0.0140595	0.103846	1
Hnrnph1	0.107747	0.0147306	0.1	1
Stard10	0.107564	0.0150206	0.130769	1
Clta	0.107382	0.0152084	0.107692	1
Iqsec2	0.106809	0.0156776	0.0961538	1
Neurl1b	0.106565	0.0159946	0.0884615	1
Rasgef1a	0.10606	0.016389	0.103846	1
Gfod1	0.105068	0.0173314	0.0692308	1
Snph	0.10542	0.0174685	0.0846154	1
Ptms	0.105061	0.0175716	0.0807692	1
Ier5	0.104747	0.0181992	0.0884615	1
Prkce	0.104479	0.0185133	0.111538	1
Sphkap	0.103632	0.0185133	0.0730769	1
Dlx1	0.104018	0.0193157	0.0961538	1
Tubb3	0.103746	0.0193924	0.103846	1
Rap2a	0.103337	0.0195908	0.0923077	1
Dmwd	0.103369	0.0200172	0.0846154	1
Ampd2	0.103008	0.0201223	0.0730769	1
Syne1	0.103097	0.0201826	0.0807692	1
E030024N20Rik	0.103151	0.0204593	0.103846	1
Frmd7	0.101903	0.0206147	0.0653846	1
Lpin2	0.102233	0.0206733	0.0923077	1
Ppfia2	0.102068	0.02089	0.0730769	1
Klf16	0.1023	0.0208904	0.0538462	1
Kif5a	0.102213	0.0211133	0.0807692	1
Fcho1	0.102265	0.0211133	0.0576923	1
Qrich1	0.101628	0.0218141	0.0846154	1
Sybu	0.101642	0.0224379	0.1	1
Camta1	0.101141	0.0232315	0.115385	1
Ccrn4l	0.101144	0.0232315	0.107692	1
Clip3	0.100957	0.023258	0.0769231	1
Cacna1g	0.10099	0.023329	0.0884615	1
Celf2	0.100833	0.0237089	0.0923077	1
Pebp1	0.10049	0.0240439	0.0846154	1
Zfp428	0.100431	0.0242191	0.0807692	1
Psma2	0.100269	0.0242191	0.0692308	1
Jph4	0.0997983	0.0244013	0.0653846	1
Ube3b	0.0999124	0.0247904	0.1	1
Spag9	0.0999837	0.0249036	0.0923077	1
Hgs	0.0994256	0.0255257	0.0923077	1
Crtc1	0.0994582	0.0256555	0.0923077	1
Zfand5	0.0994517	0.0258043	0.103846	1
Dnajb6	0.0987037	0.0261396	0.0807692	1
Inha	0.0975451	0.0276405	0.0615385	1
Stip1	0.0981491	0.0280144	0.0923077	1
Mcrs1	0.0978399	0.0283972	0.0807692	1
Sh3glb2	0.0978086	0.0288308	0.0769231	1
Mark2	0.096461	0.0289106	0.0538462	1
Tiam1	0.0972493	0.0297706	0.0884615	1
Ahsa1	0.0960434	0.0317414	0.0884615	1
Lrp8	0.0958849	0.0329965	0.111538	1
Cadm3	0.09556	0.0339277	0.0884615	1
Hpca	0.0946176	0.0342815	0.0692308	1
Ank3	0.0948259	0.0348374	0.0923077	1
Rbfox1	0.0947121	0.0359062	0.0923077	1
Hnrnpk	0.0941537	0.0360073	0.103846	1
2310036O22Rik	0.0939435	0.0370546	0.0923077	1
Tuba8	0.093357	0.0373646	0.0653846	1
Ppfia3	0.0929608	0.0389558	0.0653846	1
Rasgrf2	0.0928182	0.0393094	0.0730769	1
Dcaf7	0.0930753	0.03972	0.0807692	1
Wisp1	0.0918975	0.0403264	0.0615385	1
Itgav	0.0925605	0.0404601	0.0807692	1
Vwc2	0.0919284	0.0404601	0.0730769	1
Fbxw7	0.0905174	0.0465979	0.107692	1
Csnk1g3	0.0904887	0.0466321	0.0923077	1
Pcdh10	0.0899542	0.0480552	0.0846154	1
Nme1	0.0895469	0.0493533	0.0730769	1
Glul	0.460369	0	0.315385	2
Sparcl1	0.487041	0	0.303846	2
Gja1	0.309316	0	0.211538	2
Id3	0.342058	0	0.153846	2
Kctd12	0.41727	0	0.0923077	2
Sash1	0.358679	0	0.0923077	2
Ptn	0.383842	0	0.0730769	2
Npy	0.283033	1.10072e-13	0.0884615	2
Gpm6b	0.288577	1.77421e-13	0.180769	2
Slc7a11	0.282012	3.41939e-13	0.107692	2
Epas1	0.277506	1.49793e-12	0.169231	2
Laptm4a	0.273816	2.41953e-12	0.123077	2
Cyp2j6	0.264698	3.80711e-12	0.0730769	2
B2m	0.262442	2.23458e-11	0.115385	2
Fxyd6	0.25105	1.7574e-10	0.1	2
Phgdh	0.249129	1.98497e-10	0.0923077	2
Prdx1	0.247894	2.98881e-10	0.103846	2
Foxo1	0.246587	3.24199e-10	0.0769231	2
Ptgds	0.236901	8.45727e-10	0.0576923	2
Igf1	0.236724	1.89906e-09	0.119231	2
Myo5a	0.237262	2.15402e-09	0.165385	2
Msi2	0.237105	2.25438e-09	0.165385	2
Atp1a2	0.22546	1.56362e-08	0.146154	2
Cav2	0.224528	1.56362e-08	0.0653846	2
Heyl	0.217082	1.88674e-08	0.0961538	2
Scd2	0.222598	2.38358e-08	0.123077	2
Lamp1	0.216394	6.00985e-08	0.146154	2
Atp1b2	0.21661	6.60891e-08	0.134615	2
Lmo4	0.209952	1.55249e-07	0.0961538	2
Shisa2	0.206423	1.61572e-07	0.0846154	2
Dst	0.205211	2.95194e-07	0.107692	2
2021-09-15	0.203436	3.88787e-07	0.107692	2
Slc13a3	0.202239	4.6383e-07	0.0615385	2
Matn4	0.198897	5.43163e-07	0.0576923	2
Ifi27l1	0.196926	7.54788e-07	0.0923077	2
2310022B05Rik	0.193685	1.06548e-06	0.0807692	2
Tnfrsf19	0.196366	1.06752e-06	0.0846154	2
Slc4a4	0.190024	2.67519e-06	0.130769	2
Prrg3	0.186261	2.68624e-06	0.0653846	2
Aldh7a1	0.188232	2.90716e-06	0.0615385	2
Zfp644	0.185978	4.44398e-06	0.0692308	2
Aqp1	0.183684	4.91779e-06	0.0769231	2
Lrp4	0.184798	5.43393e-06	0.0730769	2
Magt1	0.184154	5.77491e-06	0.0769231	2
S100a16	0.182418	6.77829e-06	0.0807692	2
Slc16a1	0.181658	7.27145e-06	0.0769231	2
Gatm	0.181256	7.61539e-06	0.0692308	2
Thbs2	0.179529	8.32507e-06	0.0615385	2
Cav1	0.177315	1.19005e-05	0.0807692	2
Mpp6	0.178188	1.2382e-05	0.0653846	2
Snhg11	0.172989	1.48062e-05	0.0730769	2
Cald1	0.176025	1.51634e-05	0.0730769	2
Rnd3	0.17541	1.56543e-05	0.0653846	2
Tspan3	0.175848	1.71557e-05	0.123077	2
Mdk	0.173042	2.28031e-05	0.0653846	2
Elovl5	0.173136	2.31023e-05	0.0884615	2
Rplp1	0.172141	2.76777e-05	0.1	2
Slc9a3r1	0.170741	3.22802e-05	0.0961538	2
Prss23	0.166548	4.50428e-05	0.0846154	2
Slc35f1	0.166268	4.79991e-05	0.0730769	2
Qk	0.167213	5.06918e-05	0.1	2
Hadhb	0.163475	6.00491e-05	0.0846154	2
Bmp7	0.164809	6.43856e-05	0.0846154	2
Zfp36l1	0.162679	7.54158e-05	0.0538462	2
Nsdhl	0.161713	8.17266e-05	0.0884615	2
Itm2a	0.160419	9.67494e-05	0.107692	2
Ccni	0.159538	0.000103203	0.0769231	2
Nnat	0.159659	0.000105728	0.0730769	2
Cntfr	0.158362	0.000119163	0.0653846	2
Fmnl2	0.158083	0.00013858	0.0884615	2
Pde1c	0.157034	0.000149737	0.0538462	2
Fam107a	0.155901	0.000170098	0.0807692	2
Gria4	0.149915	0.000272823	0.0615385	2
Nek9	0.14985	0.000332096	0.0961538	2
9630033F20Rik	0.149714	0.00034897	0.0730769	2
Grb14	0.146582	0.000387862	0.0692308	2
Slc1a4	0.14745	0.000401148	0.0615385	2
Synm	0.141104	0.000401148	0.0576923	2
Hsd17b11	0.145082	0.000488095	0.0615385	2
Cttnbp2nl	0.143932	0.00064571	0.0576923	2
Tns3	0.143052	0.000681469	0.0923077	2
Sft2d2	0.140096	0.000711402	0.0615385	2
Chl1	0.141553	0.000734231	0.0769231	2
Ttyh1	0.14224	0.000762695	0.0884615	2
Meg3	0.142035	0.000782832	0.0961538	2
Serinc3	0.142011	0.000807391	0.0769231	2
Tgfbr1	0.139831	0.000889036	0.0576923	2
Bcar3	0.138701	0.000937541	0.0692308	2
Acadl	0.138249	0.00107413	0.0769231	2
Epb4.1l2	0.136602	0.00115427	0.0576923	2
Cnot4	0.135743	0.00137345	0.0692308	2
Islr	0.135337	0.00139473	0.0615385	2
Dmxl1	0.135274	0.00151697	0.0884615	2
Sema6a	0.133311	0.00157952	0.0538462	2
2021-09-02	0.134602	0.00159809	0.103846	2
Cd81	0.134478	0.00164785	0.107692	2
Nedd4	0.131115	0.00220975	0.0769231	2
Cyp4v3	0.129079	0.00228981	0.0692308	2
Bsg	0.130157	0.00232983	0.123077	2
Ptprj	0.129197	0.00236625	0.0653846	2
Rps9	0.128856	0.00255476	0.0615385	2
Ddrgk1	0.128594	0.00258508	0.0538462	2
Mll5	0.127235	0.0025946	0.0538462	2
Lcat	0.128533	0.00267211	0.0692308	2
Eci2	0.126738	0.00284077	0.0615385	2
Zfp703	0.125879	0.00309051	0.0730769	2
Spon1	0.126682	0.00325927	0.107692	2
Fam3c	0.123674	0.00389224	0.0923077	2
Mfsd2a	0.122483	0.00389224	0.0576923	2
Prex1	0.124022	0.00400172	0.0769231	2
Crebrf	0.122793	0.00409719	0.0576923	2
Serping1	0.121275	0.00433789	0.0653846	2
Tmem123	0.12229	0.00440928	0.0653846	2
Cmtm4	0.121972	0.00463397	0.0538462	2
Sh3pxd2b	0.119832	0.0048996	0.0538462	2
Plce1	0.115538	0.0054858	0.0576923	2
Iqgap1	0.119065	0.00577994	0.0615385	2
Arhgap32	0.11798	0.00578976	0.0615385	2
Fmn2	0.117491	0.00653119	0.0730769	2
Ptprz1	0.117432	0.00695244	0.0730769	2
2021-09-09	0.11304	0.00746464	0.0653846	2
Tpr	0.114832	0.00813589	0.0653846	2
Gkap1	0.114624	0.00878925	0.0692308	2
Lrp1	0.114391	0.00884143	0.0961538	2
Cgnl1	0.113868	0.00885267	0.0730769	2
Ncl	0.114244	0.00895161	0.0576923	2
Arid4a	0.113479	0.00917022	0.0730769	2
Tspan14	0.11346	0.00925645	0.0615385	2
Col4a1	0.111547	0.00998816	0.0615385	2
Mapkapk2	0.112415	0.0100308	0.0615385	2
Tmed5	0.111223	0.0111669	0.0769231	2
Notch1	0.110781	0.0113163	0.0576923	2
Metrn	0.111127	0.0113421	0.0961538	2
Nid1	0.108249	0.0114692	0.0538462	2
Map4k4	0.110401	0.0114973	0.0807692	2
Rnf130	0.110433	0.0115674	0.0653846	2
Ube3a	0.109053	0.0118943	0.0538462	2
Cd164	0.108128	0.013901	0.0653846	2
Arhgef12	0.107225	0.0142207	0.0769231	2
Ugdh	0.10663	0.0155171	0.0692308	2
Gjb6	0.106298	0.0158592	0.0769231	2
Arpc5	0.106006	0.0163054	0.0653846	2
Abhd4	0.104685	0.016389	0.0730769	2
Gstm1	0.105674	0.0165346	0.0653846	2
Ppp1r2	0.10514	0.0175167	0.0961538	2
Ciz1	0.104976	0.0175521	0.0538462	2
Rsu1	0.103423	0.0185133	0.0576923	2
Ly6a	0.103756	0.018798	0.0653846	2
Sat1	0.103346	0.0190501	0.0576923	2
Usp54	0.103456	0.0193924	0.0730769	2
Plat	0.101922	0.020479	0.0538462	2
Gnai2	0.102453	0.020877	0.0576923	2
Cox6b1	0.100492	0.0239015	0.0807692	2
Tmco1	0.100187	0.0239522	0.0807692	2
Ndufv3	0.0998758	0.0239867	0.0846154	2
Eea1	0.0995235	0.0249873	0.0576923	2
Mpp5	0.0990949	0.0255393	0.0692308	2
B4galt6	0.0975916	0.0261217	0.0538462	2
Zfand2a	0.098538	0.0266247	0.0538462	2
Pcm1	0.0979772	0.0276391	0.0846154	2
Thbd	0.0961258	0.0300092	0.0576923	2
Hadh	0.0938447	0.0369029	0.0653846	2
Dynll2	0.0938637	0.0369097	0.0576923	2
Pnrc2	0.0922808	0.0392186	0.0730769	2
Mxi1	0.0908458	0.0402034	0.0653846	2
Tmed10	0.0923682	0.041105	0.0615385	2
Mapk8ip1	0.091409	0.0422323	0.0692308	2
Apoe	0.669616	0	0.326923	3
Sepp1	0.480357	0	0.296154	3
Apod	0.521185	0	0.161538	3
Timp3	0.440908	0	0.161538	3
Marcks	0.419981	0	0.157692	3
Fabp7	0.662736	0	0.153846	3
Ahcyl2	0.392881	0	0.15	3
Prdx6	0.337464	0	0.15	3
Lpar1	0.511713	0	0.138462	3
Nr2f2	0.490904	0	0.138462	3
S100a5	0.471076	0	0.138462	3
Gng13	0.499133	0	0.126923	3
Scd1	0.576099	0	0.126923	3
Sorbs1	0.43976	0	0.119231	3
Frzb	0.359795	0	0.115385	3
Igfbp7	0.389722	0	0.111538	3
Mcf2l	0.700341	0	0.111538	3
Tmem132b	0.349587	0	0.111538	3
Vim	0.38842	0	0.111538	3
Igfbp5	0.53538	0	0.107692	3
Bgn	0.330163	0	0.103846	3
Lrrc58	0.309262	0	0.103846	3
Plp1	0.36611	0	0.1	3
Foxd3	0.347107	0	0.0961538	3
Plekhb1	0.372553	0	0.0961538	3
Pmepa1	0.313032	0	0.0961538	3
Ppfia1	0.422776	0	0.0961538	3
Cldn5	0.368519	0	0.0884615	3
Hey2	0.315889	0	0.0884615	3
Mest	0.363062	0	0.0884615	3
Vtn	0.326767	0	0.0884615	3
Ahnak	0.341687	0	0.0846154	3
Kif5b	0.54812	0	0.0846154	3
Nudt4	0.434106	0	0.0846154	3
Sh3pxd2a	0.378961	0	0.0846154	3
Agt	0.392988	0	0.0807692	3
Ccnd1	0.486853	0	0.0769231	3
Igfbp4	0.422337	0	0.0769231	3
Lamc1	0.299605	0	0.0769231	3
Omp	0.422093	0	0.0769231	3
Afap1l2	0.310414	0	0.0730769	3
Mfap3l	0.373474	0	0.0730769	3
Zdhhc2	0.320547	0	0.0730769	3
Atf5	0.402868	0	0.0692308	3
Ccnd2	0.385382	0	0.0692308	3
Unc13c	0.583032	0	0.0692308	3
Arhgap5	0.331186	0	0.0653846	3
Hes5	0.323536	0	0.0653846	3
Trak2	0.579959	0	0.0615385	3
Apc	0.587509	0	0.0576923	3
Fmo1	0.296628	8.60715e-15	0.103846	3
Gpt2	0.300143	8.60715e-15	0.0846154	3
Pla2g16	0.298517	8.60715e-15	0.0807692	3
Clca1	0.286974	1.7035e-14	0.0615385	3
Edil3	0.293834	2.5289e-14	0.0846154	3
Aspa	0.293126	3.33747e-14	0.0692308	3
Gsn	0.292939	4.0884e-14	0.0884615	3
Psat1	0.292577	4.80988e-14	0.1	3
Vstm4	0.290323	4.80988e-14	0.0961538	3
Sparc	0.291555	7.93863e-14	0.138462	3
Hmgcs2	0.276738	5.47553e-13	0.107692	3
Sox10	0.276346	1.19127e-12	0.0846154	3
S100a6	0.268672	1.83296e-12	0.0730769	3
Dbi	0.268396	7.00138e-12	0.126923	3
S100b	0.261953	1.90688e-11	0.1	3
Dab2ip	0.259358	2.34401e-11	0.0538462	3
Rgcc	0.258789	3.02181e-11	0.1	3
Tmod2	0.255055	9.31246e-11	0.0846154	3
Arpc1b	0.24443	1.36479e-10	0.0692308	3
Pik3r1	0.24078	6.50528e-10	0.0769231	3
Scrib	0.223029	2.19359e-09	0.0653846	3
Tax1bp3	0.233727	2.3027e-09	0.0846154	3
Col11a1	0.228449	3.5708e-09	0.0769231	3
Ctnna1	0.225355	1.15634e-08	0.0807692	3
Mmd2	0.225448	1.45884e-08	0.115385	3
Cnn3	0.224641	1.58665e-08	0.0961538	3
Wls	0.2172	1.6399e-08	0.0653846	3
Itm2b	0.222287	2.38358e-08	0.107692	3
Ncam1	0.220971	2.53854e-08	0.111538	3
Cebpd	0.212918	7.22546e-08	0.107692	3
Vat1l	0.205418	2.14075e-07	0.103846	3
Tspan15	0.206313	2.29568e-07	0.0653846	3
Ifitm3	0.205313	2.73006e-07	0.0730769	3
Fyco1	0.195862	4.43328e-07	0.0730769	3
Caskin2	0.195137	8.35703e-07	0.0807692	3
Nfia	0.198497	8.84719e-07	0.1	3
Dab2	0.186635	9.47759e-07	0.0538462	3
Zfp36l2	0.190608	1.40652e-06	0.0576923	3
Rcn1	0.192431	1.75942e-06	0.0615385	3
Snx18	0.188113	3.56475e-06	0.0807692	3
Arvcf	0.180655	4.33315e-06	0.0653846	3
Eid1	0.182379	6.03995e-06	0.0923077	3
Arhgap29	0.180987	7.66123e-06	0.0653846	3
Pmp22	0.182027	7.70168e-06	0.0730769	3
Anxa5	0.176956	1.2382e-05	0.0692308	3
Akap12	0.176601	1.28139e-05	0.0538462	3
Tbc1d9b	0.176049	1.38936e-05	0.0807692	3
Tmsb4x	0.17577	1.42075e-05	0.0692308	3
Col9a2	0.17045	1.59696e-05	0.0538462	3
Mboat2	0.175094	1.67732e-05	0.0538462	3
Cd9	0.171124	2.88769e-05	0.0653846	3
Lifr	0.169669	3.28634e-05	0.0730769	3
Col12a1	0.151604	5.73571e-05	0.0576923	3
Srebf1	0.163483	7.21099e-05	0.0846154	3
Serpinh1	0.160036	8.73547e-05	0.0846154	3
Fads1	0.157964	0.00013858	0.0884615	3
Syne2	0.156636	0.000154247	0.0807692	3
Prkd3	0.155702	0.000154247	0.0769231	3
Dtx4	0.15147	0.000187223	0.0730769	3
Rpl41	0.155049	0.000188724	0.0884615	3
Acsbg1	0.151755	0.000274866	0.0846154	3
Tram1	0.14888	0.000355064	0.0576923	3
Rlbp1	0.144986	0.000401148	0.0730769	3
Ly6c1	0.147317	0.000402767	0.0653846	3
Tead1	0.14438	0.0005201	0.0538462	3
Atp8a1	0.137848	0.00104361	0.0653846	3
Fam181b	0.137991	0.00113061	0.111538	3
Hsdl2	0.133446	0.00141232	0.0538462	3
Jam3	0.134114	0.00166116	0.0769231	3
Lamp2	0.128273	0.00284022	0.0884615	3
Amer2	0.126727	0.00290297	0.0576923	3
Fam149a	0.125198	0.00332571	0.0538462	3
Tpt1	0.123191	0.00398557	0.0807692	3
Mgat3	0.120652	0.00474868	0.0692308	3
Gas7	0.120091	0.00516889	0.0576923	3
Aldh2	0.119852	0.00558712	0.0923077	3
Lrp6	0.116495	0.00640873	0.0538462	3
Trp53inp2	0.116404	0.00699907	0.0576923	3
Kcna1	0.114119	0.00868433	0.0615385	3
Dnajc1	0.106528	0.0127614	0.0653846	3
Rhoc	0.108568	0.0133654	0.0538462	3
Cpne2	0.105462	0.016389	0.0576923	3
2900060B14Rik	0.104467	0.0173558	0.0538462	3
Cpt1a	0.102786	0.0197963	0.0576923	3
Adipor1	0.102304	0.0206147	0.0615385	3
Dmd	0.100299	0.0227211	0.0615385	3
Rad21	0.100308	0.0241696	0.0615385	3
Efna5	0.097484	0.0275739	0.0615385	3
Fam213a	0.0980294	0.0277042	0.0769231	3
Cyp2j9	0.0967255	0.0290205	0.0538462	3
Fasn	0.0953867	0.0335754	0.0807692	3
Ehd1	0.0918443	0.0412316	0.0653846	3
Cplx1	0.233097	4.74791e-09	0.161538	4
Ncs1	0.22769	1.20123e-08	0.180769	4
Snap91	0.211444	1.45058e-07	0.173077	4
Atp5a1	0.201011	6.57599e-07	0.103846	4
Atp6v1e1	0.197972	1.05905e-06	0.138462	4
Gapdh	0.193768	1.83066e-06	0.134615	4
Hsp90aa1	0.192488	2.16054e-06	0.130769	4
Rasl11b	0.179887	1.10665e-05	0.134615	4
Dnm1	0.178207	1.40395e-05	0.134615	4
Stmn3	0.172102	2.80162e-05	0.138462	4
Stx16	0.168549	3.79691e-05	0.0846154	4
6330403K07Rik	0.166927	5.19076e-05	0.107692	4
Pfkp	0.163486	7.89395e-05	0.123077	4
Sfrp1	0.160814	8.37493e-05	0.0615385	4
Map1a	0.157561	0.000126499	0.111538	4
Baalc	0.157101	0.000156857	0.111538	4
Tspan7	0.157089	0.000156998	0.115385	4
Atp5b	0.156665	0.000169234	0.0923077	4
Ckb	0.143929	0.000661773	0.0884615	4
Pdhb	0.140759	0.000913791	0.115385	4
Rasl10b	0.139841	0.00091506	0.0961538	4
Cops2	0.136126	0.00129791	0.0923077	4
Scg2	0.136881	0.00132855	0.115385	4
Ankmy2	0.13569	0.00135635	0.0615385	4
Emc4	0.135584	0.00146656	0.107692	4
Rab3a	0.135795	0.00146656	0.107692	4
Cnih2	0.134544	0.00165906	0.134615	4
Lphn1	0.133418	0.00178046	0.1	4
Ppp1cc	0.132023	0.00208824	0.1	4
Ldhb	0.131344	0.00217571	0.0961538	4
Prep	0.129813	0.00232395	0.0615385	4
Syt1	0.129765	0.00254189	0.103846	4
Cdk14	0.128131	0.00292496	0.103846	4
Abr	0.127369	0.00309569	0.111538	4
Ppp1r16b	0.126952	0.00315586	0.107692	4
Gm5148	0.125847	0.00335672	0.0807692	4
Taldo1	0.125023	0.00345676	0.0846154	4
Chd3	0.124848	0.00389224	0.0923077	4
Rhobtb2	0.124371	0.00389224	0.0769231	4
Ywhag	0.122312	0.00474868	0.103846	4
Oxct1	0.12171	0.00486981	0.0807692	4
Fam220a	0.121294	0.00487166	0.0576923	4
Pgrmc1	0.121468	0.00508617	0.0807692	4
Rab3c	0.120843	0.00534856	0.103846	4
Nrip3	0.120885	0.00537184	0.0923077	4
D19Bwg1357e	0.117655	0.00676576	0.0692308	4
Podxl2	0.117309	0.00714473	0.103846	4
Dlg2	0.116842	0.00744573	0.0769231	4
Bcor	0.116074	0.00756588	0.0576923	4
Preb	0.115862	0.00808126	0.0961538	4
Tcea1	0.115055	0.00832565	0.0807692	4
Atp2a2	0.115367	0.00841478	0.0923077	4
Flcn	0.114922	0.00855147	0.0923077	4
Mt3	0.114385	0.00855147	0.0884615	4
Cadm2	0.114828	0.0087714	0.1	4
Eef1a2	0.112974	0.0100689	0.0884615	4
Gng3	0.112648	0.0102889	0.0846154	4
Champ1	0.111474	0.0103874	0.0538462	4
Pfkm	0.111466	0.0106833	0.0769231	4
Cox4i1	0.111941	0.0108234	0.0961538	4
Tsc22d3	0.109782	0.011574	0.0615385	4
Fuom	0.109642	0.0121937	0.0576923	4
Rps6	0.110188	0.0122562	0.0884615	4
BC052040	0.109221	0.0124465	0.0730769	4
Alcam	0.107318	0.0129086	0.0538462	4
Syp	0.108599	0.0137023	0.0730769	4
Bex1	0.107909	0.0144843	0.103846	4
Mea1	0.107565	0.0147306	0.0807692	4
Tbc1d30	0.107477	0.0147306	0.0576923	4
B3gat3	0.107527	0.0148928	0.0807692	4
Ube2v1	0.106829	0.0155786	0.0769231	4
Snca	0.106416	0.0161006	0.107692	4
Fam168b	0.105084	0.0173343	0.107692	4
Vstm2a	0.1052	0.017583	0.1	4
Tuba1a	0.104774	0.018128	0.0961538	4
Atp6v0a1	0.104522	0.0184725	0.0846154	4
Luc7l3	0.102706	0.020641	0.0923077	4
Aco2	0.10283	0.0206838	0.115385	4
Tmem184b	0.102138	0.021362	0.0769231	4
Top2b	0.101833	0.0216255	0.0961538	4
Trak1	0.10184	0.0216255	0.0730769	4
Uqcrh	0.101275	0.0224379	0.0615385	4
Rtn1	0.10069	0.0239015	0.0923077	4
Zdhhc6	0.099331	0.024143	0.0538462	4
Asb8	0.100069	0.0244758	0.0615385	4
Trip4	0.0991237	0.0257609	0.0807692	4
Pafah1b1	0.0993149	0.0259427	0.0923077	4
Ddah1	0.0984266	0.0261217	0.0653846	4
Fam163a	0.0980291	0.0269367	0.0730769	4
Fam43b	0.0975997	0.028638	0.0538462	4
Rtn3	0.0975277	0.029187	0.103846	4
Clk1	0.0954404	0.0321315	0.0615385	4
Kcnh2	0.0952839	0.0344734	0.0846154	4
Med14	0.0952067	0.0344915	0.0538462	4
Rnf208	0.093576	0.0346211	0.0576923	4
Pigyl	0.0934093	0.0360673	0.0538462	4
Tgfb3	0.093217	0.0371419	0.0576923	4
Dtna	0.0929223	0.0397419	0.0769231	4
Srgap2	0.0926616	0.0397937	0.0692308	4
Fabp3	0.0922038	0.0407527	0.0961538	4
Matr3	0.091865	0.0424096	0.0807692	4
Rpl11	0.0915496	0.0424096	0.0615385	4
9330159F19Rik	0.0915462	0.0424693	0.0692308	4
Scube1	0.0914939	0.0428638	0.0769231	4
Irf2bpl	0.0912563	0.0429523	0.0692308	4
Btbd2	0.0903988	0.0448008	0.0576923	4
Ssbp2	0.0907623	0.0453901	0.0923077	4
Nptx2	0.0898086	0.0471833	0.0769231	4
Rpp21	0.0898389	0.0474365	0.0576923	4
Cpe	0.373111	0	0.184615	5
Nrsn1	0.281257	6.80193e-13	0.184615	5
Doc2g	0.27929	1.12342e-12	0.180769	5
Aqp4	0.2619	3.03078e-11	0.157692	5
Cck	0.245402	3.89573e-10	0.142308	5
Ctsb	0.246044	4.23413e-10	0.130769	5
Gabra1	0.242177	9.43954e-10	0.153846	5
Cdhr1	0.235177	3.35857e-09	0.138462	5
Gfap	0.224347	9.27e-09	0.0615385	5
Rcn2	0.226431	1.42824e-08	0.161538	5
Igfbp2	0.220526	2.67284e-08	0.0846154	5
Sncb	0.216954	6.60891e-08	0.142308	5
Map1b	0.21382	9.47414e-08	0.123077	5
Slc17a7	0.213129	1.07698e-07	0.1	5
Slc38a3	0.212604	1.21929e-07	0.161538	5
Jam2	0.210881	1.60039e-07	0.134615	5
Mt2	0.209639	1.89239e-07	0.138462	5
Kcnj10	0.206809	2.57393e-07	0.15	5
Dner	0.197514	1.0726e-06	0.107692	5
Slc1a2	0.196096	1.12757e-06	0.107692	5
Trnp1	0.196211	1.31447e-06	0.15	5
Serpine2	0.19201	2.21531e-06	0.134615	5
Eomes	0.191278	2.39631e-06	0.0961538	5
2900097C17Rik	0.189098	2.90716e-06	0.0884615	5
Slc6a11	0.188698	3.49534e-06	0.111538	5
Shisa9	0.185767	4.61237e-06	0.0961538	5
Olfm1	0.185773	5.25802e-06	0.142308	5
Iqsec3	0.18301	7.05944e-06	0.1	5
Nufip2	0.178539	8.53038e-06	0.0692308	5
Hlf	0.179388	1.18143e-05	0.1	5
Dio2	0.176776	1.40294e-05	0.0923077	5
Dnajc6	0.173535	2.36091e-05	0.0923077	5
Pnpla8	0.169609	3.69312e-05	0.0923077	5
Asrgl1	0.167057	4.70254e-05	0.0884615	5
Calb2	0.166656	5.06918e-05	0.111538	5
Bcan	0.160203	0.000101235	0.0884615	5
Rcan2	0.160525	0.000101586	0.119231	5
Rab3b	0.158315	0.000134171	0.107692	5
Sema7a	0.157213	0.000154247	0.0923077	5
Lhfpl3	0.154219	0.000219506	0.1	5
Vsnl1	0.15195	0.000257845	0.0807692	5
Syt7	0.15277	0.000262086	0.126923	5
Lyn	0.151971	0.000264621	0.0769231	5
Ifit2	0.149401	0.000332096	0.0769231	5
Aldoc	0.147201	0.000440324	0.103846	5
Chgb	0.147378	0.000463011	0.115385	5
Trh	0.14458	0.000538288	0.0730769	5
AI593442	0.141101	0.000772649	0.0615385	5
Mt1	0.140102	0.000943841	0.115385	5
Nmb	0.132976	0.00186162	0.123077	5
Zfp385a	0.131999	0.00197849	0.0884615	5
Grin3a	0.130163	0.00227858	0.0615385	5
Cntnap1	0.130655	0.00232113	0.0846154	5
Gap43	0.129173	0.00251006	0.0538462	5
Kcna2	0.129058	0.0025946	0.107692	5
Glud1	0.127402	0.00302271	0.0923077	5
Arrb1	0.124702	0.00383035	0.0807692	5
Thsd7a	0.123048	0.00440074	0.0846154	5
Rab37	0.121656	0.00474868	0.0615385	5
Ms4a15	0.122164	0.00478388	0.0807692	5
Axl	0.121299	0.00501792	0.0846154	5
Gabrb2	0.119015	0.0057475	0.0615385	5
D10Jhu81e	0.119248	0.00603054	0.107692	5
Nefl	0.117906	0.00640873	0.0615385	5
Nap1l5	0.117384	0.0068797	0.0961538	5
Usp34	0.115553	0.00690426	0.0615385	5
Rgs2	0.116014	0.00693969	0.0615385	5
Ncan	0.116996	0.00720219	0.1	5
Diras2	0.116424	0.00756504	0.0961538	5
Fgfr1	0.114744	0.00872969	0.0769231	5
Strbp	0.114466	0.00885882	0.0807692	5
Arl6ip1	0.113217	0.00965366	0.0769231	5
Reln	0.112699	0.00990484	0.0615385	5
Shisa3	0.112623	0.0100845	0.0846154	5
Spp1	0.109246	0.0128862	0.0730769	5
Ptpn4	0.107881	0.0132593	0.0615385	5
Ppap2b	0.107991	0.0135028	0.0846154	5
Dzank1	0.108035	0.0140595	0.0884615	5
Gls	0.107939	0.0141319	0.0807692	5
Gpr37l1	0.107174	0.0150515	0.0769231	5
Slc1a3	0.107045	0.0154761	0.0923077	5
Pla2g7	0.105997	0.0157718	0.0692308	5
Car2	0.105854	0.016389	0.0692308	5
Vegfa	0.105259	0.0171634	0.0730769	5
Nrxn1	0.104431	0.0185133	0.0769231	5
Agpat3	0.102607	0.0197029	0.0769231	5
Fndc5	0.10241	0.020641	0.0769231	5
Tmem50b	0.0992677	0.025329	0.0730769	5
Hspa12a	0.0988749	0.0257261	0.0653846	5
Adk	0.0993198	0.0259427	0.0846154	5
Slc6a1	0.09782	0.0283583	0.0807692	5
Tuba4a	0.0958375	0.0329688	0.0884615	5
Nrn1	0.0950913	0.0335665	0.0538462	5
Pak1	0.0951432	0.0341724	0.0884615	5
Zfp804a	0.0945018	0.0345985	0.0730769	5
Fgfr3	0.0944415	0.0360673	0.0769231	5
Kifc3	0.0936494	0.0364653	0.0538462	5
Kif1b	0.0941334	0.0367441	0.0692308	5
Enho	0.0940274	0.0372358	0.0884615	5
Rasd2	0.0934396	0.0381327	0.0769231	5
Pitpnc1	0.0929213	0.0389558	0.0615385	5
Inadl	0.0925023	0.0397307	0.0653846	5
Grm1	0.0923181	0.0410906	0.1	5
Uchl1	0.0911783	0.0439306	0.0769231	5
Zbtb4	0.0910121	0.0439306	0.0576923	5
Gabrg2	0.0907347	0.0456235	0.0692308	5
Lypla1	0.0897855	0.0474922	0.0692308	5
