# Supplementary material for: Characterizing spatial gene expression heterogeneity in spatially resolved single-cell transcriptomic data with nonuniform cellular densities
Source: Genome Res. 2021 Oct;31(10):1843–55. doi: 10.1101/gr.271288.120 (PMC8494224; doi:10.1101/gr.271288.120)
Supplement: Supplemental Material [file supp_gr.271288.120_Supplemental_Table_S2.xlsx]

## Sheet: 2supp_table_2
# Supplemental Table S2. MERINGUE results for SlideSeq data of the Purkinje layer of the cerebellum
	I	Adjusted P-value	Percent Driving
Aldoc	0.458357	0	0.124575
Ttr	0.246243	0	0.0419026
mt-Rnr2	0.140828	8.36897e-09	0.0622877
Car8	0.11938	1.99567e-06	0.0985277
Pcp4	0.0975074	0.000210473	0.0713477
Gng13	0.0854141	0.00184304	0.0498301
Atp2b2	0.0734144	0.011902	0.0486976
Nefh	0.0582386	0.0894471	NA
Cfl1	0.051701	0.157185	NA
Malat1	0.0527556	0.157185	NA
Tecr	0.0519376	0.157185	NA
Rgs8	0.0479304	0.228743	NA
Hnrnpa2b1	0.0452852	0.269125	NA
Lars2	0.0445575	0.269125	NA
Cox4i1	0.0418852	0.300792	NA
Hsp90b1	0.0410565	0.300792	NA
Meg3	0.0399744	0.300792	NA
Mt2	0.0425886	0.300792	NA
Ndufa3	0.0402194	0.300792	NA
Pebp1	0.0407958	0.300792	NA
Slc1a6	0.0416757	0.300792	NA
Auts2	0.0388868	0.304868	NA
Hspa8	0.0384643	0.304868	NA
Kcnc3	0.0385042	0.304868	NA
Atpif1	0.0365216	0.349759	NA
Ckb	0.0357563	0.36844	NA
Nsg1	0.0338869	0.395132	NA
Rora	0.0337199	0.395132	NA
Slc25a4	0.0342872	0.395132	NA
Uqcrq	0.0319711	0.440954	NA
Cox8a	0.0297434	0.51919	NA
Atp5g3	0.0289426	0.536873	NA
Atp1a2	0.0282857	0.543845	NA
Pafah1b1	0.0273403	0.571075	NA
Plcb4	0.0268427	0.575522	NA
Atp2a2	0.025217	0.618599	NA
Idh3b	0.0250915	0.618599	NA
Rn18s-rs5	0.0247529	0.623457	NA
2010107E04Rik	0.0234939	0.630369	NA
Atp5a1	0.0231768	0.630369	NA
Calm2	0.0228812	0.630369	NA
Lpgat1	0.0230719	0.630369	NA
Pvalb	0.0220619	0.630369	NA
Rab3a	0.0218663	0.630369	NA
Uqcrh	0.022055	0.630369	NA
Vimp	0.023603	0.630369	NA
Atp6v1a	0.0202812	0.645383	NA
Pnisr	0.0209646	0.645383	NA
Ttc3	0.0202511	0.645383	NA
mt-Co1	0.0207755	0.645383	NA
Pcp2	0.0197587	0.647216	NA
mt-Nd5	0.019724	0.647216	NA
Ndufa4	0.0184613	0.685876	NA
Rgs7bp	0.0179164	0.685876	NA
2021-09-07	0.0179267	0.685876	NA
mt-Nd4	0.0169624	0.715491	NA
Cox6a1	0.0162533	0.719748	NA
Ywhah	0.01635	0.719748	NA
Ndufc2	0.0156509	0.731706	NA
Arhgap5	0.0124146	0.73995	NA
Atp5h	0.0127904	0.73995	NA
Cox6b1	0.0118707	0.73995	NA
Dbi	0.0146181	0.73995	NA
Dner	0.0117446	0.73995	NA
Eif5	0.0117534	0.73995	NA
Fam107a	0.0128009	0.73995	NA
Gnas	0.0146434	0.73995	NA
Itpr1	0.0131536	0.73995	NA
Kcna1	0.013226	0.73995	NA
Mpc2	0.0129622	0.73995	NA
Ndufb8	0.0124134	0.73995	NA
S100b	0.0133934	0.73995	NA
Ywhae	0.0130144	0.73995	NA
Cystm1	0.0110146	0.754098	NA
Sparc	0.0105613	0.755823	NA
Stmn3	0.0105418	0.755823	NA
Aldoa	0.00882615	0.759329	NA
Atp5j2	0.00819325	0.759329	NA
Cox5b	0.0097964	0.759329	NA
Creg1	0.00997211	0.759329	NA
Ldhb	0.00941989	0.759329	NA
Mdh1	0.00838705	0.759329	NA
Ndrg4	0.00867564	0.759329	NA
Ptprr	0.00874531	0.759329	NA
Rtn4	0.00916652	0.759329	NA
Atp1b1	0.0075345	0.767962	NA
mt-Nd1	0.00768947	0.767962	NA
Atp5j	0.00562958	0.799529	NA
Cox5a	0.00632052	0.799529	NA
Gsk3b	0.00503677	0.799529	NA
Homer3	0.00549031	0.799529	NA
Kitl	0.00539419	0.799529	NA
Pkm	0.00501014	0.799529	NA
Snhg11	0.00492372	0.799529	NA
Arl3	0.00337834	0.809039	NA
Atp5b	0.00318088	0.809039	NA
Hint1	0.00427834	0.809039	NA
Prdx2	0.00318262	0.809039	NA
Rtn1	0.00322499	0.809039	NA
Serinc1	0.00346599	0.809039	NA
Gabra1	0.00291375	0.809804	NA
Chchd10	0.00236891	0.819802	NA
mt-Nd2	0.00209347	0.821124	NA
Ubb	0.00179841	0.8226	NA
App	-0.0019883	0.83119	NA
Atp5d	-0.00167678	0.83119	NA
Atp5o	-0.00263379	0.83119	NA
Cd81	-0.00302414	0.83119	NA
Cdc42	0.00126334	0.83119	NA
Chchd2	-0.00205986	0.83119	NA
Cox7a2	-0.000469059	0.83119	NA
Fth1	-0.00244458	0.83119	NA
Hsp90aa1	-0.00221456	0.83119	NA
Itm2b	-0.000836247	0.83119	NA
Minos1	-0.00233961	0.83119	NA
Ndrg2	-0.00200625	0.83119	NA
Prdx5	-0.000509081	0.83119	NA
Pura	-0.00178622	0.83119	NA
Sepw1	0.000757493	0.83119	NA
Sparcl1	-0.000474567	0.83119	NA
Stmn2	-0.00311023	0.83119	NA
Tspan7	-0.000552517	0.83119	NA
Uqcr11	-0.00258926	0.83119	NA
Apoe	-0.00380292	0.835659	NA
Atp5f1	-0.00401331	0.835659	NA
Thy1	-0.00386236	0.835659	NA
mt-Rnr1	-0.00464607	0.845675	NA
Cst3	-0.0048963	0.845907	NA
Slc1a3	-0.00518772	0.846804	NA
Actb	-0.00598335	0.847701	NA
Frrs1l	-0.00589248	0.847701	NA
Hsp90ab1	-0.00587858	0.847701	NA
Gad1	-0.00685679	0.86352	NA
Tcf25	-0.00824669	0.891303	NA
Dgkz	-0.00866946	0.894333	NA
Ywhaq	-0.00920273	0.901087	NA
Calb1	-0.010423	0.902661	NA
Calm1	-0.0103136	0.902661	NA
Gpr37l1	-0.00980644	0.902661	NA
Sec62	-0.0104774	0.902661	NA
Arl6ip1	-0.0137156	0.909134	NA
Atp5c1	-0.0142012	0.909134	NA
Cox7b	-0.0132208	0.909134	NA
Cpe	-0.0157074	0.909134	NA
Gpm6b	-0.0117995	0.909134	NA
Gria2	-0.0136185	0.909134	NA
Id2	-0.0126119	0.909134	NA
Lhx1	-0.0155443	0.909134	NA
Lhx1os	-0.0110389	0.909134	NA
Mt1	-0.0124747	0.909134	NA
Mtss1	-0.0121072	0.909134	NA
Ndufa13	-0.0157632	0.909134	NA
Ndufa6	-0.0159493	0.909134	NA
Oxct1	-0.0159231	0.909134	NA
Ppp1r17	-0.0155271	0.909134	NA
Selm	-0.0160257	0.909134	NA
Ywhaz	-0.0146048	0.909134	NA
Slc25a5	-0.0164783	0.912637	NA
Gnao1	-0.0172904	0.914222	NA
Hpcal1	-0.0175229	0.914222	NA
Tspan13	-0.0176484	0.914222	NA
Mir6236	-0.018137	0.9154	NA
Erp29	-0.0189084	0.923624	NA
Dynll2	-0.020758	0.931917	NA
Snap25	-0.0205468	0.931917	NA
Zranb2	-0.0206623	0.931917	NA
Cacnb4	-0.0212016	0.933065	NA
Grid2	-0.0230509	0.942155	NA
Scg3	-0.0230024	0.942155	NA
Sptan1	-0.0229043	0.942155	NA
Fkbp3	-0.0242328	0.944076	NA
Map1b	-0.0256544	0.944076	NA
2021-09-04	-0.0250479	0.944076	NA
Skp1a	-0.0253826	0.944076	NA
Tspan3	-0.0247709	0.944076	NA
Fam21	-0.0273298	0.94456	NA
Gabbr1	-0.0265644	0.94456	NA
Nap1l5	-0.0274308	0.94456	NA
Ank2	-0.027811	0.944645	NA
Anks1b	-0.0298137	0.951067	NA
Ndufa5	-0.0298348	0.951067	NA
Cox6c	-0.03117	0.955029	NA
Slc25a3	-0.0330321	0.963117	NA
Mbnl2	-0.0346166	0.964091	NA
Ywhab	-0.0347692	0.964091	NA
Calm3	-0.0372499	0.968481	NA
Cox14	-0.0383077	0.968481	NA
Spock2	-0.040862	0.968481	NA
Tmsb4x	-0.0403928	0.968481	NA
mt-Cytb	-0.040624	0.968481	NA
Map7d2	-0.0542919	0.99148	NA
