# Supplementary material for: Characterizing spatial gene expression heterogeneity in spatially resolved single-cell transcriptomic data with nonuniform cellular densities
Source: Genome Res. 2021 Oct;31(10):1843–55. doi: 10.1101/gr.271288.120 (PMC8494224; doi:10.1101/gr.271288.120)
Supplement: Supplemental Material [file supp_gr.271288.120_Supplemental_Table_S3.xlsx]

## Sheet: 2supp_table_3
# Supplemental Table S3. MERINGUE results for 3D aligned ISH data of the Drosophila embryo.
	I	Adjusted P-value	Percent Driving	Pattern
CG17724	0.899984	0	0.362768	1
CenG1A	0.907202	0	0.349259	1
numb	0.9335	0	0.343657	1
CG14427	0.896619	0	0.319934	1
CG11208	0.924094	0	0.311697	1
bowl	0.782842	0	0.275453	1
oc	0.966181	0	0.14201	1
CG17786	0.899218	0	0.131796	1
ems	0.910773	0	0.0899506	1
erm	0.742634	0	0.0527183	1
Ama	0.957934	0	0.534761	2
Cyp310a1	0.861858	0	0.349588	2
Traf4	0.784224	0	0.341351	2
Mes2	0.958511	0	0.312026	2
sna	0.981078	0	0.223064	2
twi	0.980159	0	0.213839	2
NetA	0.972062	0	0.201647	2
Ilp4	0.973812	0	0.171334	2
htl	0.97157	0	0.151895	2
MESR3	0.885195	0	0.421417	3
apt	0.934385	0	0.310708	3
disco	0.923275	0	0.275453	3
tll	0.973042	0	0.183855	3
CG8147	0.920559	0	0.143657	3
fkh	0.979041	0	0.106096	3
rau	0.924884	0	0.0962109	3
tkv	0.890269	0	0.409226	4
edl	0.821002	0	0.333443	4
CG10479	0.844573	0	0.308731	4
zfh1	0.75765	0	0.304778	4
Doc3	0.905479	0	0.257002	4
Doc2	0.949743	0	0.145634	4
Ance	0.886291	0	0.0771005	4
Blimp.1	0.837529	0	0.409885	5
bmm	0.916861	0	0.395058	5
gt	0.907771	0	0.295552	5
Dfd	0.933045	0	0.285667	5
cnc	0.922334	0	0.202306	5
noc	0.928584	0	0.150247	5
ImpE2	0.962522	0	0.0817133	5
dan	0.938286	0	0.524547	6
danr	0.9503	0	0.511367	6
brk	0.870917	0	0.50346	6
mfas	0.835154	0	0.369028	6
lok	0.939144	0	0.352883	6
ImpL2	0.853599	0	0.271829	6
Btk29A	0.948889	0	0.552224	7
gk	0.94483	0	0.420758	7
D	0.904873	0	0.346623	7
bun	0.868238	0	0.316969	7
zen2	0.641865	0	0.299176	7
zen	0.941732	0	0.10346	7
Nek2	0.813841	0	0.505107	8
CG43394	0.930475	0	0.352554	8
cad	0.768418	0	0.310379	8
fj	0.851588	0	0.279736	8
hb	0.951825	0	0.225371	8
ken	0.875557	0	0.0998353	8
prd	0.747496	0	0.468204	9
eve	0.75197	0	0.417792	9
h	0.665541	0	0.369028	9
Esp	0.816495	0	0.29061	9
nub	0.947832	0	0.287644	9
dpn	0.679275	0	0.275453	9
aay	0.909309	0	0.207908	10
hkb	0.937733	0	0.205601	10
exex	0.885895	0	0.196376	10
peb	0.880502	0	0.152224	10
srp	0.936663	0	0.0797364	10
pxb	0.731997	0	0.402636	11
kni	0.940616	0	0.252389	11
knrl	0.963505	0	0.224053	11
Mdr49	0.911027	0	0.200988	11
croc	0.934196	0	0.177265	11
ftz	0.757703	0	0.464909	12
run	0.761076	0	0.354201	12
odd	0.699364	0	0.304119	12
trn	0.697217	0	0.262603	12
tsh	0.973527	0	0.414498	13
Antp	0.845045	0	0.198682	13
Kr	0.965007	0	0.157166	13
rho	0.914468	0	0.420428	14
E.spl.m5.HLH	0.839021	0	0.292257	14
toc	0.868312	0	0.259638	14
