# Supplementary material for: Characterizing spatial gene expression heterogeneity in spatially resolved single-cell transcriptomic data with nonuniform cellular densities
Source: Genome Res. 2021 Oct;31(10):1843–55. doi: 10.1101/gr.271288.120 (PMC8494224; doi:10.1101/gr.271288.120)
Supplement: Supplemental Material [file supp_gr.271288.120_Supplemental_Table_S5.xlsx]

## Sheet: mPOA_Astrocyte-FN7_9
# Supplemental Table S5. MERINGUE results for MERFISH data of the mouse pre-optic region. Detailed results for each cell-type in one representative animal for one representative tissue layer is shown. Summary results across all tissue layers and all animals is provided as a column annotation.
gene	observed	expected	sd	p.value	p.adj	minPercentCells	X10.	X90.	FINAL
Aldh1l1	0.1702362608	-0.001642036	0.02380225	2.579048e-13	3.332924e-12	0.05409836	0.960724000	1.558780000	FALSE
Aqp4	0.2002209728	-0.001642036	0.02383970	0.000000e+00	0.000000e+00	0.08360656	0.868283000	1.595000000	TRUE
Ar	0.0601686668	-0.001642036	0.02385453	4.782765e-03	1.785565e-02	0.04262295	0.000000000	0.509835000	FALSE
Calcr	0.1049516765	-0.001642036	0.02368927	3.403065e-06	2.598704e-05	0.06065574	0.000000000	0.331946000	FALSE
Cbln2	0.0544732955	-0.001642036	0.02391824	9.484699e-03	3.390275e-02	0.06885246	0.000000000	0.790722000	FALSE
Cd24a	0.0606450513	-0.001642036	0.02385213	4.508815e-03	1.721547e-02	0.05409836	0.000000000	0.507806000	FALSE
Cspg5	0.2025945440	-0.001642036	0.02386312	0.000000e+00	0.000000e+00	0.11803279	0.637391000	1.374110000	TRUE
Cxcl14	0.1126774472	-0.001642036	0.02382707	8.017568e-07	6.734757e-06	0.06557377	0.844374000	1.477440000	TRUE
Ermn	0.0504620586	-0.001642036	0.02368121	1.389532e-02	4.668826e-02	0.04262295	0.000000000	0.318759000	FALSE
Esr1	0.0500763130	-0.001642036	0.02379082	1.485714e-02	4.820982e-02	0.04590164	0.000000000	0.411312000	FALSE
Gabrg1	0.0641074562	-0.001642036	0.02392077	2.992190e-03	1.196876e-02	0.08360656	0.000000000	0.788378000	TRUE
Gad1	0.1048790055	-0.001642036	0.02389719	4.146587e-06	3.028812e-05	0.06393443	0.000000000	0.929048000	FALSE
Gbx2	0.0493770818	-0.001642036	0.02376585	1.590695e-02	4.858851e-02	0.04754098	0.000000000	0.323535000	FALSE
Igf1r	0.0872477123	-0.001642036	0.02391811	1.010324e-04	4.992189e-04	0.09672131	0.000000000	1.089360000	FALSE
Irs4	0.0939634490	-0.001642036	0.02389805	3.159700e-05	1.769432e-04	0.06721311	0.000000000	0.828444000	TRUE
Lpar1	0.0712175605	-0.001642036	0.02383307	1.117525e-03	4.693607e-03	0.04426230	0.000000000	0.469301000	FALSE
Mlc1	0.0809387720	-0.001642036	0.02374112	2.522197e-04	1.210655e-03	0.05737705	1.206110000	1.709270000	TRUE
Ndrg1	0.0588170119	-0.001642036	0.02387695	5.668931e-03	2.070392e-02	0.04918033	0.000000000	0.709719000	FALSE
Necab1	0.0743009230	-0.001642036	0.02382953	7.189668e-04	3.185261e-03	0.04754098	0.000000000	0.420219000	FALSE
Npy1r	0.0960839787	-0.001642036	0.02387903	2.133320e-05	1.235855e-04	0.06229508	0.000000000	0.464740000	FALSE
Pak3	0.0720328994	-0.001642036	0.02391884	1.034289e-03	4.455398e-03	0.08852459	0.000000000	0.829630000	TRUE
Pgr	0.0695855360	-0.001642036	0.02380409	1.384689e-03	5.673848e-03	0.05245902	0.000000000	0.375723000	FALSE
Plin3	0.0503143498	-0.001642036	0.02391931	1.492209e-02	4.820982e-02	0.06885246	0.000000000	0.814551000	FALSE
Ramp3	0.0620346879	-0.001642036	0.02358269	3.465443e-03	1.353940e-02	0.02295082	0.000000000	0.000000000	FALSE
Serpine1	0.0492054643	-0.001642036	0.02367611	1.587162e-02	4.858851e-02	0.03278689	0.000000000	0.211222000	FALSE
Sox6	0.0538030443	-0.001642036	0.02392177	1.023101e-02	3.580855e-02	0.07704918	0.000000000	0.958866000	FALSE
Syt2	0.1002721708	-0.001642036	0.02376204	8.976000e-06	5.799877e-05	0.05245902	0.000000000	0.381718000	FALSE
Traf4	0.0524620992	-0.001642036	0.02391714	1.184410e-02	4.060836e-02	0.07868852	0.000000000	0.834191000	FALSE
Ttyh2	0.1008726031	-0.001642036	0.02387169	8.758205e-06	5.799877e-05	0.06557377	0.518765000	1.311310000	TRUE
Blank-4	0.0480361490	-0.001642036	0.02312333	1.584097e-02	4.858851e-02	0.01639344	0.000000000	0.000000000	FALSE
Oxt	0.0632298693	-0.001642036	0.02035951	7.204758e-04	3.185261e-03	0.02131148	-0.025239500	-0.006035320	FALSE
Penk	0.0881681397	-0.001642036	0.02331718	5.865675e-05	3.079479e-04	0.03934426	-0.035902500	0.000739852	FALSE
Tac1	0.0904638638	-0.001642036	0.02309238	3.323431e-05	1.801085e-04	0.05737705	-0.014893700	0.009886450	FALSE
Gal	0.0942022504	-0.001642036	0.02325833	1.887312e-05	1.132387e-04	0.02950820	-0.018933200	0.009852750	FALSE
Cartpt	0.0881420637	-0.001642036	0.02358989	7.060435e-05	3.594403e-04	0.05245902	-0.012794200	0.001769760	FALSE
Vgf	0.1043018010	-0.001642036	0.02353715	3.379605e-06	2.598704e-05	0.05245902	-0.044263100	0.013711100	FALSE
Trh	0.0949209708	-0.001642036	0.02333773	1.754521e-05	1.091702e-04	0.05573770	-0.008257350	0.012555800	FALSE
Nts	0.2881230024	-0.001642036	0.02335672	0.000000e+00	0.000000e+00	0.05737705	-0.017466300	0.013175200	FALSE
Scg2	0.2201823825	-0.001642036	0.02346624	0.000000e+00	0.000000e+00	0.06721311	-0.077421700	-0.020755200	FALSE
Avp	0.1445079409	-0.001642036	0.02239949	3.406875e-11	4.088250e-10	0.05737705	-0.025233000	0.007078200	FALSE
Gnrh1	0.0611047563	-0.001642036	0.01438517	6.446605e-06	4.512623e-05	0.01311475	0.000427089	0.012158000	FALSE
Vip	0.1459714789	-0.001642036	0.01609784	0.000000e+00	0.000000e+00	0.02622951	-0.012859400	0.011628300	FALSE
Tac2	0.1287655262	-0.001642036	0.02337207	1.205132e-08	1.190954e-07	0.07868852	-0.012301900	0.009682340	FALSE
Cck	0.1417404221	-0.001642036	0.02361166	6.295608e-10	7.051081e-09	0.08032787	0.001646040	0.014718000	FALSE
Crh	0.2054578429	-0.001642036	0.02301990	0.000000e+00	0.000000e+00	0.05245902	-0.010407500	0.011227000	FALSE
Ucn3	0.0778012178	-0.001642036	0.02355255	3.717418e-04	1.734795e-03	0.05409836	-0.002057720	0.008329050	FALSE
Adcyap1	0.1216281283	-0.001642036	0.02047478	8.689326e-10	9.123792e-09	0.04590164	-0.015092700	0.011049800	FALSE
Nnat	0.3542861750	-0.001642036	0.02380567	0.000000e+00	0.000000e+00	0.15901639	-0.038967500	0.046333300	FALSE
Sln	0.3206729068	-0.001642036	0.02387020	0.000000e+00	0.000000e+00	0.13606557	-0.062229400	0.105713000	TRUE
Mbp	0.5095629153	-0.001642036	0.02375179	0.000000e+00	0.000000e+00	0.13770492	-0.082391000	0.038619100	FALSE
Arpp21	0.2223447989	-0.001642036	0.02387283	0.000000e+00	0.000000e+00	0.13278689	-0.087101700	0.010835200	FALSE
Fos	0.1864614211	-0.001642036	0.02383711	1.443290e-15	2.020606e-14	0.11803279	-0.076456200	-0.016681600	FALSE
Th	0.1156381763	-0.001642036	0.02322712	2.217413e-07	1.960660e-06	0.03114754	-0.055721100	0.005324990	FALSE
polyT	0.2010311831	-0.001642036	0.02385419	0.000000e+00	0.000000e+00	0.10655738	3.398300000	3.784980000	FALSE
DAPI	0.1224614935	-0.001642036	0.02366850	7.881962e-08	7.356498e-07	0.05245902	3.929680000	4.388410000	FALSE
4732456N10Rik	-0.0280972629	-0.001642036	0.02360300	8.688223e-01	9.065972e-01				FALSE
Ace2	-0.0311857142	-0.001642036	0.02348201	8.958296e-01	9.100604e-01				FALSE
Adora2a	-0.0043809840	-0.001642036	0.02370785	5.459871e-01	6.896680e-01				FALSE
Amigo2	0.0291128904	-0.001642036	0.02391664	9.923522e-02	2.083940e-01				TRUE
Ano3	0.0063780295	-0.001642036	0.02379341	3.680318e-01	5.423626e-01				FALSE
Arhgap36	0.0058125753	-0.001642036	0.02386182	3.773654e-01	5.477736e-01				FALSE
Avpr1a	-0.0317883119	-0.001642036	0.02362129	8.990635e-01	9.100604e-01				FALSE
Avpr2	-0.0375877947	-0.001642036	0.02367001	9.355710e-01	9.355710e-01				FALSE
Baiap2	-0.0153682565	-0.001642036	0.02390997	7.170429e-01	8.084780e-01				FALSE
Bdnf	-0.0010411216	-0.001642036	0.02378545	4.899222e-01	6.282972e-01				FALSE
Bmp7	0.0361962696	-0.001642036	0.02392373	5.686790e-02	1.447547e-01				TRUE
Brs3	0.0083476635	-0.001642036	0.02355538	3.357485e-01	5.036228e-01				FALSE
Cbln1	0.0169624205	-0.001642036	0.02366337	2.158712e-01	3.555526e-01				FALSE
Cckar	0.0118881827	-0.001642036	0.02386419	2.853682e-01	4.398335e-01				FALSE
Cckbr	-0.0001986216	-0.001642036	0.02382277	4.758430e-01	6.282972e-01				FALSE
Ccnd2	0.0155554295	-0.001642036	0.02385297	2.354615e-01	3.803609e-01				FALSE
Cdkn1a	-0.0171191788	-0.001642036	0.02388529	7.415004e-01	8.304804e-01				TRUE
Cenpe	0.0226982577	-0.001642036	0.02382451	1.534735e-01	2.833356e-01				FALSE
Chat	-0.0068359035	-0.001642036	0.02376055	5.865161e-01	7.099932e-01				FALSE
Coch	0.0287054475	-0.001642036	0.02373845	1.005524e-01	2.084935e-01				FALSE
Col25a1	0.0266382886	-0.001642036	0.02377043	1.170768e-01	2.341536e-01				FALSE
Cplx3	-0.0145096413	-0.001642036	0.02368472	7.065339e-01	8.020115e-01				FALSE
Cpne5	-0.0069067444	-0.001642036	0.02382746	5.874348e-01	7.099932e-01				FALSE
Creb3l1	-0.0299605723	-0.001642036	0.02389326	8.820328e-01	9.090891e-01				FALSE
Crhbp	0.0170441992	-0.001642036	0.02345807	2.128474e-01	3.540432e-01				FALSE
Crhr1	0.0284293185	-0.001642036	0.02364918	1.017647e-01	2.084935e-01				FALSE
Crhr2	0.0256958320	-0.001642036	0.02352832	1.226354e-01	2.395668e-01				FALSE
Cyp19a1	0.0216978083	-0.001642036	0.02348157	1.601201e-01	2.923932e-01				FALSE
Cyp26a1	0.0456081228	-0.001642036	0.02344411	2.192935e-02	6.419458e-02				FALSE
Cyr61	0.0044116944	-0.001642036	0.02391794	4.000939e-01	5.663975e-01				FALSE
Dgkk	0.0252572697	-0.001642036	0.02387179	1.299084e-01	2.452204e-01				FALSE
Ebf3	0.0313239952	-0.001642036	0.02327104	7.829825e-02	1.771058e-01				FALSE
Egr2	-0.0217521094	-0.001642036	0.02378723	8.010603e-01	8.795957e-01				FALSE
Etv1	0.0332270419	-0.001642036	0.02389888	7.227900e-02	1.710264e-01				FALSE
Fbxw13	-0.0272522554	-0.001642036	0.02360779	8.609994e-01	9.065972e-01				FALSE
Fezf1	0.0323553328	-0.001642036	0.02368938	7.562489e-02	1.740409e-01				FALSE
Fn1	-0.0318831789	-0.001642036	0.02367852	8.992263e-01	9.100604e-01				FALSE
Fst	0.0433801986	-0.001642036	0.02384760	2.951872e-02	8.129746e-02				FALSE
Gabra1	-0.0250136546	-0.001642036	0.02380534	8.368960e-01	8.955320e-01				FALSE
Galr1	0.0325936354	-0.001642036	0.02370043	7.429682e-02	1.733593e-01				FALSE
Galr2	-0.0290692255	-0.001642036	0.02378318	8.755896e-01	9.080188e-01				FALSE
Gda	0.0345963544	-0.001642036	0.02384764	6.430831e-02	1.588793e-01				FALSE
Gem	0.0406923168	-0.001642036	0.02375615	3.737153e-02	9.810025e-02				FALSE
Gjc3	-0.0335591571	-0.001642036	0.02385318	9.095625e-01	9.150090e-01				FALSE
Glra3	0.0199965433	-0.001642036	0.02379703	1.815965e-01	3.253422e-01				FALSE
Gpr165	0.0041320346	-0.001642036	0.02390514	4.045679e-01	5.663975e-01				FALSE
Greb1	0.0042700398	-0.001642036	0.02352609	4.007916e-01	5.663975e-01				FALSE
Grpr	-0.0108284891	-0.001642036	0.02371477	6.507598e-01	7.699130e-01				FALSE
Htr2c	0.0267269912	-0.001642036	0.02379087	1.165457e-01	2.341536e-01				FALSE
Igf2r	-0.0001128749	-0.001642036	0.02387459	4.744653e-01	6.282972e-01				FALSE
Isl1	-0.0252786499	-0.001642036	0.02345032	8.432593e-01	8.966302e-01				FALSE
Kiss1r	-0.0063711801	-0.001642036	0.02370495	5.790643e-01	7.099932e-01				FALSE
Klf4	-0.0101675350	-0.001642036	0.02368037	6.405854e-01	7.632506e-01				FALSE
Lepr	-0.0006241372	-0.001642036	0.02360954	4.828054e-01	6.282972e-01				FALSE
Lmod1	0.0005786038	-0.001642036	0.02351520	4.623821e-01	6.264532e-01				FALSE
Man1a	0.0190141051	-0.001642036	0.02374020	1.921253e-01	3.362192e-01				FALSE
Mc4r	0.0013218810	-0.001642036	0.02373953	4.503205e-01	6.150719e-01				FALSE
Mki67	0.0421775569	-0.001642036	0.02376310	3.259024e-02	8.830904e-02				FALSE
Myh11	0.0105551692	-0.001642036	0.02360001	3.026373e-01	4.622096e-01				FALSE
Ndnf	0.0122471484	-0.001642036	0.02380619	2.798028e-01	4.393165e-01				FALSE
Nos1	-0.0051052625	-0.001642036	0.02386861	5.576822e-01	6.991837e-01				FALSE
Npas1	0.0315845046	-0.001642036	0.02366108	8.011928e-02	1.771058e-01				FALSE
Npy2r	0.0091915123	-0.001642036	0.02384144	3.247705e-01	4.915445e-01				FALSE
Ntng1	-0.0133638768	-0.001642036	0.02377446	6.890090e-01	7.928323e-01				FALSE
Ntsr1	-0.0137444471	-0.001642036	0.02367338	6.954031e-01	7.947464e-01				FALSE
Nup62cl	0.0040093171	-0.001642036	0.02339751	4.045697e-01	5.663975e-01				FALSE
Omp	0.0257182242	-0.001642036	0.02381972	1.253524e-01	2.420598e-01				FALSE
Onecut2	0.0119345628	-0.001642036	0.02384059	2.845172e-01	4.398335e-01				FALSE
Opalin	-0.0122531646	-0.001642036	0.02365830	6.731096e-01	7.849456e-01				FALSE
Oprd1	0.0019418477	-0.001642036	0.02376765	4.400714e-01	6.059999e-01				FALSE
Oprk1	0.0349688304	-0.001642036	0.02381066	6.207528e-02	1.556515e-01				FALSE
Oprl1	-0.0232415931	-0.001642036	0.02386924	8.172440e-01	8.857870e-01				FALSE
Oxtr	0.0339026904	-0.001642036	0.02366651	6.656151e-02	1.620628e-01				FALSE
Pcdh11x	0.0200546522	-0.001642036	0.02390475	1.820367e-01	3.253422e-01				FALSE
Pdgfra	-0.0228929124	-0.001642036	0.02368528	8.151989e-01	8.857870e-01				FALSE
Pnoc	0.0419743235	-0.001642036	0.02386087	3.377891e-02	9.007708e-02				FALSE
Pou3f2	0.0441747767	-0.001642036	0.02391738	2.770621e-02	7.850756e-02				TRUE
Prlr	0.0336748046	-0.001642036	0.02372282	6.827938e-02	1.638705e-01				FALSE
Rgs2	-0.0065154294	-0.001642036	0.02382790	5.810282e-01	7.099932e-01				FALSE
Rgs5	0.0193317925	-0.001642036	0.02369405	1.880260e-01	3.325092e-01				FALSE
Rnd3	0.0253650151	-0.001642036	0.02391537	1.293907e-01	2.452204e-01				FALSE
Rxfp1	-0.0061061835	-0.001642036	0.02348319	5.753845e-01	7.099932e-01				FALSE
Scgn	-0.0236512294	-0.001642036	0.02377242	8.227326e-01	8.860197e-01				FALSE
Selplg	0.0296276660	-0.001642036	0.02380368	9.448203e-02	2.009238e-01				FALSE
Sema3c	0.0187505890	-0.001642036	0.02367693	1.945400e-01	3.369353e-01				FALSE
Sema4d	0.0488567874	-0.001642036	0.02392226	1.738808e-02	5.216424e-02				TRUE
Serpinb1b	-0.0277981785	-0.001642036	0.02352815	8.668654e-01	9.065972e-01				FALSE
Sgk1	0.0034349834	-0.001642036	0.02380923	4.155709e-01	5.769910e-01				FALSE
Slc15a3	0.0171428093	-0.001642036	0.02354863	2.125210e-01	3.540432e-01				FALSE
Slc17a6	0.0314508123	-0.001642036	0.02389940	8.307628e-02	1.812573e-01				FALSE
Slc17a7	0.0072915058	-0.001642036	0.02353592	3.521321e-01	5.235238e-01				FALSE
Slc17a8	-0.0010259867	-0.001642036	0.02352849	4.895556e-01	6.282972e-01				FALSE
Slc18a2	0.0459096539	-0.001642036	0.02364572	2.216241e-02	6.419458e-02				FALSE
Slco1a4	-0.0126304991	-0.001642036	0.02385315	6.774828e-01	7.849456e-01				FALSE
Sox4	0.0162754624	-0.001642036	0.02391490	2.268626e-01	3.700283e-01				FALSE
Sox8	0.0300431330	-0.001642036	0.02389187	9.238831e-02	1.989902e-01				TRUE
Sp9	0.0436102789	-0.001642036	0.02368688	2.803841e-02	7.850756e-02				FALSE
Synpr	0.0318494611	-0.001642036	0.02373088	7.907741e-02	1.771058e-01				FALSE
Syt4	0.0131809730	-0.001642036	0.02387194	2.673200e-01	4.251383e-01				FALSE
Sytl4	0.0260962334	-0.001642036	0.02385500	1.224581e-01	2.395668e-01				FALSE
Tacr1	0.0056863394	-0.001642036	0.02362872	3.782246e-01	5.477736e-01				FALSE
Tacr3	-0.0004044773	-0.001642036	0.02386394	4.793205e-01	6.282972e-01				FALSE
Tiparp	0.0174252524	-0.001642036	0.02392099	2.126981e-01	3.540432e-01				FALSE
Tmem108	0.0181326893	-0.001642036	0.02386435	2.036568e-01	3.491260e-01				FALSE
Trhr	-0.0113868762	-0.001642036	0.02351310	6.607252e-01	7.762366e-01				FALSE
Ttn	-0.0089060197	-0.001642036	0.02343500	6.217055e-01	7.460466e-01				FALSE
Blank-1	-0.0020653687	-0.001642036	0.02378094	5.071013e-01	6.454017e-01				FALSE
Blank-2	-0.0208470915	-0.001642036	0.02310095	7.971130e-01	8.795957e-01				FALSE
Blank-3	-0.0212783405	-0.001642036	0.02356667	7.976407e-01	8.795957e-01				FALSE
Blank-5	-0.0004701283	-0.001642036	0.02383144	4.803900e-01	6.282972e-01				FALSE
Sst	0.0350315841	-0.001642036	0.02088822	3.956914e-02	1.022710e-01				FALSE
Npas4	0.0113687174	-0.001642036	0.02104828	2.682420e-01	4.251383e-01				FALSE
Egr1	0.0211995653	-0.001642036	0.02064826	1.343148e-01	2.507209e-01				FALSE

## Sheet: mPOA_Endothelial_Lepr-FN7_3
gene	observed	expected	sd	p.value	p.adj	minPercentCells	X10.	X90.	FINAL
Adora2a	0.1965574179	-0.005405405	0.05006268	2.739443e-05	1.022725e-04	0.12903226	0.00000000	0.70210000	FALSE
Aldh1l1	0.1907213756	-0.005405405	0.05000501	4.388253e-05	1.535889e-04	0.12365591	0.00000000	0.91039000	FALSE
Aqp4	0.3091728133	-0.005405405	0.04951832	1.057402e-10	7.401814e-10	0.07526882	0.00000000	0.84630000	FALSE
Ar	0.1115719036	-0.005405405	0.04964349	9.227827e-03	2.348902e-02	0.08064516	0.00000000	0.45021500	FALSE
Bmp7	0.2657893233	-0.005405405	0.04997515	2.872025e-08	1.556452e-07	0.19354839	0.34387500	1.64845000	FALSE
Cckar	0.1811154593	-0.005405405	0.05008932	9.813690e-05	3.297400e-04	0.15591398	0.00000000	0.60972500	FALSE
Ccnd2	0.1101235894	-0.005405405	0.05007234	1.052067e-02	2.599223e-02	0.09139785	0.00000000	0.81459000	FALSE
Cdkn1a	0.1303278016	-0.005405405	0.04992852	3.278430e-03	8.883487e-03	0.08602151	0.00000000	0.68297000	FALSE
Col25a1	0.1989066812	-0.005405405	0.04863907	1.331187e-05	5.200917e-05	0.04838710	0.00000000	0.28638500	FALSE
Cspg5	0.2032250350	-0.005405405	0.04985021	1.424909e-05	5.440562e-05	0.08602151	0.00000000	0.62826000	FALSE
Cxcl14	0.2853895737	-0.005405405	0.04982547	2.669093e-09	1.660769e-08	0.08602151	0.00000000	0.60441000	FALSE
Cyr61	0.2256249555	-0.005405405	0.04955944	1.568178e-06	6.932998e-06	0.07526882	0.00000000	0.56602500	FALSE
Ermn	0.1330787491	-0.005405405	0.04902392	2.365299e-03	6.622836e-03	0.03763441	0.00000000	0.35424500	FALSE
Fn1	0.2574217856	-0.005405405	0.05008558	7.706238e-08	4.045775e-07	0.17741935	0.00000000	1.77565000	FALSE
Gabrg1	0.1896427359	-0.005405405	0.04902731	3.469654e-05	1.267178e-04	0.05913978	0.00000000	0.23802500	FALSE
Gad1	0.2277328152	-0.005405405	0.04936492	1.163378e-06	5.748456e-06	0.08064516	0.00000000	0.40751000	FALSE
Galr2	0.0963015827	-0.005405405	0.04985133	2.066490e-02	4.568032e-02	0.06451613	0.00000000	0.42409000	FALSE
Gem	0.1031132997	-0.005405405	0.04920253	1.370772e-02	3.198467e-02	0.06451613	0.00000000	0.27959000	FALSE
Gpr165	0.0999157918	-0.005405405	0.04999540	1.757537e-02	3.990084e-02	0.09677419	0.00000000	0.53828500	FALSE
Greb1	0.1031631219	-0.005405405	0.04893307	1.325307e-02	3.180737e-02	0.04838710	0.00000000	0.29983000	FALSE
Igf1r	0.2848573116	-0.005405405	0.04998790	3.186577e-09	1.911946e-08	0.13978495	0.00000000	1.08960000	FALSE
Irs4	0.1155009146	-0.005405405	0.04967093	7.463478e-03	1.959163e-02	0.04838710	0.00000000	0.44958000	FALSE
Klf4	0.1915341609	-0.005405405	0.05003808	4.146104e-05	1.482012e-04	0.17204301	0.00000000	0.93955500	FALSE
Lepr	0.2269182940	-0.005405405	0.05009365	1.760793e-06	7.584956e-06	0.15591398	0.00000000	0.88038500	FALSE
Lmod1	0.2335768305	-0.005405405	0.05004696	8.978229e-07	4.570735e-06	0.18817204	0.00000000	0.85902000	FALSE
Lpar1	0.3129161299	-0.005405405	0.05003522	9.960499e-11	7.275495e-10	0.20967742	0.00000000	1.12760000	FALSE
Man1a	0.1089375870	-0.005405405	0.05002006	1.112880e-02	2.709621e-02	0.11290323	0.00000000	0.79472500	FALSE
Mlc1	0.5363052904	-0.005405405	0.04985530	0.000000e+00	0.000000e+00	0.12903226	0.00000000	1.05160000	TRUE
Myh11	0.4180143952	-0.005405405	0.04985027	0.000000e+00	0.000000e+00	0.12903226	0.00000000	1.15055000	TRUE
Necab1	0.2084228297	-0.005405405	0.04981855	8.847918e-06	3.539167e-05	0.10215054	0.00000000	0.66591000	FALSE
Nos1	0.1383464441	-0.005405405	0.04909782	1.706485e-03	5.119456e-03	0.04838710	0.00000000	0.29938000	FALSE
Npy1r	0.2296374761	-0.005405405	0.05006212	1.332874e-06	6.051969e-06	0.14516129	0.00000000	0.73539500	FALSE
Omp	0.2908303615	-0.005405405	0.05000872	1.574052e-09	1.017080e-08	0.19354839	0.00000000	0.87025500	TRUE
Opalin	0.0939458643	-0.005405405	0.04921072	2.174906e-02	4.745251e-02	0.06451613	0.00000000	0.21673500	FALSE
Pak3	0.1739068513	-0.005405405	0.05005163	1.701310e-04	5.496541e-04	0.14516129	0.00000000	0.62135000	FALSE
Pdgfra	0.3384998045	-0.005405405	0.05004932	3.180345e-12	2.544276e-11	0.21505376	0.00000000	1.31875000	TRUE
Plin3	0.1104905851	-0.005405405	0.05009641	1.034871e-02	2.594900e-02	0.12365591	0.00000000	0.92424500	FALSE
Pou3f2	0.1155325866	-0.005405405	0.04903340	6.823159e-03	1.819509e-02	0.05913978	0.00000000	0.20130500	FALSE
Rgs5	0.6752032407	-0.005405405	0.04977375	0.000000e+00	0.000000e+00	0.14516129	0.00000000	1.37020000	TRUE
Rnd3	0.1387247916	-0.005405405	0.04988633	1.931287e-03	5.692214e-03	0.07526882	0.00000000	0.58151500	FALSE
Serpine1	0.1363269864	-0.005405405	0.04971001	2.177838e-03	6.201300e-03	0.08064516	0.00000000	0.42967500	FALSE
Sgk1	0.1769148213	-0.005405405	0.04998966	1.325781e-04	4.367278e-04	0.11827957	0.00000000	0.99842000	FALSE
Slc18a2	0.2509979683	-0.005405405	0.04490980	5.672197e-09	3.285962e-08	0.05376344	0.00000000	0.20102500	FALSE
Slco1a4	0.2292942942	-0.005405405	0.04977866	1.209350e-06	5.804879e-06	0.05913978	0.00000000	0.97180500	FALSE
Sox4	0.1043636261	-0.005405405	0.04994446	1.398090e-02	3.217523e-02	0.08064516	0.00000000	0.89188500	FALSE
Sox6	0.1116154553	-0.005405405	0.04947842	9.012870e-03	2.329480e-02	0.06989247	0.00000000	0.36262000	FALSE
Sox8	0.1507804568	-0.005405405	0.04968162	8.340304e-04	2.594761e-03	0.05913978	0.00000000	0.43840000	FALSE
Sp9	0.1465681494	-0.005405405	0.04892874	9.481252e-04	2.896091e-03	0.05376344	0.00000000	0.20751000	FALSE
Tiparp	0.1049683282	-0.005405405	0.04994542	1.355651e-02	3.198467e-02	0.07526882	0.00000000	0.56690000	FALSE
Tmem108	0.0977569698	-0.005405405	0.04996010	1.946646e-02	4.360488e-02	0.04838710	0.00000000	0.43553500	FALSE
Ttyh2	0.1300973328	-0.005405405	0.04952349	3.108314e-03	8.560604e-03	0.08602151	0.00000000	0.45915000	FALSE
Oxt	0.1376131706	-0.005405405	0.04998008	2.108131e-03	6.106309e-03	0.11290323	-0.03376400	-0.00272340	FALSE
Penk	0.5166512442	-0.005405405	0.04912265	0.000000e+00	0.000000e+00	0.31182796	-0.02185050	0.02117000	FALSE
Sst	0.1633573997	-0.005405405	0.04979100	3.501982e-04	1.110062e-03	0.11827957	-0.01413050	0.00371400	FALSE
Tac1	0.6761397621	-0.005405405	0.04966287	0.000000e+00	0.000000e+00	0.22043011	-0.02549650	0.05146500	FALSE
Gal	0.3319556953	-0.005405405	0.04964929	5.419998e-12	4.138907e-11	0.18817204	-0.00264940	0.01011700	FALSE
Cartpt	0.6437363033	-0.005405405	0.04971241	0.000000e+00	0.000000e+00	0.24193548	-0.01335700	0.03789100	FALSE
Npas4	0.1754801714	-0.005405405	0.04771134	7.494576e-05	2.569569e-04	0.05913978	-0.01205450	0.00839340	FALSE
Vgf	0.4648534757	-0.005405405	0.04966328	0.000000e+00	0.000000e+00	0.13978495	-0.06650000	-0.02524000	FALSE
Trh	0.2217800160	-0.005405405	0.04924710	1.982836e-06	8.327910e-06	0.12365591	-0.00534215	0.01682200	FALSE
Scg2	0.5546651945	-0.005405405	0.04989823	0.000000e+00	0.000000e+00	0.30107527	-0.07323600	-0.00314080	FALSE
Avp	0.5469610605	-0.005405405	0.04999745	0.000000e+00	0.000000e+00	0.34408602	-0.02650450	0.01910200	FALSE
Gnrh1	0.2778950022	-0.005405405	0.04654061	5.746345e-10	3.861544e-09	0.10215054	0.00391195	0.03490750	FALSE
Egr1	0.2231934963	-0.005405405	0.04855397	1.249937e-06	5.833041e-06	0.09677419	-0.01283550	0.00790605	FALSE
Tac2	0.5922339159	-0.005405405	0.04992266	0.000000e+00	0.000000e+00	0.32795699	-0.00645780	0.01896450	FALSE
Cck	0.4717635530	-0.005405405	0.04977950	0.000000e+00	0.000000e+00	0.23118280	0.00706230	0.02563600	FALSE
Crh	0.4641501277	-0.005405405	0.04992679	0.000000e+00	0.000000e+00	0.24193548	-0.00701440	0.01438700	FALSE
Ucn3	0.5649748035	-0.005405405	0.04976683	0.000000e+00	0.000000e+00	0.24193548	0.00270685	0.02946850	FALSE
Adcyap1	0.2205003392	-0.005405405	0.04946469	2.473652e-06	1.013594e-05	0.11827957	-0.00402065	0.01088100	FALSE
Nnat	0.5416149641	-0.005405405	0.04971656	0.000000e+00	0.000000e+00	0.15591398	-0.04470100	0.30625000	FALSE
Sln	0.7305701071	-0.005405405	0.05008758	0.000000e+00	0.000000e+00	0.39784946	-0.40345000	0.43489500	TRUE
Mbp	0.3346230128	-0.005405405	0.04699127	2.310374e-13	1.940714e-12	0.13978495	-0.26383000	-0.16394000	FALSE
Arpp21	0.6829574338	-0.005405405	0.04998228	0.000000e+00	0.000000e+00	0.32795699	-0.02551600	0.12234500	FALSE
Fos	0.2647558777	-0.005405405	0.04973976	2.794193e-08	1.556452e-07	0.17204301	-0.05583300	0.00372950	FALSE
Th	0.3976916548	-0.005405405	0.04811446	0.000000e+00	0.000000e+00	0.13440860	-0.08015150	0.03109200	FALSE
polyT	0.4705477320	-0.005405405	0.04942436	0.000000e+00	0.000000e+00	0.20430108	3.48000000	3.87115000	TRUE
DAPI	0.5093943348	-0.005405405	0.04965085	0.000000e+00	0.000000e+00	0.27419355	4.04175000	4.66240000	TRUE
4732456N10Rik	-0.0092287832	-0.005405405	0.04938553	5.308549e-01	6.557619e-01				FALSE
Ace2	0.0597484855	-0.005405405	0.04843438	8.928047e-02	1.683439e-01				FALSE
Amigo2	0.0417003691	-0.005405405	0.05000487	1.730903e-01	2.840434e-01				FALSE
Ano3	0.0204311588	-0.005405405	0.04864813	2.976780e-01	4.202513e-01				FALSE
Arhgap36	-0.0239298399	-0.005405405	0.04926611	6.465444e-01	7.649258e-01				FALSE
Avpr1a	-0.0481667495	-0.005405405	0.04942193	8.065438e-01	8.575908e-01				FALSE
Avpr2	0.0645670553	-0.005405405	0.04935517	7.813434e-02	1.508801e-01				FALSE
Baiap2	0.0388597010	-0.005405405	0.05008917	1.884221e-01	3.043741e-01				FALSE
Bdnf	-0.0435759873	-0.005405405	0.04894475	7.822665e-01	8.424409e-01				FALSE
Brs3	-0.0269459989	-0.005405405	0.04957258	6.680469e-01	7.848383e-01				FALSE
Calcr	0.0691325127	-0.005405405	0.04813457	6.074714e-02	1.214943e-01				FALSE
Cbln1	-0.0088087595	-0.005405405	0.04686632	5.289451e-01	6.557619e-01				FALSE
Cbln2	0.0594197484	-0.005405405	0.05011178	9.789990e-02	1.768514e-01				FALSE
Cckbr	0.0346755260	-0.005405405	0.04923501	2.078013e-01	3.317979e-01				FALSE
Cd24a	-0.0288337469	-0.005405405	0.04933246	6.825734e-01	7.908437e-01				FALSE
Cenpe	-0.0280916580	-0.005405405	0.05000556	6.749685e-01	7.874632e-01				FALSE
Chat	0.0582846929	-0.005405405	0.04950096	9.910925e-02	1.771314e-01				FALSE
Coch	0.0591100251	-0.005405405	0.04914526	9.463363e-02	1.737840e-01				FALSE
Cplx3	0.0465485210	-0.005405405	0.04881475	1.435946e-01	2.436757e-01				FALSE
Cpne5	0.0342936737	-0.005405405	0.04909101	2.093487e-01	3.317979e-01				FALSE
Creb3l1	0.0735167769	-0.005405405	0.04991443	5.692193e-02	1.152155e-01				FALSE
Crhbp	-0.0401915394	-0.005405405	0.04701447	7.703205e-01	8.417030e-01				FALSE
Crhr1	0.0003485107	-0.005405405	0.04889227	4.531584e-01	5.947704e-01				FALSE
Crhr2	0.0322347920	-0.005405405	0.04913636	2.218276e-01	3.418027e-01				FALSE
Cyp19a1	0.0768925153	-0.005405405	0.04933725	4.765104e-02	1.000672e-01				FALSE
Cyp26a1	-0.0425233443	-0.005405405	0.04879674	7.765712e-01	8.417030e-01				FALSE
Dgkk	0.0562478623	-0.005405405	0.04931308	1.056056e-01	1.867552e-01				FALSE
Ebf3	-0.0339235386	-0.005405405	0.04673940	7.291194e-01	8.166138e-01				FALSE
Egr2	0.0177557360	-0.005405405	0.04959031	3.202321e-01	4.446198e-01				FALSE
Esr1	-0.0317043084	-0.005405405	0.04825496	7.071229e-01	7.972929e-01				FALSE
Etv1	0.0419834075	-0.005405405	0.04994585	1.713602e-01	2.840434e-01				FALSE
Fbxw13	0.0286884897	-0.005405405	0.04860368	2.415057e-01	3.622586e-01				FALSE
Fezf1	0.0265212046	-0.005405405	0.04728014	2.497538e-01	3.680582e-01				FALSE
Fst	0.0035186975	-0.005405405	0.04982596	4.289274e-01	5.719033e-01				FALSE
Gabra1	-0.0423245753	-0.005405405	0.04924164	7.732989e-01	8.417030e-01				FALSE
Galr1	0.0087277285	-0.005405405	0.04947195	3.875617e-01	5.289660e-01				FALSE
Gbx2	0.0233479239	-0.005405405	0.04878525	2.778013e-01	3.988941e-01				FALSE
Gda	0.0272005869	-0.005405405	0.04924348	2.539413e-01	3.681180e-01				FALSE
Gjc3	-0.0550301406	-0.005405405	0.04890067	8.449010e-01	8.793910e-01				FALSE
Glra3	0.0284350569	-0.005405405	0.04935213	2.464530e-01	3.664080e-01				FALSE
Grpr	0.0018800824	-0.005405405	0.04992483	4.419887e-01	5.846779e-01				FALSE
Htr2c	-0.0571223154	-0.005405405	0.04818067	8.584531e-01	8.793910e-01				FALSE
Igf2r	0.0716036642	-0.005405405	0.05004330	6.192061e-02	1.223843e-01				FALSE
Isl1	-0.0002821144	-0.005405405	0.04867914	4.580903e-01	5.963444e-01				FALSE
Kiss1r	-0.0101239912	-0.005405405	0.04949532	5.379752e-01	6.597068e-01				FALSE
Mc4r	0.0607968301	-0.005405405	0.04941862	9.018425e-02	1.683439e-01				FALSE
Mki67	-0.0363655796	-0.005405405	0.04921556	7.353493e-01	8.181370e-01				FALSE
Ndnf	0.0921245673	-0.005405405	0.04979908	2.508748e-02	5.403458e-02				FALSE
Ndrg1	0.0760192766	-0.005405405	0.05004787	5.187534e-02	1.075933e-01				FALSE
Npas1	-0.0413200565	-0.005405405	0.04819424	7.719265e-01	8.417030e-01				FALSE
Npy2r	0.0336840664	-0.005405405	0.04994803	2.169302e-01	3.379779e-01				FALSE
Ntng1	-0.0027229269	-0.005405405	0.04535400	4.764182e-01	6.109790e-01				FALSE
Ntsr1	0.0401595025	-0.005405405	0.04858139	1.741456e-01	2.840434e-01				FALSE
Nup62cl	-0.0056800444	-0.005405405	0.04820250	5.022730e-01	6.297154e-01				FALSE
Onecut2	-0.0047869775	-0.005405405	0.04968264	4.950343e-01	6.266895e-01				FALSE
Oprd1	-0.0308828561	-0.005405405	0.04915074	6.978941e-01	7.944919e-01				FALSE
Oprk1	-0.0567039736	-0.005405405	0.04656283	8.647053e-01	8.804273e-01				FALSE
Oprl1	0.0517790726	-0.005405405	0.04976107	1.252407e-01	2.169116e-01				FALSE
Oxtr	-0.0006460213	-0.005405405	0.04918560	4.614570e-01	5.963444e-01				FALSE
Pcdh11x	-0.0109214898	-0.005405405	0.04967472	5.442093e-01	6.625157e-01				FALSE
Pgr	-0.0204497558	-0.005405405	0.04885205	6.209426e-01	7.398465e-01				FALSE
Pnoc	-0.0636905755	-0.005405405	0.04989667	8.786203e-01	8.842386e-01				FALSE
Prlr	0.0207264270	-0.005405405	0.04907473	2.971931e-01	4.202513e-01				FALSE
Ramp3	0.0045010598	-0.005405405	0.04850958	4.190921e-01	5.632598e-01				FALSE
Rgs2	0.0298397519	-0.005405405	0.04934606	2.375379e-01	3.595169e-01				FALSE
Rxfp1	0.0531626620	-0.005405405	0.04819839	1.121553e-01	1.962717e-01				FALSE
Scgn	-0.0564830315	-0.005405405	0.04895340	8.516168e-01	8.793910e-01				FALSE
Selplg	0.0737124595	-0.005405405	0.04960194	5.534988e-02	1.133998e-01				FALSE
Sema3c	0.0592657866	-0.005405405	0.04938281	9.516745e-02	1.737840e-01				FALSE
Sema4d	0.0674083581	-0.005405405	0.04980698	7.188173e-02	1.404201e-01				FALSE
Serpinb1b	-0.0768289383	-0.005405405	0.04835045	9.301897e-01	9.301897e-01				FALSE
Slc15a3	0.0482229933	-0.005405405	0.04980886	1.408107e-01	2.413899e-01				FALSE
Slc17a6	0.0084859089	-0.005405405	0.04993185	3.904273e-01	5.289660e-01				FALSE
Slc17a7	-0.0146961382	-0.005405405	0.04792763	5.768530e-01	6.972036e-01				FALSE
Slc17a8	0.0402509509	-0.005405405	0.04760562	1.687658e-01	2.835265e-01				FALSE
Synpr	-0.0576308975	-0.005405405	0.04892615	8.571123e-01	8.793910e-01				FALSE
Syt2	-0.0312279553	-0.005405405	0.04947095	6.991558e-01	7.944919e-01				FALSE
Syt4	-0.0049303619	-0.005405405	0.04895971	4.961292e-01	6.266895e-01				FALSE
Sytl4	0.0324932374	-0.005405405	0.04990443	2.237994e-01	3.418027e-01				FALSE
Tacr1	-0.0174624576	-0.005405405	0.04912408	5.969424e-01	7.163309e-01				FALSE
Tacr3	0.0798719808	-0.005405405	0.04973674	4.321155e-02	9.189291e-02				FALSE
Traf4	0.0126181659	-0.005405405	0.05003283	3.593357e-01	4.948230e-01				FALSE
Trhr	-0.0466793684	-0.005405405	0.04912596	7.995923e-01	8.556147e-01				FALSE
Ttn	0.0268304020	-0.005405405	0.04873848	2.541767e-01	3.681180e-01				FALSE
Blank-1	0.0334916814	-0.005405405	0.04977608	2.172715e-01	3.379779e-01				FALSE
Blank-2	-0.0619587889	-0.005405405	0.04834120	8.789753e-01	8.842386e-01				FALSE
Blank-3	-0.0303219563	-0.005405405	0.04753794	6.999095e-01	7.944919e-01				FALSE
Blank-4	-0.0561208177	-0.005405405	0.04766309	8.563446e-01	8.793910e-01				FALSE
Blank-5	0.0180121871	-0.005405405	0.04965779	3.186135e-01	4.446198e-01				FALSE
Nts	0.0332308495	-0.005405405	0.02792295	8.322916e-02	1.588920e-01				FALSE
Vip	-0.0180161704	-0.005405405	0.01236421	8.461217e-01	8.793910e-01				FALSE

## Sheet: mPOA_Endothelial_Rgs5-FN7_3
gene	observed	expected	sd	p.value	p.adj	minPercentCells	X10.	X90.	FINAL
Cyp19a1	0.1786938185	-0.009259259	0.065796937	2.141277e-03	4.496681e-02	0.06422018	0.0000000	0.00000000	FALSE
Ermn	0.3440166561	-0.009259259	0.070394954	2.604048e-07	2.187401e-05	0.11009174	0.0000000	0.62407800	FALSE
Isl1	0.1867180495	-0.009259259	0.064698740	1.226520e-03	4.121109e-02	0.05504587	0.0000000	0.00000000	FALSE
Syt2	0.1882132353	-0.009259259	0.068933646	2.087187e-03	4.496681e-02	0.10091743	0.0000000	0.30366800	FALSE
Tac2	0.1925433992	-0.009259259	0.067874186	1.473623e-03	4.126145e-02	0.11009174	-0.0113528	0.00668946	FALSE
Nnat	0.2744757227	-0.009259259	0.070259486	2.691003e-05	1.130221e-03	0.16513761	-0.0628502	0.01840860	FALSE
Sln	0.2977885628	-0.009259259	0.070705113	7.038596e-06	3.941614e-04	0.14678899	-0.2701460	0.30592000	TRUE
Mbp	0.5922593200	-0.009259259	0.069575749	0.000000e+00	0.000000e+00	0.15596330	-0.2194100	0.12905800	FALSE
4732456N10Rik	-0.0779285330	-0.009259259	0.067839695	8.442856e-01	8.880790e-01				FALSE
Ace2	0.0877154107	-0.009259259	0.070842241	8.551808e-02	4.634528e-01				FALSE
Adora2a	-0.0805342113	-0.009259259	0.070642647	8.435009e-01	8.880790e-01				FALSE
Aldh1l1	-0.0599996126	-0.009259259	0.070606166	7.638183e-01	8.880790e-01				FALSE
Amigo2	-0.0021880065	-0.009259259	0.070261898	4.599176e-01	8.585128e-01				FALSE
Ano3	-0.0369637837	-0.009259259	0.068637258	6.567601e-01	8.719222e-01				FALSE
Aqp4	-0.1070662007	-0.009259259	0.070508113	9.173055e-01	9.283573e-01				FALSE
Ar	0.0279568241	-0.009259259	0.068694799	2.939920e-01	7.641811e-01				FALSE
Arhgap36	0.0821771387	-0.009259259	0.069892182	9.539438e-02	4.713605e-01				FALSE
Avpr1a	0.0959296524	-0.009259259	0.069171311	6.416739e-02	3.891417e-01				FALSE
Avpr2	0.0508286654	-0.009259259	0.069191290	1.925790e-01	6.517814e-01				FALSE
Baiap2	-0.0891487795	-0.009259259	0.070916561	8.700290e-01	9.022523e-01				FALSE
Bdnf	0.0105986721	-0.009259259	0.070204078	3.886420e-01	8.279606e-01				FALSE
Bmp7	-0.0010390614	-0.009259259	0.068859757	4.524888e-01	8.585128e-01				FALSE
Brs3	0.0380164507	-0.009259259	0.065493107	2.351956e-01	7.455258e-01				FALSE
Calcr	-0.0360671185	-0.009259259	0.046386641	7.183416e-01	8.880790e-01				FALSE
Cbln1	-0.0625782251	-0.009259259	0.068434598	7.820464e-01	8.880790e-01				FALSE
Cbln2	0.0979773371	-0.009259259	0.070772436	6.485694e-02	3.891417e-01				FALSE
Cckar	-0.1848485281	-0.009259259	0.070556951	9.935880e-01	9.935880e-01				FALSE
Cckbr	0.0503042508	-0.009259259	0.070133966	1.978622e-01	6.517814e-01				FALSE
Ccnd2	0.0852073382	-0.009259259	0.070537651	9.024684e-02	4.648699e-01				FALSE
Cd24a	0.1333155936	-0.009259259	0.068982812	1.937570e-02	1.713220e-01				FALSE
Cdkn1a	0.0515407951	-0.009259259	0.070676814	1.948244e-01	6.517814e-01				FALSE
Cenpe	-0.0250088094	-0.009259259	0.067419673	5.923540e-01	8.719222e-01				FALSE
Chat	-0.0097612312	-0.009259259	0.069341294	5.028880e-01	8.644597e-01				FALSE
Coch	-0.0667613109	-0.009259259	0.068367236	7.998474e-01	8.880790e-01				FALSE
Col25a1	0.0496743604	-0.009259259	0.068749427	1.956607e-01	6.517814e-01				FALSE
Cplx3	-0.0202690588	-0.009259259	0.068288983	5.640414e-01	8.719222e-01				FALSE
Cpne5	-0.0008687049	-0.009259259	0.069989556	4.522879e-01	8.585128e-01				FALSE
Creb3l1	-0.0710639654	-0.009259259	0.068844932	8.153374e-01	8.880790e-01				FALSE
Crhbp	0.1091141334	-0.009259259	0.058974805	2.236494e-02	1.803495e-01				FALSE
Crhr1	-0.0302782550	-0.009259259	0.066719104	6.236333e-01	8.719222e-01				FALSE
Crhr2	0.1192503806	-0.009259259	0.069242032	3.173046e-02	2.132287e-01				FALSE
Cspg5	0.0071650177	-0.009259259	0.070735350	4.081939e-01	8.279606e-01				FALSE
Cxcl14	-0.0775970931	-0.009259259	0.070574934	8.335532e-01	8.880790e-01				FALSE
Cyp26a1	-0.0344114571	-0.009259259	0.053118277	6.820764e-01	8.737972e-01				FALSE
Cyr61	-0.0842276034	-0.009259259	0.070148316	8.574003e-01	8.946785e-01				FALSE
Dgkk	0.1129706898	-0.009259259	0.069384059	3.906481e-02	2.524188e-01				FALSE
Ebf3	-0.0282066614	-0.009259259	0.059744563	6.244314e-01	8.719222e-01				FALSE
Egr2	0.0638558418	-0.009259259	0.069821568	1.475104e-01	5.900417e-01				FALSE
Esr1	-0.0437053392	-0.009259259	0.068274284	6.930537e-01	8.754363e-01				FALSE
Etv1	0.0255895905	-0.009259259	0.070719031	3.110844e-01	7.800325e-01				FALSE
Fbxw13	-0.0124078958	-0.009259259	0.066411284	5.189072e-01	8.644597e-01				FALSE
Fezf1	-0.0318423147	-0.009259259	0.066034369	6.338206e-01	8.719222e-01				FALSE
Fn1	-0.0135158709	-0.009259259	0.070710852	5.240008e-01	8.644597e-01				FALSE
Fst	0.0050618894	-0.009259259	0.069478157	4.183468e-01	8.279606e-01				FALSE
Gabra1	0.0886787228	-0.009259259	0.069660421	7.987180e-02	4.472821e-01				FALSE
Gabrg1	-0.0268151911	-0.009259259	0.069378866	5.998830e-01	8.719222e-01				FALSE
Gad1	-0.0151224576	-0.009259259	0.070397220	5.331885e-01	8.644597e-01				FALSE
Galr1	0.0186073390	-0.009259259	0.069660228	3.445650e-01	7.870854e-01				FALSE
Galr2	-0.0255419877	-0.009259259	0.070711873	5.910585e-01	8.719222e-01				FALSE
Gbx2	-0.0486348651	-0.009259259	0.068752602	7.165810e-01	8.880790e-01				FALSE
Gda	0.0256377720	-0.009259259	0.067116108	3.015492e-01	7.675797e-01				FALSE
Gem	-0.0761625513	-0.009259259	0.066370812	8.432782e-01	8.880790e-01				FALSE
Gjc3	0.0598220629	-0.009259259	0.069915096	1.615581e-01	6.031502e-01				FALSE
Glra3	0.0585407836	-0.009259259	0.067246135	1.566703e-01	5.981959e-01				FALSE
Gpr165	0.0282940806	-0.009259259	0.069943616	2.956653e-01	7.641811e-01				FALSE
Greb1	-0.0173798314	-0.009259259	0.066304517	5.487381e-01	8.696982e-01				FALSE
Grpr	0.0297799510	-0.009259259	0.068043105	2.830711e-01	7.641811e-01				FALSE
Htr2c	-0.0388011837	-0.009259259	0.067646748	6.688387e-01	8.719222e-01				FALSE
Igf1r	0.0557707279	-0.009259259	0.070375050	1.777304e-01	6.352918e-01				FALSE
Igf2r	0.0290954803	-0.009259259	0.070863960	2.941695e-01	7.641811e-01				FALSE
Irs4	0.0104437584	-0.009259259	0.070519042	3.899689e-01	8.279606e-01				FALSE
Kiss1r	-0.0357715887	-0.009259259	0.069188857	6.492098e-01	8.719222e-01				FALSE
Klf4	-0.0123504595	-0.009259259	0.070727551	5.174305e-01	8.644597e-01				FALSE
Lepr	0.1365645353	-0.009259259	0.069008963	1.729551e-02	1.707293e-01				FALSE
Lmod1	0.1251250489	-0.009259259	0.070019224	2.747643e-02	2.098200e-01				FALSE
Lpar1	0.0338607877	-0.009259259	0.070468076	2.702990e-01	7.641811e-01				FALSE
Man1a	-0.0622586610	-0.009259259	0.070267146	7.746522e-01	8.880790e-01				FALSE
Mc4r	-0.1160623913	-0.009259259	0.069158322	9.387456e-01	9.443668e-01				FALSE
Mki67	0.0044412896	-0.009259259	0.068527423	4.207685e-01	8.279606e-01				FALSE
Mlc1	0.1401467190	-0.009259259	0.070657101	1.723536e-02	1.707293e-01				FALSE
Myh11	0.1319962008	-0.009259259	0.070492442	2.254369e-02	1.803495e-01				FALSE
Ndnf	-0.0341309935	-0.009259259	0.069946895	6.389225e-01	8.719222e-01				FALSE
Ndrg1	0.0798004398	-0.009259259	0.070548713	1.034050e-01	4.963439e-01				FALSE
Necab1	-0.0732545158	-0.009259259	0.067951413	8.268473e-01	8.880790e-01				FALSE
Nos1	0.1369865986	-0.009259259	0.069961809	1.829242e-02	1.707293e-01				FALSE
Npas1	0.0207528184	-0.009259259	0.068155616	3.298431e-01	7.870854e-01				FALSE
Npy1r	-0.0048506876	-0.009259259	0.070805545	4.751767e-01	8.644597e-01				FALSE
Npy2r	-0.0340015931	-0.009259259	0.070701085	6.368145e-01	8.719222e-01				FALSE
Ntng1	-0.0536505497	-0.009259259	0.058765986	7.749928e-01	8.880790e-01				FALSE
Ntsr1	-0.0749205699	-0.009259259	0.065897847	8.404746e-01	8.880790e-01				FALSE
Nup62cl	-0.0390133403	-0.009259259	0.067844149	6.695117e-01	8.719222e-01				FALSE
Omp	0.0765972835	-0.009259259	0.069078908	1.069567e-01	4.991313e-01				FALSE
Onecut2	-0.0193375618	-0.009259259	0.070292811	5.570034e-01	8.719222e-01				FALSE
Opalin	0.1733029702	-0.009259259	0.068312125	3.764735e-03	7.027505e-02				FALSE
Oprd1	0.0186211671	-0.009259259	0.067712819	3.402631e-01	7.870854e-01				FALSE
Oprk1	-0.0647318236	-0.009259259	0.068799389	7.899634e-01	8.880790e-01				FALSE
Oprl1	-0.0402333462	-0.009259259	0.070635755	6.694896e-01	8.719222e-01				FALSE
Oxtr	0.0682274342	-0.009259259	0.065504199	1.184190e-01	5.305316e-01				FALSE
Pak3	0.1693836431	-0.009259259	0.070759989	5.790982e-03	8.844409e-02				FALSE
Pcdh11x	-0.0130478126	-0.009259259	0.070099750	5.215504e-01	8.644597e-01				FALSE
Pdgfra	0.0434208759	-0.009259259	0.068823006	2.220037e-01	7.172427e-01				FALSE
Pgr	-0.0137416032	-0.009259259	0.068021704	5.262696e-01	8.644597e-01				FALSE
Plin3	0.1231991072	-0.009259259	0.070734450	3.056081e-02	2.132287e-01				FALSE
Pnoc	-0.0331256879	-0.009259259	0.069577734	6.342076e-01	8.719222e-01				FALSE
Pou3f2	0.0163766739	-0.009259259	0.069968227	3.570356e-01	7.997597e-01				FALSE
Prlr	-0.0690049504	-0.009259259	0.068866231	8.071828e-01	8.880790e-01				FALSE
Ramp3	-0.0100980804	-0.009259259	0.066257192	5.050505e-01	8.644597e-01				FALSE
Rgs2	0.0387054856	-0.009259259	0.068940026	2.432940e-01	7.569146e-01				FALSE
Rgs5	-0.0760106825	-0.009259259	0.065536309	8.457896e-01	8.880790e-01				FALSE
Rnd3	-0.0171998470	-0.009259259	0.070829767	5.446311e-01	8.696982e-01				FALSE
Rxfp1	0.0033407353	-0.009259259	0.062830505	4.205294e-01	8.279606e-01				FALSE
Scgn	-0.0411802118	-0.009259259	0.065666299	6.865549e-01	8.737972e-01				FALSE
Selplg	-0.0317448090	-0.009259259	0.069325666	6.271622e-01	8.719222e-01				FALSE
Sema3c	0.0698417229	-0.009259259	0.070866268	1.321681e-01	5.551060e-01				FALSE
Sema4d	-0.0566084858	-0.009259259	0.070058383	7.504333e-01	8.880790e-01				FALSE
Serpinb1b	0.1537509259	-0.009259259	0.064290165	5.613730e-03	8.844409e-02				FALSE
Serpine1	-0.0517475562	-0.009259259	0.062924458	7.502342e-01	8.880790e-01				FALSE
Sgk1	-0.0276261899	-0.009259259	0.070609886	6.026138e-01	8.719222e-01				FALSE
Slc15a3	-0.0900823435	-0.009259259	0.069422295	8.778333e-01	9.047607e-01				FALSE
Slc17a6	0.0221778571	-0.009259259	0.070727824	3.283477e-01	7.870854e-01				FALSE
Slc17a7	-0.0267625140	-0.009259259	0.056176697	6.223182e-01	8.719222e-01				FALSE
Slc17a8	0.0037515459	-0.009259259	0.067733857	4.238370e-01	8.279606e-01				FALSE
Slc18a2	0.0168709370	-0.009259259	0.066275581	3.466924e-01	7.870854e-01				FALSE
Slco1a4	-0.0155038561	-0.009259259	0.070799264	5.351417e-01	8.644597e-01				FALSE
Sox4	-0.0765058550	-0.009259259	0.070824212	8.288132e-01	8.880790e-01				FALSE
Sox6	0.1597610712	-0.009259259	0.070288697	8.093787e-03	1.045966e-01				FALSE
Sox8	-0.0693002305	-0.009259259	0.070189274	8.038393e-01	8.880790e-01				FALSE
Sp9	0.0272229111	-0.009259259	0.067418679	2.942095e-01	7.641811e-01				FALSE
Synpr	-0.0491989310	-0.009259259	0.068118197	7.211728e-01	8.880790e-01				FALSE
Syt4	0.0357440128	-0.009259259	0.069775458	2.594724e-01	7.641811e-01				FALSE
Sytl4	-0.0995223155	-0.009259259	0.069956090	9.015236e-01	9.192792e-01				FALSE
Tacr1	-0.0350307576	-0.009259259	0.066653685	6.504915e-01	8.719222e-01				FALSE
Tacr3	0.0118603876	-0.009259259	0.070263547	3.818683e-01	8.279606e-01				FALSE
Tiparp	0.1571127095	-0.009259259	0.070601657	9.224328e-03	1.065563e-01				FALSE
Tmem108	0.0073933746	-0.009259259	0.070536948	4.066838e-01	8.279606e-01				FALSE
Traf4	-0.0666219831	-0.009259259	0.070296404	7.927534e-01	8.880790e-01				FALSE
Trhr	-0.0733486098	-0.009259259	0.066629440	8.319444e-01	8.880790e-01				FALSE
Ttn	-0.0112399565	-0.009259259	0.065399013	5.120807e-01	8.644597e-01				FALSE
Ttyh2	0.0577688907	-0.009259259	0.070881726	1.721677e-01	6.287865e-01				FALSE
Blank-1	-0.0079070166	-0.009259259	0.069292410	4.922151e-01	8.644597e-01				FALSE
Blank-2	-0.0310279688	-0.009259259	0.054181703	6.560742e-01	8.719222e-01				FALSE
Blank-3	-0.0105486327	-0.009259259	0.004086617	6.238132e-01	8.719222e-01				FALSE
Blank-4	-0.0521760145	-0.009259259	0.067050316	7.389358e-01	8.880790e-01				FALSE
Blank-5	-0.0081537950	-0.009259259	0.069803894	4.936823e-01	8.644597e-01				FALSE
Oxt	0.0714359562	-0.009259259	0.069604538	1.231591e-01	5.305316e-01				FALSE
Penk	0.0757407990	-0.009259259	0.063779928	9.131373e-02	4.648699e-01				FALSE
Sst	-0.0753080087	-0.009259259	0.069414582	8.293275e-01	8.880790e-01				FALSE
Tac1	-0.0394465916	-0.009259259	0.064489035	6.801435e-01	8.737972e-01				FALSE
Gal	0.0826995075	-0.009259259	0.065006678	7.859218e-02	4.472821e-01				FALSE
Cartpt	0.0585241088	-0.009259259	0.066840118	1.552646e-01	5.981959e-01				FALSE
Npas4	-0.0994952086	-0.009259259	0.069516975	9.028635e-01	9.192792e-01				FALSE
Vgf	0.0574328187	-0.009259259	0.056803225	1.201796e-01	5.305316e-01				FALSE
Trh	-0.0652895378	-0.009259259	0.070462471	7.867453e-01	8.880790e-01				FALSE
Nts	0.0021680551	-0.009259259	0.055962864	4.191007e-01	8.279606e-01				FALSE
Scg2	0.0200757507	-0.009259259	0.067634549	3.322429e-01	7.870854e-01				FALSE
Avp	0.0312835328	-0.009259259	0.070137561	2.816163e-01	7.641811e-01				FALSE
Gnrh1	-0.0217062519	-0.009259259	0.069421657	5.711472e-01	8.719222e-01				FALSE
Vip	0.0312543596	-0.009259259	0.065116963	2.669161e-01	7.641811e-01				FALSE
Egr1	0.0164017007	-0.009259259	0.065009296	3.465220e-01	7.870854e-01				FALSE
Cck	0.1640243465	-0.009259259	0.069942192	6.614837e-03	9.260771e-02				FALSE
Crh	0.0331104339	-0.009259259	0.064914879	2.569761e-01	7.641811e-01				FALSE
Ucn3	0.1223441994	-0.009259259	0.070281013	3.056651e-02	2.132287e-01				FALSE
Adcyap1	0.1482426685	-0.009259259	0.067165467	9.513954e-03	1.065563e-01				FALSE
Arpp21	0.0071092615	-0.009259259	0.067141124	4.036957e-01	8.279606e-01				FALSE
Fos	0.0357513361	-0.009259259	0.068842756	2.566147e-01	7.641811e-01				FALSE
Th	-0.0120327334	-0.009259259	0.068157137	5.162294e-01	8.644597e-01				FALSE
polyT	-0.0022946362	-0.009259259	0.069176870	4.599028e-01	8.585128e-01				FALSE
DAPI	0.0658769857	-0.009259259	0.069144443	1.385944e-01	5.678989e-01				FALSE

## Sheet: mPOA_Endothelial-FN7_3
gene	observed	expected	sd	p.value	p.adj	minPercentCells	X10.	X90.	FINAL
Bmp7	1.209754e-01	-0.004255319	0.04030661	9.451331e-04	6.615932e-03	0.05508475	0.00000000	0.434860000	FALSE
Cbln2	9.327908e-02	-0.004255319	0.04057562	8.113523e-03	4.532970e-02	0.06355932	0.00000000	0.695255000	FALSE
Ccnd2	1.374308e-01	-0.004255319	0.04057137	2.394672e-04	1.828659e-03	0.07627119	0.00000000	0.734740000	FALSE
Ermn	3.195326e-01	-0.004255319	0.04043849	5.551115e-16	1.865175e-14	0.06355932	0.00000000	0.570785000	FALSE
Esr1	9.148928e-02	-0.004255319	0.03934577	7.478562e-03	4.487137e-02	0.04661017	0.00000000	0.166635000	FALSE
Igf1r	2.846203e-01	-0.004255319	0.04031132	3.858025e-13	9.259260e-12	0.08898305	0.99965500	1.658350000	FALSE
Mlc1	1.642509e-01	-0.004255319	0.04061674	1.671914e-05	1.583951e-04	0.08898305	0.00000000	1.247300000	FALSE
Pak3	9.712573e-02	-0.004255319	0.04068078	6.349306e-03	3.950680e-02	0.08474576	0.00000000	0.931155000	FALSE
Rnd3	9.216834e-02	-0.004255319	0.04030054	8.364409e-03	4.532970e-02	0.05508475	0.00000000	0.431635000	FALSE
Sema3c	1.759302e-01	-0.004255319	0.04061881	4.582029e-06	5.131872e-05	0.13135593	0.23254500	1.263150000	FALSE
Serpine1	9.094674e-02	-0.004255319	0.03968389	8.219728e-03	4.532970e-02	0.03813559	0.00000000	0.068500000	FALSE
Slco1a4	2.531927e-01	-0.004255319	0.04012026	6.953504e-11	1.297987e-09	0.05932203	1.26375000	1.997000000	FALSE
Sytl4	9.900395e-02	-0.004255319	0.04034282	5.240460e-03	3.386143e-02	0.06779661	0.00000000	0.442325000	FALSE
Penk	1.162271e-01	-0.004255319	0.03651043	4.835204e-04	3.531801e-03	0.04661017	-0.02149650	0.007711050	FALSE
Sst	1.164949e-01	-0.004255319	0.03930984	1.064022e-03	7.150229e-03	0.04661017	-0.01235450	0.004125700	FALSE
Gal	2.422835e-01	-0.004255319	0.03994330	3.366875e-10	5.142136e-09	0.10169492	-0.01034050	0.005510450	FALSE
Cartpt	1.618062e-01	-0.004255319	0.04017887	1.789851e-05	1.583951e-04	0.07203390	-0.01982800	-0.001792100	FALSE
Trh	1.974463e-01	-0.004255319	0.04010269	2.457160e-07	3.175407e-06	0.08898305	-0.01212000	0.013341000	FALSE
Nts	3.479340e-01	-0.004255319	0.03746520	0.000000e+00	0.000000e+00	0.05508475	-0.01163700	0.001597450	FALSE
Vip	2.555086e-01	-0.004255319	0.03898517	1.340128e-11	2.814269e-10	0.08474576	-0.01236700	0.011783000	FALSE
Tac2	1.220286e-01	-0.004255319	0.02322737	2.711375e-08	3.795925e-07	0.06779661	-0.01236200	0.008496850	FALSE
Cck	1.444421e-01	-0.004255319	0.03971558	9.053622e-05	7.242898e-04	0.08050847	0.00037744	0.019187000	FALSE
Crh	1.680680e-01	-0.004255319	0.04008475	8.579501e-06	9.008476e-05	0.07203390	-0.01210950	0.007767350	FALSE
Ucn3	1.618125e-01	-0.004255319	0.04018227	1.791373e-05	1.583951e-04	0.08474576	-0.00554670	0.006897650	FALSE
Adcyap1	1.938610e-01	-0.004255319	0.04003694	3.742503e-07	4.491004e-06	0.13559322	-0.00988740	0.014364500	FALSE
Nnat	4.290521e-01	-0.004255319	0.03959738	0.000000e+00	0.000000e+00	0.11016949	-0.05946500	0.020664000	FALSE
Sln	3.866582e-01	-0.004255319	0.04065485	0.000000e+00	0.000000e+00	0.20762712	-0.26250000	0.327365000	TRUE
Mbp	5.504882e-01	-0.004255319	0.04024630	0.000000e+00	0.000000e+00	0.14406780	-0.24427500	0.004146000	FALSE
Arpp21	2.493987e-01	-0.004255319	0.04010242	1.264892e-10	2.125018e-09	0.11016949	-0.03942900	0.007100200	FALSE
Fos	1.499742e-01	-0.004255319	0.04030898	6.507302e-05	5.466134e-04	0.08898305	-0.06115200	-0.001368485	FALSE
Th	2.892960e-01	-0.004255319	0.03881478	1.976197e-14	5.533352e-13	0.08474576	-0.03488050	0.054403000	FALSE
4732456N10Rik	4.812293e-02	-0.004255319	0.03896378	8.942883e-02	2.423233e-01				FALSE
Ace2	3.027575e-03	-0.004255319	0.03999947	4.277620e-01	6.994005e-01				FALSE
Adora2a	-1.372844e-02	-0.004255319	0.04016875	5.932189e-01	7.865016e-01				FALSE
Aldh1l1	6.986184e-02	-0.004255319	0.04059753	3.395096e-02	1.244265e-01				FALSE
Amigo2	-3.923707e-02	-0.004255319	0.04053094	8.059553e-01	8.907927e-01				FALSE
Ano3	-6.058432e-02	-0.004255319	0.03954327	9.228477e-01	9.453562e-01				FALSE
Aqp4	8.881007e-02	-0.004255319	0.04062997	1.099444e-02	5.432547e-02				FALSE
Ar	-3.844695e-03	-0.004255319	0.04038144	4.959434e-01	7.308639e-01				FALSE
Arhgap36	-5.575896e-02	-0.004255319	0.03996302	9.012631e-01	9.404485e-01				FALSE
Avpr1a	1.705377e-03	-0.004255319	0.04035585	4.412884e-01	6.994005e-01				FALSE
Avpr2	-8.490843e-03	-0.004255319	0.03757040	5.448799e-01	7.674632e-01				FALSE
Baiap2	1.921851e-02	-0.004255319	0.04069294	2.820196e-01	5.323515e-01				FALSE
Bdnf	-1.299879e-02	-0.004255319	0.03933254	5.879583e-01	7.865016e-01				FALSE
Brs3	1.970415e-02	-0.004255319	0.03842330	2.664563e-01	5.145362e-01				FALSE
Calcr	-3.259558e-02	-0.004255319	0.03858152	7.686949e-01	8.609382e-01				FALSE
Cbln1	6.103232e-02	-0.004255319	0.03962621	4.971869e-02	1.632737e-01				FALSE
Cckar	-2.533739e-03	-0.004255319	0.04040825	4.830083e-01	7.308639e-01				FALSE
Cckbr	-2.171687e-02	-0.004255319	0.03973711	6.698238e-01	8.225617e-01				FALSE
Cd24a	5.401580e-02	-0.004255319	0.04014176	7.330178e-02	2.153913e-01				FALSE
Cdkn1a	-7.811194e-02	-0.004255319	0.04069341	9.652344e-01	9.710143e-01				FALSE
Cenpe	-7.858238e-05	-0.004255319	0.04029571	4.587227e-01	7.174150e-01				FALSE
Chat	7.146769e-02	-0.004255319	0.03959959	2.792418e-02	1.090991e-01				FALSE
Coch	-5.708662e-03	-0.004255319	0.03938718	5.147172e-01	7.466771e-01				FALSE
Col25a1	-8.648056e-02	-0.004255319	0.04004734	9.799735e-01	9.799735e-01				FALSE
Cplx3	-2.092737e-02	-0.004255319	0.03928808	6.643461e-01	8.225617e-01				FALSE
Cpne5	-5.784758e-02	-0.004255319	0.04028875	9.082745e-01	9.419143e-01				FALSE
Creb3l1	2.606928e-02	-0.004255319	0.04044786	2.267115e-01	4.644821e-01				FALSE
Crhbp	2.645867e-02	-0.004255319	0.03834565	2.115725e-01	4.388169e-01				FALSE
Crhr1	-4.257647e-02	-0.004255319	0.03944880	8.343291e-01	9.101772e-01				FALSE
Crhr2	1.999124e-02	-0.004255319	0.04030552	2.737305e-01	5.225764e-01				FALSE
Cspg5	7.815423e-02	-0.004255319	0.04067296	2.137468e-02	9.449857e-02				FALSE
Cxcl14	7.735371e-02	-0.004255319	0.04065246	2.234925e-02	9.627369e-02				FALSE
Cyp19a1	-1.399721e-02	-0.004255319	0.03463944	6.107356e-01	7.892584e-01				FALSE
Cyp26a1	-2.379019e-02	-0.004255319	0.03848431	6.941352e-01	8.292586e-01				FALSE
Cyr61	1.503075e-02	-0.004255319	0.04029363	3.160980e-01	5.900496e-01				FALSE
Dgkk	5.573620e-02	-0.004255319	0.04055942	6.955654e-02	2.124636e-01				FALSE
Ebf3	-1.375653e-02	-0.004255319	0.03907268	5.960623e-01	7.865016e-01				FALSE
Egr2	-2.158098e-02	-0.004255319	0.03919243	6.707795e-01	8.225617e-01				FALSE
Etv1	3.557024e-02	-0.004255319	0.04056310	1.630949e-01	3.753416e-01				FALSE
Fbxw13	3.099691e-03	-0.004255319	0.03688792	4.209796e-01	6.994005e-01				FALSE
Fezf1	-2.598654e-03	-0.004255319	0.03917066	4.831324e-01	7.308639e-01				FALSE
Fn1	-1.320955e-02	-0.004255319	0.04036766	5.877719e-01	7.865016e-01				FALSE
Fst	5.087875e-02	-0.004255319	0.04026101	8.543467e-02	2.352955e-01				FALSE
Gabra1	5.151294e-02	-0.004255319	0.04024056	8.289301e-02	2.321004e-01				FALSE
Gabrg1	-2.488567e-02	-0.004255319	0.04028098	6.957309e-01	8.292586e-01				FALSE
Gad1	9.005154e-02	-0.004255319	0.04059629	1.008847e-02	5.228717e-02				FALSE
Galr1	-2.613560e-02	-0.004255319	0.03980924	7.087128e-01	8.292586e-01				FALSE
Galr2	3.214966e-02	-0.004255319	0.04060444	1.849725e-01	4.035764e-01				FALSE
Gbx2	7.739855e-02	-0.004255319	0.03999648	2.059927e-02	9.449857e-02				FALSE
Gda	-5.505255e-02	-0.004255319	0.03994884	8.982347e-01	9.404485e-01				FALSE
Gem	-1.469107e-02	-0.004255319	0.03944576	6.043256e-01	7.870287e-01				FALSE
Gjc3	2.475079e-02	-0.004255319	0.04041697	2.364799e-01	4.786582e-01				FALSE
Glra3	1.779842e-03	-0.004255319	0.04017705	4.402978e-01	6.994005e-01				FALSE
Gpr165	5.910071e-02	-0.004255319	0.04055270	5.910709e-02	1.838887e-01				FALSE
Greb1	2.044967e-03	-0.004255319	0.03884588	4.355794e-01	6.994005e-01				FALSE
Grpr	-4.075957e-02	-0.004255319	0.03862109	8.277190e-01	9.088679e-01				FALSE
Htr2c	5.313982e-02	-0.004255319	0.03974572	7.436127e-02	2.153913e-01				FALSE
Igf2r	-4.702621e-02	-0.004255319	0.04031378	8.556436e-01	9.238130e-01				FALSE
Irs4	3.400332e-02	-0.004255319	0.04045112	1.721255e-01	3.855237e-01				FALSE
Isl1	3.517316e-02	-0.004255319	0.03831196	1.517063e-01	3.589670e-01				FALSE
Kiss1r	-9.516443e-03	-0.004255319	0.03953675	5.529307e-01	7.677054e-01				FALSE
Klf4	-3.315613e-03	-0.004255319	0.04069786	4.907893e-01	7.308639e-01				FALSE
Lepr	3.019249e-02	-0.004255319	0.04031154	1.964031e-01	4.124464e-01				FALSE
Lmod1	7.272644e-02	-0.004255319	0.03927551	2.499526e-02	1.022012e-01				FALSE
Lpar1	3.150256e-02	-0.004255319	0.04046374	1.884286e-01	4.058463e-01				FALSE
Man1a	-2.995521e-04	-0.004255319	0.04060413	4.611953e-01	7.174150e-01				FALSE
Mc4r	3.930109e-02	-0.004255319	0.03948915	1.350143e-01	3.240342e-01				FALSE
Mki67	-8.372289e-03	-0.004255319	0.04008304	5.409038e-01	7.674632e-01				FALSE
Myh11	-2.795891e-02	-0.004255319	0.03972873	7.246248e-01	8.395653e-01				FALSE
Ndnf	3.388796e-02	-0.004255319	0.04071198	1.744036e-01	3.855237e-01				FALSE
Ndrg1	7.760562e-02	-0.004255319	0.04039063	2.134496e-02	9.449857e-02				FALSE
Necab1	-3.648262e-03	-0.004255319	0.03962543	4.938885e-01	7.308639e-01				FALSE
Nos1	7.516533e-02	-0.004255319	0.04044609	2.478724e-02	1.022012e-01				FALSE
Npas1	-5.255903e-02	-0.004255319	0.03986649	8.871743e-01	9.404485e-01				FALSE
Npy1r	5.548123e-03	-0.004255319	0.04045621	4.042652e-01	6.977217e-01				FALSE
Npy2r	-2.469031e-02	-0.004255319	0.04037749	6.936063e-01	8.292586e-01				FALSE
Ntng1	2.181075e-02	-0.004255319	0.03884228	2.510865e-01	4.911853e-01				FALSE
Ntsr1	4.448909e-02	-0.004255319	0.03935300	1.077384e-01	2.701501e-01				FALSE
Nup62cl	-5.784518e-03	-0.004255319	0.03919017	5.155628e-01	7.466771e-01				FALSE
Omp	8.838121e-02	-0.004255319	0.03999316	1.027069e-02	5.228717e-02				FALSE
Onecut2	-1.655036e-02	-0.004255319	0.04036111	6.196745e-01	7.946970e-01				FALSE
Opalin	-3.116204e-02	-0.004255319	0.03999216	7.494627e-01	8.565288e-01				FALSE
Oprd1	-1.557317e-03	-0.004255319	0.03973933	4.729356e-01	7.289283e-01				FALSE
Oprk1	-3.271634e-02	-0.004255319	0.03987054	7.623356e-01	8.595462e-01				FALSE
Oprl1	-4.861350e-02	-0.004255319	0.04049565	8.633252e-01	9.238130e-01				FALSE
Oxtr	3.365431e-03	-0.004255319	0.03965981	4.238112e-01	6.994005e-01				FALSE
Pcdh11x	6.509134e-02	-0.004255319	0.04034461	4.282012e-02	1.498704e-01				FALSE
Pdgfra	6.316524e-02	-0.004255319	0.04024325	4.693514e-02	1.577021e-01				FALSE
Pgr	7.365716e-02	-0.004255319	0.03994213	2.555030e-02	1.022012e-01				FALSE
Plin3	6.947501e-02	-0.004255319	0.04063670	3.480979e-02	1.244265e-01				FALSE
Pnoc	-1.836211e-02	-0.004255319	0.04034025	6.367162e-01	8.015951e-01				FALSE
Pou3f2	6.167309e-02	-0.004255319	0.04020839	5.053711e-02	1.632737e-01				FALSE
Prlr	6.800101e-02	-0.004255319	0.03975696	3.457406e-02	1.244265e-01				FALSE
Ramp3	-3.237182e-02	-0.004255319	0.03983878	7.598304e-01	8.595462e-01				FALSE
Rgs2	4.605047e-02	-0.004255319	0.03986671	1.035014e-01	2.634582e-01				FALSE
Rgs5	7.030910e-02	-0.004255319	0.04060816	3.316456e-02	1.244265e-01				FALSE
Rxfp1	9.324050e-03	-0.004255319	0.03973695	3.662765e-01	6.616607e-01				FALSE
Scgn	-2.955873e-02	-0.004255319	0.03948225	7.391999e-01	8.505861e-01				FALSE
Selplg	1.250326e-02	-0.004255319	0.03980352	3.368656e-01	6.219058e-01				FALSE
Sema4d	-9.081082e-03	-0.004255319	0.04037844	5.475657e-01	7.674632e-01				FALSE
Serpinb1b	3.965193e-02	-0.004255319	0.03928022	1.318272e-01	3.209706e-01				FALSE
Sgk1	-6.028072e-02	-0.004255319	0.04068558	9.157490e-01	9.438395e-01				FALSE
Slc15a3	-4.725596e-02	-0.004255319	0.04013617	8.579982e-01	9.238130e-01				FALSE
Slc17a6	1.820583e-03	-0.004255319	0.04054127	4.404338e-01	6.994005e-01				FALSE
Slc17a7	8.493581e-03	-0.004255319	0.03951254	3.734785e-01	6.674934e-01				FALSE
Slc17a8	-1.389622e-02	-0.004255319	0.03835208	5.992393e-01	7.865016e-01				FALSE
Slc18a2	7.770510e-03	-0.004255319	0.03914712	3.793472e-01	6.708456e-01				FALSE
Sox4	7.505600e-03	-0.004255319	0.04069746	3.862968e-01	6.760193e-01				FALSE
Sox6	4.874739e-02	-0.004255319	0.04030470	9.424648e-02	2.473970e-01				FALSE
Sox8	5.336505e-02	-0.004255319	0.04053446	7.758344e-02	2.209155e-01				FALSE
Sp9	-6.380273e-02	-0.004255319	0.03932826	9.350014e-01	9.520014e-01				FALSE
Synpr	-2.536042e-02	-0.004255319	0.03990316	7.015654e-01	8.292586e-01				FALSE
Syt2	-5.316937e-02	-0.004255319	0.03975920	8.906996e-01	9.404485e-01				FALSE
Syt4	-1.865582e-02	-0.004255319	0.04036368	6.393675e-01	8.015951e-01				FALSE
Tacr1	2.248129e-02	-0.004255319	0.03990748	2.514401e-01	4.911853e-01				FALSE
Tacr3	1.219007e-02	-0.004255319	0.04038404	3.419214e-01	6.243781e-01				FALSE
Tiparp	-7.655671e-02	-0.004255319	0.04041577	9.631878e-01	9.710143e-01				FALSE
Tmem108	3.087460e-02	-0.004255319	0.04055818	1.932009e-01	4.108576e-01				FALSE
Traf4	6.057343e-02	-0.004255319	0.03989924	5.210136e-02	1.651515e-01				FALSE
Trhr	-1.680058e-02	-0.004255319	0.03838217	6.281098e-01	7.994125e-01				FALSE
Ttn	4.877786e-03	-0.004255319	0.03882168	4.070043e-01	6.977217e-01				FALSE
Ttyh2	4.849761e-02	-0.004255319	0.04071889	9.756713e-02	2.521735e-01				FALSE
Blank-1	-1.199941e-02	-0.004255319	0.04007703	5.766106e-01	7.865016e-01				FALSE
Blank-2	-2.359020e-02	-0.004255319	0.03593842	7.047116e-01	8.292586e-01				FALSE
Blank-3	-2.256519e-02	-0.004255319	0.03294902	7.107930e-01	8.292586e-01				FALSE
Blank-4	-3.675032e-02	-0.004255319	0.03788186	8.044981e-01	8.907927e-01				FALSE
Blank-5	-9.100416e-03	-0.004255319	0.04001415	5.481880e-01	7.674632e-01				FALSE
Oxt	8.673840e-02	-0.004255319	0.04010180	1.163210e-02	5.583407e-02				FALSE
Tac1	1.942719e-02	-0.004255319	0.03398350	2.429381e-01	4.858763e-01				FALSE
Npas4	-9.876160e-03	-0.004255319	0.03322027	5.671800e-01	7.810347e-01				FALSE
Vgf	4.903159e-02	-0.004255319	0.03647799	7.203566e-02	2.153913e-01				FALSE
Scg2	4.359000e-02	-0.004255319	0.04007582	1.162644e-01	2.872415e-01				FALSE
Avp	6.371154e-02	-0.004255319	0.04015099	4.524851e-02	1.551377e-01				FALSE
Gnrh1	3.216726e-02	-0.004255319	0.03826783	1.706041e-01	3.855237e-01				FALSE
Egr1	1.496847e-03	-0.004255319	0.03510608	4.349242e-01	6.994005e-01				FALSE
polyT	3.580164e-02	-0.004255319	0.04014752	1.592017e-01	3.714706e-01				FALSE
DAPI	4.760761e-02	-0.004255319	0.03937815	9.391120e-02	2.473970e-01				FALSE

## Sheet: mPOA_Ependymal-FN7_9
gene	observed	expected	sd	p.value	p.adj	minPercentCells	X10.	X90.	FINAL
Aldh1l1	0.0813588829	-0.003663004	0.03614367	9.328075e-03	2.749327e-02	0.08394161	0.00000000	0.898687000	FALSE
Aqp4	0.1846617484	-0.003663004	0.03574714	6.886639e-08	3.732114e-07	0.06934307	0.87568700	1.453250000	TRUE
Ar	0.0990785648	-0.003663004	0.03580067	2.053513e-03	6.899803e-03	0.06934307	0.00000000	0.307606000	FALSE
Baiap2	0.1021122251	-0.003663004	0.03600195	1.651463e-03	5.780121e-03	0.08029197	0.50208000	1.175170000	TRUE
Bdnf	0.1030868111	-0.003663004	0.03594263	1.488972e-03	5.437984e-03	0.06569343	0.00000000	0.323967000	FALSE
Cckar	0.1465487585	-0.003663004	0.03609417	1.579696e-05	7.582539e-05	0.06569343	0.00000000	0.506119000	FALSE
Cckbr	0.2581762367	-0.003663004	0.03603155	1.838529e-13	1.235492e-12	0.12408759	0.45745100	1.210610000	TRUE
Ccnd2	0.3040212906	-0.003663004	0.03614215	0.000000e+00	0.000000e+00	0.20802920	0.00000000	1.044130000	TRUE
Cd24a	0.3377948342	-0.003663004	0.03562455	0.000000e+00	0.000000e+00	0.08029197	1.09937000	1.619510000	TRUE
Cyr61	0.0802136237	-0.003663004	0.03610987	1.009448e-02	2.923919e-02	0.08029197	0.00000000	1.148340000	FALSE
Fezf1	0.2502812534	-0.003663004	0.03551992	4.359846e-13	2.817131e-12	0.05109489	0.00000000	0.216482000	FALSE
Fst	0.1096115521	-0.003663004	0.03609578	8.500432e-04	3.173495e-03	0.08394161	0.00000000	0.512062000	FALSE
Gem	0.1162162191	-0.003663004	0.03607676	4.454449e-04	1.740343e-03	0.10218978	0.00000000	0.561360000	FALSE
Greb1	0.0928801323	-0.003663004	0.03612567	3.765259e-03	1.150116e-02	0.06934307	0.00000000	0.739802000	FALSE
Grpr	0.2159421717	-0.003663004	0.03594119	4.977643e-10	2.883600e-09	0.09489051	0.00000000	0.483556000	FALSE
Irs4	0.0977420024	-0.003663004	0.03591480	2.375209e-03	7.673751e-03	0.05474453	0.00000000	0.420038000	FALSE
Lepr	0.0810359175	-0.003663004	0.03544279	8.430243e-03	2.529073e-02	0.05474453	0.00000000	0.187355000	FALSE
Lmod1	0.1133208255	-0.003663004	0.03583487	5.482396e-04	2.093279e-03	0.06204380	0.00000000	0.382038000	FALSE
Lpar1	0.0943075637	-0.003663004	0.03607834	3.308833e-03	1.048838e-02	0.08029197	0.06530100	1.036370000	FALSE
Mki67	0.0923483201	-0.003663004	0.03591370	3.754446e-03	1.150116e-02	0.06934307	0.00000000	0.312673000	FALSE
Mlc1	0.2650750357	-0.003663004	0.03536596	1.498801e-14	1.094776e-13	0.14598540	1.46011000	1.871470000	TRUE
Ndrg1	0.3526472308	-0.003663004	0.03610585	0.000000e+00	0.000000e+00	0.16423358	0.00000000	0.820718000	TRUE
Npy2r	0.0996618671	-0.003663004	0.03616769	2.139491e-03	7.047733e-03	0.10948905	0.00000000	0.850958000	FALSE
Omp	0.1646578640	-0.003663004	0.03579333	1.284498e-06	6.539265e-06	0.05109489	0.00000000	0.380592000	FALSE
Pdgfra	0.1834648046	-0.003663004	0.03449530	2.902051e-08	1.625148e-07	0.02919708	0.00000000	0.160970000	FALSE
Pou3f2	0.0728782650	-0.003663004	0.03613689	1.708363e-02	4.864492e-02	0.08759124	0.00000000	0.763292000	FALSE
Sema4d	0.1332935694	-0.003663004	0.03614415	7.557371e-05	3.255483e-04	0.12408759	0.00000000	0.861142000	TRUE
Serpinb1b	0.1374797844	-0.003663004	0.03599315	4.402188e-05	1.998831e-04	0.07664234	0.00000000	0.417388000	FALSE
Sgk1	0.1015774501	-0.003663004	0.03613893	1.794992e-03	6.154260e-03	0.08029197	0.00000000	0.683188000	FALSE
Tmem108	0.1290284666	-0.003663004	0.03611821	1.194797e-04	5.018149e-04	0.12408759	0.00000000	0.972259000	FALSE
Ttyh2	0.1365912163	-0.003663004	0.03603405	4.965552e-05	2.195297e-04	0.07664234	0.34882200	1.185420000	FALSE
Oxt	0.3477014091	-0.003663004	0.03422767	0.000000e+00	0.000000e+00	0.04379562	-0.02608660	-0.000599493	FALSE
Penk	0.4587748686	-0.003663004	0.03600918	0.000000e+00	0.000000e+00	0.21532847	-0.02823010	0.001581220	FALSE
Sst	0.2886150579	-0.003663004	0.03518352	0.000000e+00	0.000000e+00	0.14963504	-0.00904315	0.007473650	FALSE
Tac1	0.4260140939	-0.003663004	0.03591288	0.000000e+00	0.000000e+00	0.16423358	-0.00826085	0.009973200	FALSE
Gal	0.1238054818	-0.003663004	0.03187258	3.176302e-05	1.482274e-04	0.07299270	-0.01892340	-0.003348790	FALSE
Cartpt	0.1660021190	-0.003663004	0.03472843	5.158800e-07	2.708370e-06	0.10583942	-0.00760698	0.005456020	FALSE
Npas4	0.0775328113	-0.003663004	0.02763077	1.648482e-03	5.780121e-03	0.04744526	-0.00600548	0.009169580	FALSE
Vgf	0.2083785441	-0.003663004	0.03321660	8.648537e-11	5.381312e-10	0.10218978	-0.05235770	-0.018781200	FALSE
Trh	0.2691314602	-0.003663004	0.03341596	1.110223e-16	8.478067e-16	0.05839416	-0.01117600	0.007079730	FALSE
Nts	0.3555058627	-0.003663004	0.03586902	0.000000e+00	0.000000e+00	0.24817518	-0.00491096	0.016927600	FALSE
Scg2	0.2198542395	-0.003663004	0.03539887	1.357391e-10	8.144345e-10	0.13138686	-0.10108000	-0.061572700	FALSE
Avp	0.1894684144	-0.003663004	0.02601469	5.684342e-14	3.979039e-13	0.03649635	-0.01862120	0.016116700	FALSE
Gnrh1	0.2959945777	-0.003663004	0.03572700	0.000000e+00	0.000000e+00	0.18613139	0.00776418	0.016399900	FALSE
Vip	0.4312882995	-0.003663004	0.03604796	0.000000e+00	0.000000e+00	0.21532847	-0.00842155	0.009287270	FALSE
Egr1	0.0986081665	-0.003663004	0.02896194	2.068186e-04	8.272744e-04	0.02554745	-0.01684650	-0.003440700	FALSE
Tac2	0.2880806442	-0.003663004	0.03172190	0.000000e+00	0.000000e+00	0.09124088	-0.01502660	0.003090870	FALSE
Cck	0.1441025797	-0.003663004	0.03488489	1.138673e-05	5.626385e-05	0.08029197	0.00319049	0.014021200	FALSE
Crh	0.4961402788	-0.003663004	0.03576441	0.000000e+00	0.000000e+00	0.23722628	-0.00595760	0.015011200	FALSE
Ucn3	0.1262401494	-0.003663004	0.03573212	1.387355e-04	5.684774e-04	0.09124088	0.00743916	0.017147700	FALSE
Adcyap1	0.5093597377	-0.003663004	0.03602324	0.000000e+00	0.000000e+00	0.24817518	-0.01104950	0.008995130	FALSE
Nnat	0.6074370449	-0.003663004	0.03610816	0.000000e+00	0.000000e+00	0.36131387	0.07774530	0.340092000	FALSE
Sln	0.7452837750	-0.003663004	0.03612712	0.000000e+00	0.000000e+00	0.43795620	-0.01782790	0.287753000	TRUE
Mbp	0.4466287283	-0.003663004	0.03199460	0.000000e+00	0.000000e+00	0.10218978	-0.08197590	-0.056774700	FALSE
Arpp21	0.3116954323	-0.003663004	0.03607259	0.000000e+00	0.000000e+00	0.17883212	-0.03695420	0.056291100	FALSE
Fos	0.5751561663	-0.003663004	0.03462548	0.000000e+00	0.000000e+00	0.05839416	-0.07111030	-0.036968300	FALSE
Th	0.7468603050	-0.003663004	0.03419465	0.000000e+00	0.000000e+00	0.05109489	-0.08354080	-0.029178700	FALSE
polyT	0.5112339563	-0.003663004	0.03498526	0.000000e+00	0.000000e+00	0.17518248	3.63689000	3.912480000	FALSE
DAPI	0.5251933328	-0.003663004	0.03349208	0.000000e+00	0.000000e+00	0.13503650	4.22840000	4.590270000	FALSE
4732456N10Rik	-0.0077281010	-0.003663004	0.03539909	5.457125e-01	6.791089e-01				FALSE
Ace2	0.0460485671	-0.003663004	0.03562255	8.143128e-02	1.779329e-01				FALSE
Adora2a	-0.0364867392	-0.003663004	0.03555362	8.220531e-01	8.852880e-01				FALSE
Amigo2	0.0667594585	-0.003663004	0.03607965	2.547734e-02	6.793958e-02				FALSE
Ano3	0.0161156697	-0.003663004	0.03598388	2.912784e-01	4.369177e-01				FALSE
Arhgap36	0.0177270638	-0.003663004	0.03601100	2.762604e-01	4.181239e-01				FALSE
Avpr1a	-0.0014468603	-0.003663004	0.03573147	4.752726e-01	6.189597e-01				FALSE
Avpr2	-0.0169716669	-0.003663004	0.03566163	6.454975e-01	7.377114e-01				FALSE
Bmp7	-0.0204658971	-0.003663004	0.03585955	6.803133e-01	7.722476e-01				FALSE
Brs3	-0.0532314167	-0.003663004	0.03496640	9.218464e-01	9.329530e-01				FALSE
Calcr	0.0124072057	-0.003663004	0.03549915	3.253850e-01	4.732502e-01				FALSE
Cbln1	0.0216877629	-0.003663004	0.03587767	2.399110e-01	3.863066e-01				FALSE
Cbln2	0.0494763051	-0.003663004	0.03613188	7.068555e-02	1.604753e-01				FALSE
Cdkn1a	0.0522628898	-0.003663004	0.03613946	6.087108e-02	1.400869e-01				FALSE
Cenpe	0.0563033016	-0.003663004	0.03608384	4.827038e-02	1.192562e-01				FALSE
Chat	0.0279905854	-0.003663004	0.03578959	1.882305e-01	3.294034e-01				FALSE
Coch	0.0210759387	-0.003663004	0.03568920	2.440991e-01	3.868741e-01				FALSE
Col25a1	-0.0447741591	-0.003663004	0.03577612	8.747473e-01	9.071454e-01				FALSE
Cplx3	-0.0023498648	-0.003663004	0.03591061	4.854152e-01	6.273058e-01				FALSE
Cpne5	0.0108913606	-0.003663004	0.03557682	3.412343e-01	4.777280e-01				FALSE
Creb3l1	0.0119925239	-0.003663004	0.03616577	3.325501e-01	4.732502e-01				FALSE
Crhbp	0.0191311745	-0.003663004	0.03530090	2.592333e-01	3.995522e-01				FALSE
Crhr1	0.0286075785	-0.003663004	0.03533223	1.805301e-01	3.192531e-01				FALSE
Crhr2	0.0664247590	-0.003663004	0.03569648	2.479776e-02	6.719393e-02				FALSE
Cspg5	0.0561813412	-0.003663004	0.03593673	4.792948e-02	1.192562e-01				FALSE
Cxcl14	0.0634363664	-0.003663004	0.03602536	3.126215e-02	8.206315e-02				FALSE
Cyp19a1	-0.0486756421	-0.003663004	0.03564621	8.966624e-01	9.241674e-01				FALSE
Cyp26a1	0.0114283076	-0.003663004	0.03546331	3.352189e-01	4.732502e-01				FALSE
Dgkk	-0.0439352342	-0.003663004	0.03589614	8.690496e-01	9.071454e-01				FALSE
Ebf3	0.0120949425	-0.003663004	0.03504356	3.264752e-01	4.732502e-01				FALSE
Egr2	0.0220694946	-0.003663004	0.03585784	2.364941e-01	3.863066e-01				FALSE
Ermn	-0.0509858241	-0.003663004	0.03538235	9.094653e-01	9.316474e-01				FALSE
Esr1	0.0005163412	-0.003663004	0.03556256	4.532236e-01	5.995399e-01				FALSE
Etv1	0.0297623579	-0.003663004	0.03573529	1.748014e-01	3.124110e-01				FALSE
Fbxw13	-0.0161286840	-0.003663004	0.03558397	6.369497e-01	7.329284e-01				FALSE
Fn1	0.0457536730	-0.003663004	0.03596091	8.469325e-02	1.801072e-01				FALSE
Gabra1	0.0250330208	-0.003663004	0.03562904	2.102912e-01	3.604993e-01				FALSE
Gabrg1	0.0034512718	-0.003663004	0.03578979	4.212176e-01	5.661165e-01				FALSE
Gad1	0.0358457710	-0.003663004	0.03590140	1.355615e-01	2.648179e-01				FALSE
Galr1	-0.0413643580	-0.003663004	0.03472536	8.611943e-01	9.071454e-01				FALSE
Galr2	0.0525038712	-0.003663004	0.03595659	5.913521e-02	1.379821e-01				FALSE
Gbx2	0.0204821736	-0.003663004	0.03590980	2.506696e-01	3.899305e-01				FALSE
Gda	-0.0029035535	-0.003663004	0.03611502	4.916114e-01	6.304635e-01				FALSE
Gjc3	0.0115749003	-0.003663004	0.03551511	3.339419e-01	4.732502e-01				FALSE
Glra3	0.0040048806	-0.003663004	0.03565689	4.148656e-01	5.620760e-01				FALSE
Gpr165	0.0411877424	-0.003663004	0.03616046	1.074275e-01	2.174435e-01				FALSE
Htr2c	-0.0134783357	-0.003663004	0.03567695	6.083868e-01	7.147481e-01				FALSE
Igf1r	0.0318972019	-0.003663004	0.03591351	1.610474e-01	2.989236e-01				FALSE
Igf2r	0.0484666149	-0.003663004	0.03614883	7.463946e-02	1.671924e-01				FALSE
Isl1	-0.0093355447	-0.003663004	0.03532169	5.637944e-01	6.815759e-01				FALSE
Kiss1r	0.0456564044	-0.003663004	0.03580209	8.417013e-02	1.801072e-01				FALSE
Klf4	-0.0157945732	-0.003663004	0.03604622	6.317741e-01	7.319866e-01				FALSE
Man1a	0.0415126379	-0.003663004	0.03615156	1.057196e-01	2.165962e-01				FALSE
Mc4r	-0.0338206411	-0.003663004	0.03575633	8.005035e-01	8.732765e-01				FALSE
Myh11	0.0420020645	-0.003663004	0.03554984	9.947714e-02	2.063230e-01				FALSE
Ndnf	0.0120547544	-0.003663004	0.03596865	3.310611e-01	4.732502e-01				FALSE
Necab1	0.0344868251	-0.003663004	0.03554032	1.415405e-01	2.733196e-01				FALSE
Nos1	-0.0242052615	-0.003663004	0.03584794	7.166908e-01	8.080809e-01				FALSE
Npas1	-0.0317425848	-0.003663004	0.03449904	7.921556e-01	8.698179e-01				FALSE
Npy1r	-0.0411767440	-0.003663004	0.03603705	8.510569e-01	9.071454e-01				FALSE
Ntng1	0.0524915344	-0.003663004	0.03554936	5.709676e-02	1.351022e-01				FALSE
Ntsr1	0.0178639963	-0.003663004	0.03563057	2.728646e-01	4.167387e-01				FALSE
Nup62cl	0.0127293119	-0.003663004	0.03559863	3.225873e-01	4.732502e-01				FALSE
Onecut2	-0.0604688337	-0.003663004	0.03591775	9.431242e-01	9.487716e-01				FALSE
Opalin	-0.0044358395	-0.003663004	0.03572346	5.086300e-01	6.424800e-01				FALSE
Oprd1	0.0215177140	-0.003663004	0.03588670	2.414416e-01	3.863066e-01				FALSE
Oprk1	0.0005954018	-0.003663004	0.03564071	4.524469e-01	5.995399e-01				FALSE
Oprl1	0.0084600971	-0.003663004	0.03582965	3.675483e-01	5.061320e-01				FALSE
Oxtr	0.0370966300	-0.003663004	0.03562546	1.262879e-01	2.496044e-01				FALSE
Pak3	0.0467289651	-0.003663004	0.03613095	8.155259e-02	1.779329e-01				FALSE
Pcdh11x	-0.0148800750	-0.003663004	0.03574970	6.231509e-01	7.270094e-01				FALSE
Pgr	0.0216461152	-0.003663004	0.03536334	2.370920e-01	3.863066e-01				FALSE
Plin3	-0.0040912836	-0.003663004	0.03609387	5.047336e-01	6.423883e-01				FALSE
Pnoc	0.0334800771	-0.003663004	0.03611963	1.518961e-01	2.867253e-01				FALSE
Prlr	0.0102590012	-0.003663004	0.03539110	3.470209e-01	4.818142e-01				FALSE
Ramp3	-0.0411656215	-0.003663004	0.03504954	8.576879e-01	9.071454e-01				FALSE
Rgs2	0.0064637751	-0.003663004	0.03599239	3.892176e-01	5.316143e-01				FALSE
Rgs5	-0.0117446886	-0.003663004	0.03530225	5.905377e-01	7.009788e-01				FALSE
Rnd3	0.0259768907	-0.003663004	0.03614767	2.061175e-01	3.569870e-01				FALSE
Rxfp1	0.0446084283	-0.003663004	0.03555585	8.729170e-02	1.833126e-01				FALSE
Scgn	0.0210914666	-0.003663004	0.03505432	2.400398e-01	3.863066e-01				FALSE
Selplg	-0.0097449311	-0.003663004	0.03575461	5.675350e-01	6.815759e-01				FALSE
Sema3c	0.0291776131	-0.003663004	0.03507640	1.745698e-01	3.124110e-01				FALSE
Serpine1	-0.0119672982	-0.003663004	0.03549371	5.924940e-01	7.009788e-01				FALSE
Slc15a3	0.0307549755	-0.003663004	0.03586190	1.685939e-01	3.078671e-01				FALSE
Slc17a6	-0.0013594917	-0.003663004	0.03605942	4.745325e-01	6.189597e-01				FALSE
Slc17a7	-0.0524870834	-0.003663004	0.03452372	9.213511e-01	9.329530e-01				FALSE
Slc17a8	-0.0245561837	-0.003663004	0.03464044	7.267936e-01	8.140089e-01				FALSE
Slc18a2	0.0202087424	-0.003663004	0.03524599	2.491111e-01	3.899305e-01				FALSE
Slco1a4	0.0709679196	-0.003663004	0.03603933	1.918787e-02	5.372605e-02				FALSE
Sox4	-0.0289217791	-0.003663004	0.03613090	7.577523e-01	8.430622e-01				FALSE
Sox6	0.0597645642	-0.003663004	0.03612070	3.954509e-02	1.006602e-01				FALSE
Sox8	0.0690233403	-0.003663004	0.03616531	2.222428e-02	6.120786e-02				FALSE
Sp9	0.0310494296	-0.003663004	0.03518355	1.619170e-01	2.989236e-01				FALSE
Synpr	0.0340832075	-0.003663004	0.03604474	1.475026e-01	2.815960e-01				FALSE
Syt2	-0.0088361326	-0.003663004	0.03565262	5.576833e-01	6.815759e-01				FALSE
Syt4	0.0380870227	-0.003663004	0.03609267	1.236882e-01	2.473764e-01				FALSE
Sytl4	-0.0443925581	-0.003663004	0.03579483	8.724108e-01	9.071454e-01				FALSE
Tacr1	-0.0073569708	-0.003663004	0.03558016	5.413443e-01	6.787003e-01				FALSE
Tacr3	0.0234357267	-0.003663004	0.03605845	2.261692e-01	3.799642e-01				FALSE
Tiparp	0.0553406328	-0.003663004	0.03613201	5.123432e-02	1.247444e-01				FALSE
Traf4	-0.0098542540	-0.003663004	0.03615679	5.679799e-01	6.815759e-01				FALSE
Trhr	-0.0305985231	-0.003663004	0.03498197	7.793450e-01	8.613813e-01				FALSE
Ttn	0.0599329854	-0.003663004	0.03524786	3.559597e-02	9.200189e-02				FALSE
Blank-1	-0.0096817060	-0.003663004	0.03575931	5.668309e-01	6.815759e-01				FALSE
Blank-2	-0.0653554408	-0.003663004	0.03518831	9.602169e-01	9.602169e-01				FALSE
Blank-3	0.0521514756	-0.003663004	0.03468430	5.378473e-02	1.290834e-01				FALSE
Blank-4	-0.0349933937	-0.003663004	0.03501500	8.145451e-01	8.828618e-01				FALSE
Blank-5	0.0239675359	-0.003663004	0.03597527	2.212309e-01	3.754222e-01				FALSE

## Sheet: mPOA_Excitatory-E-1FN7_3
gene	observed	expected	sd	p.value	p.adj	minPercentCells	X10.	X90.	FINAL
Bdnf	1.632873e-01	-0.009345794	0.05774297	1.396339e-03	1.563900e-02	0.12037037	0.00000000	1.051620000	FALSE
Brs3	1.904823e-01	-0.009345794	0.05796104	2.827660e-04	6.786385e-03	0.19444444	0.00000000	1.222040000	TRUE
Coch	1.797644e-01	-0.009345794	0.05591906	3.599910e-04	7.559810e-03	0.06481481	0.00000000	0.184625000	FALSE
Col25a1	1.823171e-01	-0.009345794	0.05784832	4.611782e-04	7.747794e-03	0.17592593	0.00000000	0.967250000	FALSE
Gpr165	1.656363e-01	-0.009345794	0.05693549	1.058389e-03	1.270067e-02	0.12962963	1.12758000	1.571840000	FALSE
Irs4	2.008076e-01	-0.009345794	0.05757636	1.311229e-04	3.671441e-03	0.12962963	0.33731600	1.218920000	TRUE
Rgs5	1.339411e-01	-0.009345794	0.05547113	4.895995e-03	4.141400e-02	0.07407407	0.00000000	0.382533000	FALSE
Slco1a4	1.402021e-01	-0.009345794	0.05733851	4.551556e-03	4.141400e-02	0.09259259	0.00000000	0.448817000	FALSE
Tac1	3.323866e-01	-0.009345794	0.05767742	1.562537e-09	8.750207e-08	0.25925926	-0.02178340	0.080120700	FALSE
Npas4	1.807470e-01	-0.009345794	0.05714317	4.395524e-04	7.747794e-03	0.11111111	-0.01680150	0.016294700	FALSE
Vip	1.384852e-01	-0.009345794	0.05709097	4.807243e-03	4.141400e-02	0.11111111	-0.03313390	0.001080780	FALSE
Tac2	1.750006e-01	-0.009345794	0.05737109	6.562597e-04	9.767437e-03	0.12037037	-0.02582830	0.012648800	FALSE
Cck	1.407101e-01	-0.009345794	0.05749328	4.527474e-03	4.141400e-02	0.09259259	-0.03347030	-0.000782709	FALSE
Crh	1.693432e-01	-0.009345794	0.05700567	8.604920e-04	1.112020e-02	0.11111111	-0.02928210	-0.001133853	FALSE
Nnat	4.066267e-01	-0.009345794	0.05767875	2.758904e-13	2.317480e-11	0.28703704	-0.05303390	0.099017300	FALSE
Sln	5.380499e-01	-0.009345794	0.05774485	0.000000e+00	0.000000e+00	0.34259259	-0.12324200	0.448712000	TRUE
Mbp	1.741616e-01	-0.009345794	0.05742480	6.976741e-04	9.767437e-03	0.15740741	-0.17189500	-0.061521100	FALSE
Arpp21	2.689681e-01	-0.009345794	0.05015678	1.437526e-08	6.037610e-07	0.08333333	-0.00658319	0.054452500	FALSE
Th	2.760018e-01	-0.009345794	0.05255210	2.820792e-08	9.477862e-07	0.05555556	-0.01372880	0.051549200	FALSE
DAPI	1.379752e-01	-0.009345794	0.05708601	4.930238e-03	4.141400e-02	0.10185185	3.81178000	4.277580000	FALSE
4732456N10Rik	-1.514372e-02	-0.009345794	0.05751387	5.401490e-01	8.102236e-01				FALSE
Ace2	-6.211182e-02	-0.009345794	0.05229746	8.435030e-01	9.084649e-01				FALSE
Adora2a	-5.238052e-02	-0.009345794	0.05500257	7.830140e-01	8.888268e-01				FALSE
Aldh1l1	8.568936e-02	-0.009345794	0.05771522	4.981787e-02	1.992715e-01				FALSE
Amigo2	-2.348395e-02	-0.009345794	0.05741157	5.972594e-01	8.361631e-01				FALSE
Ano3	-1.818045e-02	-0.009345794	0.05655207	5.620708e-01	8.108412e-01				FALSE
Aqp4	-1.349049e-03	-0.009345794	0.05748334	4.446800e-01	7.253033e-01				FALSE
Ar	7.597094e-03	-0.009345794	0.05764202	3.844046e-01	6.657729e-01				FALSE
Arhgap36	6.193964e-02	-0.009345794	0.05770943	1.083692e-01	3.105378e-01				FALSE
Avpr1a	9.994791e-02	-0.009345794	0.05624159	2.599058e-02	1.364505e-01				FALSE
Avpr2	-5.223604e-02	-0.009345794	0.05625429	7.770998e-01	8.888268e-01				FALSE
Baiap2	1.043944e-01	-0.009345794	0.05782837	2.459981e-02	1.357218e-01				FALSE
Bmp7	2.632328e-02	-0.009345794	0.05638391	2.634939e-01	5.147323e-01				FALSE
Calcr	-4.453720e-02	-0.009345794	0.05708080	7.312240e-01	8.888268e-01				FALSE
Cbln1	-3.487049e-02	-0.009345794	0.05779350	6.706300e-01	8.529427e-01				FALSE
Cbln2	4.495622e-02	-0.009345794	0.05736531	1.719213e-01	3.871557e-01				FALSE
Cckar	1.251498e-02	-0.009345794	0.05759177	3.521280e-01	6.430164e-01				FALSE
Cckbr	1.681759e-02	-0.009345794	0.05685614	3.226978e-01	6.023692e-01				FALSE
Ccnd2	7.285871e-02	-0.009345794	0.05783007	7.758811e-02	2.555844e-01				FALSE
Cd24a	-1.230005e-01	-0.009345794	0.05745857	9.760373e-01	9.818818e-01				FALSE
Cdkn1a	7.105423e-02	-0.009345794	0.05750207	8.102485e-02	2.583365e-01				FALSE
Cenpe	2.409466e-02	-0.009345794	0.05721497	2.794519e-01	5.334992e-01				FALSE
Chat	-6.307681e-02	-0.009345794	0.05475865	8.367612e-01	9.084649e-01				FALSE
Cplx3	3.621270e-02	-0.009345794	0.05713695	2.126221e-01	4.409940e-01				FALSE
Cpne5	9.217639e-02	-0.009345794	0.05776489	3.941574e-02	1.742591e-01				FALSE
Creb3l1	1.264674e-01	-0.009345794	0.05760665	9.196864e-03	6.717709e-02				FALSE
Crhbp	-5.210515e-02	-0.009345794	0.05560540	7.790470e-01	8.888268e-01				FALSE
Crhr1	-1.635040e-02	-0.009345794	0.05661210	5.492354e-01	8.108412e-01				FALSE
Crhr2	5.878166e-02	-0.009345794	0.05647379	1.138403e-01	3.105378e-01				FALSE
Cspg5	1.138869e-01	-0.009345794	0.05588785	1.372704e-02	8.541271e-02				FALSE
Cxcl14	-2.475794e-02	-0.009345794	0.05775786	6.052041e-01	8.368019e-01				FALSE
Cyp19a1	2.472630e-03	-0.009345794	0.05254619	4.110227e-01	6.905181e-01				FALSE
Cyp26a1	3.673462e-02	-0.009345794	0.05675200	2.084069e-01	4.409940e-01				FALSE
Cyr61	-3.298519e-02	-0.009345794	0.05699423	6.608442e-01	8.529427e-01				FALSE
Dgkk	4.522203e-02	-0.009345794	0.05775536	1.723780e-01	3.871557e-01				FALSE
Ebf3	-7.010185e-02	-0.009345794	0.04995795	8.880350e-01	9.324367e-01				FALSE
Egr2	9.519353e-02	-0.009345794	0.05681615	3.288721e-02	1.625015e-01				FALSE
Ermn	-2.233595e-02	-0.009345794	0.05303604	5.967450e-01	8.361631e-01				FALSE
Esr1	5.952516e-02	-0.009345794	0.05727764	1.146032e-01	3.105378e-01				FALSE
Etv1	1.409041e-02	-0.009345794	0.05673678	3.397781e-01	6.272826e-01				FALSE
Fbxw13	-5.025036e-02	-0.009345794	0.05555811	7.692102e-01	8.888268e-01				FALSE
Fezf1	8.009859e-03	-0.009345794	0.05764586	3.816791e-01	6.657729e-01				FALSE
Fn1	-5.308433e-02	-0.009345794	0.05636150	7.811360e-01	8.888268e-01				FALSE
Fst	5.300910e-02	-0.009345794	0.05746479	1.389392e-01	3.382868e-01				FALSE
Gabra1	1.010987e-02	-0.009345794	0.05754099	3.676370e-01	6.567841e-01				TRUE
Gabrg1	3.484223e-02	-0.009345794	0.05736096	2.205461e-01	4.518506e-01				FALSE
Gad1	-6.318821e-02	-0.009345794	0.05677972	8.285036e-01	9.084649e-01				FALSE
Galr1	5.799710e-02	-0.009345794	0.05722809	1.196485e-01	3.132869e-01				FALSE
Galr2	-4.326303e-02	-0.009345794	0.05741600	7.226486e-01	8.888268e-01				FALSE
Gbx2	7.630795e-02	-0.009345794	0.05465828	5.854833e-02	2.164949e-01				FALSE
Gda	1.104563e-02	-0.009345794	0.05750373	3.614407e-01	6.529252e-01				FALSE
Gem	-2.591181e-02	-0.009345794	0.05722824	6.138902e-01	8.384841e-01				FALSE
Gjc3	1.219017e-01	-0.009345794	0.05744151	1.115967e-02	7.210865e-02				FALSE
Glra3	1.237694e-01	-0.009345794	0.05760448	1.042063e-02	7.002666e-02				TRUE
Greb1	9.866897e-02	-0.009345794	0.05602324	2.692538e-02	1.370747e-01				FALSE
Grpr	-5.831678e-02	-0.009345794	0.05513113	8.128006e-01	9.057914e-01				FALSE
Htr2c	-5.330718e-02	-0.009345794	0.05761875	7.772594e-01	8.888268e-01				FALSE
Igf1r	-4.879687e-02	-0.009345794	0.05761893	7.532300e-01	8.888268e-01				FALSE
Igf2r	-5.667064e-02	-0.009345794	0.05775167	7.937363e-01	8.949510e-01				FALSE
Isl1	6.186698e-03	-0.009345794	0.05628604	3.912908e-01	6.707842e-01				FALSE
Kiss1r	2.578353e-02	-0.009345794	0.05775756	2.715206e-01	5.243157e-01				FALSE
Klf4	5.298778e-02	-0.009345794	0.05633875	1.342752e-01	3.382868e-01				FALSE
Lepr	-1.493734e-02	-0.009345794	0.05711922	5.389912e-01	8.102236e-01				FALSE
Lmod1	1.884137e-02	-0.009345794	0.05618878	3.079565e-01	5.813111e-01				FALSE
Lpar1	-1.710212e-02	-0.009345794	0.05751093	5.536415e-01	8.108412e-01				FALSE
Man1a	1.022944e-01	-0.009345794	0.05698216	2.504391e-02	1.357218e-01				FALSE
Mc4r	1.156166e-01	-0.009345794	0.05735071	1.466893e-02	8.801360e-02				FALSE
Mki67	-1.382773e-02	-0.009345794	0.05734851	5.311467e-01	8.102236e-01				FALSE
Mlc1	2.732787e-02	-0.009345794	0.05748810	2.617580e-01	5.147323e-01				FALSE
Myh11	-9.986756e-02	-0.009345794	0.05627217	9.461527e-01	9.692296e-01				FALSE
Ndnf	-6.851186e-03	-0.009345794	0.05710156	4.825769e-01	7.648388e-01				FALSE
Ndrg1	-1.223522e-02	-0.009345794	0.05748977	5.200423e-01	8.015331e-01				FALSE
Necab1	6.430534e-02	-0.009345794	0.05716089	9.878801e-02	3.017525e-01				FALSE
Nos1	1.095271e-01	-0.009345794	0.05686837	1.829471e-02	1.059832e-01				FALSE
Npas1	1.213386e-01	-0.009345794	0.05630168	1.013951e-02	7.002666e-02				FALSE
Npy1r	3.156215e-02	-0.009345794	0.05772122	2.392504e-01	4.799066e-01				FALSE
Npy2r	-6.753684e-02	-0.009345794	0.05765726	8.435745e-01	9.084649e-01				FALSE
Ntng1	-2.207168e-02	-0.009345794	0.05692046	5.884553e-01	8.361631e-01				FALSE
Ntsr1	8.290277e-02	-0.009345794	0.05764527	5.476826e-02	2.139783e-01				FALSE
Nup62cl	7.943400e-02	-0.009345794	0.05687876	5.927838e-02	2.164949e-01				FALSE
Omp	-1.443000e-04	-0.009345794	0.05764881	4.365930e-01	7.190944e-01				FALSE
Onecut2	-1.451689e-01	-0.009345794	0.05749712	9.909180e-01	9.909180e-01				FALSE
Opalin	7.684465e-02	-0.009345794	0.05622064	6.262871e-02	2.238643e-01				FALSE
Oprd1	-5.756377e-03	-0.009345794	0.05731634	4.750327e-01	7.600523e-01				FALSE
Oprk1	1.281232e-01	-0.009345794	0.05740055	8.312294e-03	6.347570e-02				FALSE
Oprl1	-4.375366e-02	-0.009345794	0.05697483	7.270494e-01	8.888268e-01				FALSE
Oxtr	5.033202e-03	-0.009345794	0.05625049	3.991205e-01	6.772953e-01				FALSE
Pak3	5.966498e-02	-0.009345794	0.05637132	1.104350e-01	3.105378e-01				FALSE
Pcdh11x	5.878415e-02	-0.009345794	0.05782688	1.193642e-01	3.132869e-01				FALSE
Pdgfra	3.536423e-02	-0.009345794	0.05363415	2.022501e-01	4.356156e-01				FALSE
Pgr	-1.752672e-02	-0.009345794	0.05781851	5.562599e-01	8.108412e-01				FALSE
Plin3	-2.896900e-02	-0.009345794	0.05621176	6.364908e-01	8.529427e-01				FALSE
Pnoc	6.264093e-02	-0.009345794	0.05788828	1.068334e-01	3.105378e-01				FALSE
Pou3f2	6.650539e-02	-0.009345794	0.05739193	9.314484e-02	2.897840e-01				FALSE
Prlr	-2.875855e-02	-0.009345794	0.05691211	6.334861e-01	8.529427e-01				FALSE
Ramp3	9.197614e-05	-0.009345794	0.05627008	4.334007e-01	7.190944e-01				FALSE
Rgs2	-1.103564e-01	-0.009345794	0.05757627	9.603172e-01	9.718873e-01				FALSE
Rnd3	-7.538623e-02	-0.009345794	0.05756131	8.743724e-01	9.238652e-01				FALSE
Rxfp1	-1.038092e-01	-0.009345794	0.05550663	9.556073e-01	9.718873e-01				FALSE
Scgn	-3.485542e-02	-0.009345794	0.05653021	6.740977e-01	8.529427e-01				FALSE
Selplg	-6.749588e-02	-0.009345794	0.05587044	8.510164e-01	9.106417e-01				FALSE
Sema3c	9.307049e-02	-0.009345794	0.05774303	3.806001e-02	1.728130e-01				FALSE
Sema4d	7.027035e-02	-0.009345794	0.05707009	8.149900e-02	2.583365e-01				FALSE
Serpinb1b	7.593861e-02	-0.009345794	0.05747879	6.893706e-02	2.412797e-01				FALSE
Serpine1	9.493807e-02	-0.009345794	0.05716477	3.405577e-02	1.634677e-01				FALSE
Sgk1	-9.024945e-02	-0.009345794	0.05717034	9.214853e-01	9.556144e-01				FALSE
Slc15a3	8.521583e-02	-0.009345794	0.05511614	4.311037e-02	1.857062e-01				FALSE
Slc17a6	-4.654271e-02	-0.009345794	0.05752361	7.410667e-01	8.888268e-01				FALSE
Slc17a7	4.369046e-02	-0.009345794	0.05620439	1.726789e-01	3.871557e-01				FALSE
Slc17a8	-4.843193e-02	-0.009345794	0.05200543	7.738475e-01	8.888268e-01				FALSE
Slc18a2	-1.002360e-01	-0.009345794	0.05744421	9.432020e-01	9.692296e-01				FALSE
Sox4	-3.562595e-02	-0.009345794	0.05782890	6.752463e-01	8.529427e-01				FALSE
Sox6	4.118081e-02	-0.009345794	0.05634255	1.849194e-01	4.087692e-01				FALSE
Sox8	-2.514206e-02	-0.009345794	0.05780438	6.076776e-01	8.368019e-01				FALSE
Sp9	-7.026387e-02	-0.009345794	0.05526315	8.648403e-01	9.195770e-01				FALSE
Synpr	-3.508097e-03	-0.009345794	0.05538918	4.580315e-01	7.398971e-01				FALSE
Syt2	-8.191832e-03	-0.009345794	0.05565160	4.917283e-01	7.718027e-01				FALSE
Syt4	1.286811e-01	-0.009345794	0.05717542	7.887181e-03	6.309745e-02				FALSE
Sytl4	3.075766e-02	-0.009345794	0.05676736	2.399533e-01	4.799066e-01				FALSE
Tacr1	4.512377e-02	-0.009345794	0.05776126	1.728374e-01	3.871557e-01				FALSE
Tacr3	-3.732686e-02	-0.009345794	0.05725402	6.874793e-01	8.619144e-01				FALSE
Tiparp	-8.793182e-02	-0.009345794	0.05778003	9.130993e-01	9.527992e-01				FALSE
Tmem108	-5.146243e-02	-0.009345794	0.05756884	7.677898e-01	8.888268e-01				FALSE
Traf4	-6.061872e-02	-0.009345794	0.05740148	8.141339e-01	9.057914e-01				FALSE
Trhr	-1.872102e-02	-0.009345794	0.05755958	5.646930e-01	8.108412e-01				FALSE
Ttn	-6.397784e-02	-0.009345794	0.05441997	8.422859e-01	9.084649e-01				FALSE
Ttyh2	-8.806197e-03	-0.009345794	0.05604205	4.961589e-01	7.718027e-01				FALSE
Blank-1	7.980188e-02	-0.009345794	0.05692314	5.866190e-02	2.164949e-01				FALSE
Blank-2	-3.368386e-02	-0.009345794	0.05556035	6.693240e-01	8.529427e-01				FALSE
Blank-3	-3.233086e-02	-0.009345794	0.05453534	6.632944e-01	8.529427e-01				FALSE
Blank-4	-3.633700e-02	-0.009345794	0.05221241	6.974045e-01	8.678811e-01				FALSE
Blank-5	6.040053e-02	-0.009345794	0.05767098	1.132578e-01	3.105378e-01				FALSE
Oxt	5.390059e-02	-0.009345794	0.05765639	1.363309e-01	3.382868e-01				FALSE
Penk	9.301411e-02	-0.009345794	0.05679535	3.575236e-02	1.668444e-01				FALSE
Sst	6.200848e-02	-0.009345794	0.05775349	1.083228e-01	3.105378e-01				FALSE
Gal	8.505271e-02	-0.009345794	0.05699775	4.884276e-02	1.992715e-01				FALSE
Cartpt	5.811339e-02	-0.009345794	0.05770929	1.212122e-01	3.132869e-01				FALSE
Vgf	5.209985e-02	-0.009345794	0.05642204	1.380690e-01	3.382868e-01				FALSE
Trh	-2.970418e-02	-0.009345794	0.05523535	6.437778e-01	8.529427e-01				FALSE
Nts	7.072115e-02	-0.009345794	0.05592823	7.612893e-02	2.555844e-01				FALSE
Scg2	9.448197e-03	-0.009345794	0.05727102	3.713958e-01	6.567841e-01				FALSE
Avp	3.674383e-02	-0.009345794	0.05750825	2.114374e-01	4.409940e-01				FALSE
Gnrh1	4.303410e-02	-0.009345794	0.05391586	1.656467e-01	3.871557e-01				FALSE
Egr1	4.493083e-02	-0.009345794	0.05697076	1.703684e-01	3.871557e-01				FALSE
Ucn3	-3.274255e-02	-0.009345794	0.05676289	6.598977e-01	8.529427e-01				FALSE
Adcyap1	4.049888e-02	-0.009345794	0.05734708	1.923756e-01	4.197285e-01				FALSE
Fos	8.754150e-02	-0.009345794	0.05775401	4.671403e-02	1.961989e-01				FALSE
polyT	7.438006e-02	-0.009345794	0.05756682	7.291611e-02	2.499981e-01				FALSE

## Sheet: mPOA_Excitatory-E-10FN7_9
gene	observed	expected	sd	p.value	p.adj	minPercentCells	X10.	X90.	FINAL
Cbln1	0.296859191	-0.03030303	0.11324749	1.932876e-03	1.709069e-02	0.11764706	0.000000000	0.630868000	FALSE
Cdkn1a	0.316150541	-0.03030303	0.11455533	1.245907e-03	1.308202e-02	0.14705882	0.000000000	0.421496000	FALSE
Chat	0.274763270	-0.03030303	0.08264498	1.115613e-04	1.874229e-03	0.11764706	0.000000000	0.199734000	FALSE
Cpne5	0.270529093	-0.03030303	0.11237486	3.713775e-03	2.889339e-02	0.08823529	0.000000000	0.353818000	FALSE
Crhr1	0.252746012	-0.03030303	0.10830384	4.481372e-03	3.159289e-02	0.14705882	0.000000000	0.294039000	FALSE
Fst	0.295045880	-0.03030303	0.11202596	1.840800e-03	1.709069e-02	0.17647059	0.000000000	0.484149000	FALSE
Igf1r	0.265300699	-0.03030303	0.11321271	4.513270e-03	3.159289e-02	0.20588235	0.291552000	0.926846000	FALSE
Isl1	0.030303030	-0.03030303	0.01494139	2.493312e-05	5.983948e-04	0.02941176	0.000000000	0.000000000	FALSE
Ntsr1	0.343214313	-0.03030303	0.11384764	5.174690e-04	7.015521e-03	0.20588235	0.059496000	0.997989000	FALSE
Onecut2	0.264562993	-0.03030303	0.11031558	3.759576e-03	2.889339e-02	0.11764706	0.000000000	0.517121000	FALSE
Serpinb1b	0.456080541	-0.03030303	0.10294188	1.151502e-06	5.403784e-05	0.11764706	0.000000000	0.255913000	FALSE
Slc17a8	0.283048621	-0.03030303	0.09652649	5.846267e-04	7.015521e-03	0.14705882	0.000000000	0.118223000	FALSE
Trhr	0.030303030	-0.03030303	0.01494139	2.493312e-05	5.983948e-04	0.02941176	0.000000000	0.000000000	FALSE
Blank-4	0.349278272	-0.03030303	0.08500614	3.997085e-06	1.343020e-04	0.08823529	0.000000000	0.000000000	FALSE
Oxt	0.364709321	-0.03030303	0.11399040	2.648079e-04	4.044339e-03	0.29411765	-0.016452300	0.008956730	FALSE
Penk	0.319653419	-0.03030303	0.11186582	8.789268e-04	9.843980e-03	0.26470588	0.000989851	0.164742000	FALSE
Cartpt	0.399806164	-0.03030303	0.11324670	7.293878e-05	1.361524e-03	0.26470588	-0.015004800	0.004058200	FALSE
Npas4	0.249706146	-0.03030303	0.10847516	4.921154e-03	3.307015e-02	0.14705882	-0.003647700	0.011588050	FALSE
Vgf	0.384774650	-0.03030303	0.10806766	6.129063e-05	1.287103e-03	0.20588235	-0.072986800	-0.001301254	FALSE
Gnrh1	0.228504458	-0.03030303	0.10620691	7.408457e-03	4.609706e-02	0.08823529	-0.003243940	0.008462800	FALSE
Vip	0.306681560	-0.03030303	0.11455969	1.632800e-03	1.613590e-02	0.23529412	-0.021509700	0.009414300	FALSE
Tac2	0.570113165	-0.03030303	0.11252794	4.758626e-08	3.997246e-06	0.26470588	-0.033316900	0.002531350	FALSE
Cck	0.251665476	-0.03030303	0.10983766	5.127081e-03	3.312883e-02	0.17647059	-0.005633630	0.014998800	FALSE
Crh	0.476654688	-0.03030303	0.10781197	1.286615e-06	5.403784e-05	0.32352941	-0.025701100	0.012724300	FALSE
Adcyap1	0.597021015	-0.03030303	0.11397070	1.853638e-08	3.114112e-06	0.35294118	-0.026634600	0.017782600	FALSE
Nnat	0.336600715	-0.03030303	0.11240548	5.490444e-04	7.015521e-03	0.14705882	-0.031007200	0.050326700	FALSE
Mbp	0.244803893	-0.03030303	0.11420706	8.001580e-03	4.800948e-02	0.14705882	0.024640100	0.297009000	FALSE
polyT	0.274391910	-0.03030303	0.11408424	3.783659e-03	2.889339e-02	0.23529412	3.533510000	3.856240000	FALSE
4732456N10Rik	-0.037838485	-0.03030303	0.10057648	5.298619e-01	7.237138e-01				FALSE
Ace2	-0.094612174	-0.03030303	0.10656738	7.268986e-01	8.316500e-01				FALSE
Adora2a	-0.161367130	-0.03030303	0.11219199	8.786395e-01	9.186510e-01				FALSE
Aldh1l1	0.012713467	-0.03030303	0.11479885	3.539374e-01	6.520804e-01				FALSE
Amigo2	-0.068711622	-0.03030303	0.11517048	6.306191e-01	8.149539e-01				FALSE
Ano3	0.092338899	-0.03030303	0.10839765	1.289418e-01	3.800389e-01				FALSE
Aqp4	0.180851552	-0.03030303	0.11214413	2.985793e-02	1.355711e-01				FALSE
Ar	-0.164180371	-0.03030303	0.11375831	8.803738e-01	9.186510e-01				FALSE
Arhgap36	-0.019402663	-0.03030303	0.10879376	4.600956e-01	7.026914e-01				FALSE
Avpr1a	-0.025989834	-0.03030303	0.10147219	4.830476e-01	7.081239e-01				FALSE
Avpr2	-0.014119374	-0.03030303	0.10797672	4.404293e-01	6.960608e-01				FALSE
Baiap2	0.096911979	-0.03030303	0.11553832	1.354345e-01	3.922932e-01				FALSE
Bdnf	0.001848663	-0.03030303	0.11522407	3.901085e-01	6.553823e-01				FALSE
Bmp7	-0.081968696	-0.03030303	0.11259842	6.768287e-01	8.266273e-01				FALSE
Brs3	-0.079761092	-0.03030303	0.10637357	6.790153e-01	8.266273e-01				FALSE
Calcr	-0.017289501	-0.03030303	0.10702574	4.516109e-01	6.960608e-01				FALSE
Cbln2	0.231576213	-0.03030303	0.11395597	1.077879e-02	6.036122e-02				FALSE
Cckar	-0.094350220	-0.03030303	0.11516228	7.109449e-01	8.316500e-01				FALSE
Cckbr	-0.100681994	-0.03030303	0.11286956	7.335360e-01	8.316500e-01				FALSE
Ccnd2	-0.046856730	-0.03030303	0.10600234	5.620479e-01	7.493973e-01				FALSE
Cd24a	0.100939104	-0.03030303	0.11191674	1.204628e-01	3.613883e-01				FALSE
Cenpe	-0.030803547	-0.03030303	0.11497438	5.017367e-01	7.204425e-01				FALSE
Coch	-0.002458824	-0.03030303	0.09795675	3.881094e-01	6.553823e-01				FALSE
Col25a1	0.117828837	-0.03030303	0.11559739	1.000184e-01	3.309800e-01				FALSE
Cplx3	0.039773225	-0.03030303	0.10431140	2.508560e-01	5.773123e-01				FALSE
Creb3l1	-0.194903597	-0.03030303	0.11445837	9.247947e-01	9.416091e-01				FALSE
Crhbp	-0.075003280	-0.03030303	0.09710487	6.773602e-01	8.266273e-01				FALSE
Crhr2	-0.230306283	-0.03030303	0.11066456	9.646417e-01	9.646417e-01				FALSE
Cspg5	-0.108573466	-0.03030303	0.11424324	7.533662e-01	8.381823e-01				FALSE
Cxcl14	-0.016366160	-0.03030303	0.11439151	4.515149e-01	6.960608e-01				FALSE
Cyp19a1	-0.130621432	-0.03030303	0.10765531	8.242925e-01	9.051055e-01				FALSE
Cyp26a1	-0.083554094	-0.03030303	0.10550232	6.931287e-01	8.316500e-01				FALSE
Cyr61	0.084148336	-0.03030303	0.11172012	1.528121e-01	4.140714e-01				FALSE
Dgkk	0.007940311	-0.03030303	0.11333999	3.678996e-01	6.520804e-01				FALSE
Ebf3	0.104426231	-0.03030303	0.09138819	7.020682e-02	2.621055e-01				FALSE
Egr2	0.135711857	-0.03030303	0.10768968	6.158488e-02	2.463395e-01				FALSE
Ermn	0.008184616	-0.03030303	0.11481887	3.687359e-01	6.520804e-01				FALSE
Esr1	0.081622174	-0.03030303	0.10491856	1.430352e-01	4.072867e-01				FALSE
Etv1	0.040219822	-0.03030303	0.10058265	2.416068e-01	5.637492e-01				FALSE
Fbxw13	0.098393758	-0.03030303	0.10773349	1.161247e-01	3.547080e-01				FALSE
Fezf1	0.025308235	-0.03030303	0.10986664	3.063684e-01	6.354309e-01				FALSE
Fn1	-0.119283527	-0.03030303	0.08833338	8.431109e-01	9.079656e-01				FALSE
Gabra1	0.010443105	-0.03030303	0.11474363	3.612551e-01	6.520804e-01				FALSE
Gabrg1	0.178576917	-0.03030303	0.11424041	3.374295e-02	1.491794e-01				FALSE
Gad1	-0.005267519	-0.03030303	0.11528112	4.140382e-01	6.819453e-01				FALSE
Galr1	-0.023712992	-0.03030303	0.11175667	4.764889e-01	7.081239e-01				FALSE
Galr2	-0.084288999	-0.03030303	0.10476984	6.968219e-01	8.316500e-01				FALSE
Gbx2	0.160492638	-0.03030303	0.09361592	2.077154e-02	9.970338e-02				FALSE
Gda	-0.038170339	-0.03030303	0.10531434	5.297745e-01	7.237138e-01				FALSE
Gem	-0.013311884	-0.03030303	0.11223059	4.398321e-01	6.960608e-01				FALSE
Gjc3	-0.095723744	-0.03030303	0.11529637	7.147833e-01	8.316500e-01				FALSE
Glra3	0.032446528	-0.03030303	0.11134326	2.865239e-01	6.243948e-01				FALSE
Gpr165	0.114831196	-0.03030303	0.11348864	1.004761e-01	3.309800e-01				FALSE
Greb1	0.114019841	-0.03030303	0.10881864	9.237517e-02	3.167149e-01				FALSE
Grpr	0.026114367	-0.03030303	0.10724947	2.994306e-01	6.324284e-01				FALSE
Htr2c	0.038359898	-0.03030303	0.08959578	2.217300e-01	5.478036e-01				FALSE
Igf2r	0.042061054	-0.03030303	0.11561060	2.656806e-01	5.951245e-01				FALSE
Irs4	-0.046640285	-0.03030303	0.10911971	5.595067e-01	7.493973e-01				FALSE
Kiss1r	-0.056866364	-0.03030303	0.11466060	5.916025e-01	7.710457e-01				FALSE
Klf4	0.005778123	-0.03030303	0.10762368	3.687172e-01	6.520804e-01				FALSE
Lepr	0.009755470	-0.03030303	0.11045453	3.584259e-01	6.520804e-01				FALSE
Lmod1	-0.156373818	-0.03030303	0.10958706	8.750139e-01	9.186510e-01				FALSE
Lpar1	0.024759944	-0.03030303	0.11359081	3.139274e-01	6.431683e-01				FALSE
Man1a	0.237881464	-0.03030303	0.11368712	9.162872e-03	5.308147e-02				FALSE
Mc4r	-0.191201988	-0.03030303	0.11253777	9.236032e-01	9.416091e-01				FALSE
Mki67	-0.022498386	-0.03030303	0.10812269	4.712280e-01	7.081239e-01				FALSE
Mlc1	0.056429199	-0.03030303	0.11543817	2.262269e-01	5.497089e-01				FALSE
Myh11	0.056785697	-0.03030303	0.10122373	1.947956e-01	5.030256e-01				FALSE
Ndnf	-0.043218207	-0.03030303	0.11360806	5.452550e-01	7.387326e-01				FALSE
Ndrg1	0.014018463	-0.03030303	0.11467985	3.495705e-01	6.520804e-01				FALSE
Necab1	-0.151014018	-0.03030303	0.10552775	8.736631e-01	9.186510e-01				FALSE
Nos1	0.167115470	-0.03030303	0.09390853	1.776602e-02	9.214592e-02				FALSE
Npas1	0.093321194	-0.03030303	0.10221389	1.132419e-01	3.523083e-01				FALSE
Npy1r	-0.012283911	-0.03030303	0.11344094	4.368969e-01	6.960608e-01				FALSE
Npy2r	0.034739989	-0.03030303	0.11254896	2.816629e-01	6.226232e-01				FALSE
Ntng1	-0.106485683	-0.03030303	0.11582871	7.446404e-01	8.339972e-01				FALSE
Nup62cl	-0.096697331	-0.03030303	0.11244506	7.225588e-01	8.316500e-01				FALSE
Omp	0.008862647	-0.03030303	0.11367428	3.652190e-01	6.520804e-01				FALSE
Opalin	0.001981972	-0.03030303	0.10963815	3.841999e-01	6.553823e-01				FALSE
Oprd1	-0.179750459	-0.03030303	0.11383081	9.053901e-01	9.389231e-01				FALSE
Oprk1	-0.155103022	-0.03030303	0.10733013	8.775381e-01	9.186510e-01				FALSE
Oprl1	-0.073547630	-0.03030303	0.11106284	6.514990e-01	8.250395e-01				FALSE
Oxtr	-0.121565787	-0.03030303	0.10809401	8.007465e-01	8.850356e-01				FALSE
Pak3	0.054274740	-0.03030303	0.11398707	2.290454e-01	5.497089e-01				FALSE
Pcdh11x	-0.024981959	-0.03030303	0.11374728	4.813444e-01	7.081239e-01				FALSE
Pdgfra	0.133633491	-0.03030303	0.10799457	6.450630e-02	2.520246e-01				FALSE
Pgr	0.110935930	-0.03030303	0.11510919	1.099113e-01	3.523083e-01				FALSE
Plin3	0.155952236	-0.03030303	0.10906186	4.383723e-02	1.841163e-01				FALSE
Pnoc	0.086832371	-0.03030303	0.11368621	1.514253e-01	4.140714e-01				FALSE
Pou3f2	0.003112235	-0.03030303	0.11227417	3.829958e-01	6.553823e-01				FALSE
Prlr	0.057593293	-0.03030303	0.09571982	1.792396e-01	4.779723e-01				FALSE
Ramp3	0.155006608	-0.03030303	0.10451544	3.811137e-02	1.641721e-01				FALSE
Rgs2	0.084777360	-0.03030303	0.11040769	1.486311e-01	4.140714e-01				FALSE
Rgs5	0.123858480	-0.03030303	0.11019874	8.091538e-02	2.955170e-01				FALSE
Rnd3	-0.027088363	-0.03030303	0.11596862	4.889427e-01	7.081239e-01				FALSE
Rxfp1	-0.027824264	-0.03030303	0.08196346	4.879369e-01	7.081239e-01				FALSE
Scgn	-0.014708105	-0.03030303	0.10840450	4.428060e-01	6.960608e-01				FALSE
Selplg	0.055218449	-0.03030303	0.10758255	2.133247e-01	5.349038e-01				FALSE
Sema3c	0.067015477	-0.03030303	0.11256331	1.936383e-01	5.030256e-01				FALSE
Sema4d	-0.231369555	-0.03030303	0.11358134	9.616566e-01	9.646417e-01				FALSE
Serpine1	-0.071561638	-0.03030303	0.09125749	6.744059e-01	8.266273e-01				FALSE
Sgk1	0.011274390	-0.03030303	0.11516353	3.590387e-01	6.520804e-01				FALSE
Slc15a3	-0.090852819	-0.03030303	0.09521207	7.375944e-01	8.316500e-01				FALSE
Slc17a6	0.208026074	-0.03030303	0.11377874	1.810009e-02	9.214592e-02				FALSE
Slc17a7	-0.053322211	-0.03030303	0.10793492	5.844415e-01	7.710457e-01				FALSE
Slc18a2	-0.069586140	-0.03030303	0.10192871	6.500287e-01	8.250395e-01				FALSE
Slco1a4	-0.227631079	-0.03030303	0.11300474	9.596113e-01	9.646417e-01				FALSE
Sox4	0.001754415	-0.03030303	0.11478040	3.900097e-01	6.553823e-01				FALSE
Sox6	0.017889249	-0.03030303	0.11343381	3.354733e-01	6.520804e-01				FALSE
Sox8	0.032806171	-0.03030303	0.11398055	2.898976e-01	6.243948e-01				FALSE
Sp9	-0.095446477	-0.03030303	0.10417274	7.341262e-01	8.316500e-01				FALSE
Synpr	-0.137185699	-0.03030303	0.11033053	8.336650e-01	9.061839e-01				FALSE
Syt2	0.194638976	-0.03030303	0.11198490	2.228545e-02	1.039988e-01				FALSE
Syt4	-0.036323232	-0.03030303	0.11134278	5.215599e-01	7.237138e-01				FALSE
Sytl4	-0.089022142	-0.03030303	0.10505035	7.119060e-01	8.316500e-01				FALSE
Tacr1	-0.076609871	-0.03030303	0.10812850	6.657682e-01	8.266273e-01				FALSE
Tacr3	-0.034641643	-0.03030303	0.11424973	5.151461e-01	7.221260e-01				FALSE
Tiparp	-0.002050415	-0.03030303	0.11414113	4.022515e-01	6.690917e-01				FALSE
Tmem108	0.140088619	-0.03030303	0.11537269	6.985387e-02	2.621055e-01				FALSE
Traf4	0.016837223	-0.03030303	0.11523935	3.412464e-01	6.520804e-01				FALSE
Ttn	-0.128648361	-0.03030303	0.10051614	8.360626e-01	9.061839e-01				FALSE
Ttyh2	0.029707512	-0.03030303	0.11516625	3.011564e-01	6.324284e-01				FALSE
Blank-1	0.061290055	-0.03030303	0.10773590	1.976172e-01	5.030256e-01				FALSE
Blank-2	-0.049634759	-0.03030303	0.08302971	5.920529e-01	7.710457e-01				FALSE
Blank-3	-0.170772202	-0.03030303	0.10417546	9.112335e-01	9.391855e-01				FALSE
Blank-5	-0.034267984	-0.03030303	0.11262067	5.140424e-01	7.221260e-01				FALSE
Sst	0.149193075	-0.03030303	0.10650038	4.595539e-02	1.883050e-01				FALSE
Tac1	0.091352656	-0.03030303	0.09980082	1.114250e-01	3.523083e-01				FALSE
Gal	-0.078651212	-0.03030303	0.07620373	7.371095e-01	8.316500e-01				FALSE
Trh	0.119324840	-0.03030303	0.10959076	8.607421e-02	3.012597e-01				FALSE
Nts	-0.017127798	-0.03030303	0.09898878	4.470578e-01	6.960608e-01				FALSE
Scg2	0.202230669	-0.03030303	0.10826914	1.586730e-02	8.599056e-02				FALSE
Avp	0.049668624	-0.03030303	0.11294620	2.394568e-01	5.637492e-01				FALSE
Egr1	-0.069950897	-0.03030303	0.10066591	6.531563e-01	8.250395e-01				FALSE
Ucn3	0.119236049	-0.03030303	0.10918794	8.541266e-02	3.012597e-01				FALSE
Sln	0.019365518	-0.03030303	0.11389596	3.313868e-01	6.520804e-01				FALSE
Arpp21	0.040728821	-0.03030303	0.11220479	2.633487e-01	5.951245e-01				FALSE
Fos	0.207651649	-0.03030303	0.11494127	1.921549e-02	9.494710e-02				FALSE
Th	-0.034013462	-0.03030303	0.09363670	5.158043e-01	7.221260e-01				FALSE
DAPI	0.010055363	-0.03030303	0.11332303	3.608694e-01	6.520804e-01				FALSE

## Sheet: mPOA_Excitatory-E-11FN7_3
gene	observed	expected	sd	p.value	p.adj	minPercentCells	X10.	X90.	FINAL
Htr2c	0.375223797	-0.01923077	0.10977362	0.0001632295	0.02742255	0.245283	0.034166	1.40146	FALSE
4732456N10Rik	-0.069077127	-0.01923077	0.10896919	0.6763209185	0.94441842				FALSE
Ace2	0.026916188	-0.01923077	0.10701833	0.3331592605	0.82309935				FALSE
Adora2a	-0.118118222	-0.01923077	0.10651848	0.8233894723	0.96532075				FALSE
Aldh1l1	0.090848933	-0.01923077	0.10911383	0.1565228241	0.64181298				FALSE
Amigo2	0.167640849	-0.01923077	0.10895918	0.0431670339	0.34533627				FALSE
Ano3	-0.186942407	-0.01923077	0.10795397	0.9398538249	0.98155670				FALSE
Aqp4	0.041584764	-0.01923077	0.10670412	0.2843573383	0.75828624				FALSE
Ar	-0.142197407	-0.01923077	0.10914235	0.8700574810	0.96774597				FALSE
Arhgap36	0.043491984	-0.01923077	0.10531499	0.2757303020	0.75454076				FALSE
Avpr1a	0.085792272	-0.01923077	0.10580635	0.1604532446	0.64181298				FALSE
Avpr2	-0.041627945	-0.01923077	0.10623348	0.5834899302	0.94441842				FALSE
Baiap2	-0.070628187	-0.01923077	0.10885083	0.6816016073	0.94441842				FALSE
Bdnf	0.109660470	-0.01923077	0.10913015	0.1187858391	0.52515845				FALSE
Bmp7	0.127241125	-0.01923077	0.10964954	0.0908042850	0.42913312				FALSE
Brs3	0.074640937	-0.01923077	0.09201834	0.1538307209	0.64181298				FALSE
Calcr	0.021313965	-0.01923077	0.08478051	0.3162426230	0.80498122				FALSE
Cbln1	0.145022309	-0.01923077	0.10883172	0.0656188645	0.42913312				FALSE
Cbln2	0.061299879	-0.01923077	0.10833305	0.2286313346	0.73865508				FALSE
Cckar	-0.052382005	-0.01923077	0.10892371	0.6195704375	0.94441842				FALSE
Cckbr	0.071856045	-0.01923077	0.10822886	0.2000023061	0.68572219				FALSE
Ccnd2	-0.025640002	-0.01923077	0.10969717	0.5232955869	0.94441842				FALSE
Cd24a	-0.001874486	-0.01923077	0.10950585	0.4370328292	0.87406566				FALSE
Cdkn1a	-0.080494759	-0.01923077	0.10871951	0.7134544763	0.94441842				FALSE
Cenpe	0.058549816	-0.01923077	0.10802096	0.2357468467	0.74389092				FALSE
Chat	0.016239759	-0.01923077	0.10664336	0.3697147739	0.83587039				FALSE
Coch	0.050497144	-0.01923077	0.10519605	0.2537172281	0.74779815				FALSE
Col25a1	-0.139058448	-0.01923077	0.10914986	0.8638600016	0.96774597				FALSE
Cplx3	0.193460932	-0.01923077	0.10535518	0.0217536823	0.22841366				FALSE
Cpne5	-0.078462178	-0.01923077	0.10984390	0.7051368084	0.94441842				FALSE
Creb3l1	-0.141632480	-0.01923077	0.10979108	0.8675448461	0.96774597				FALSE
Crhbp	-0.122538947	-0.01923077	0.10190414	0.8446556581	0.96532075				FALSE
Crhr1	0.128763898	-0.01923077	0.10996376	0.0891755373	0.42913312				FALSE
Crhr2	0.005669245	-0.01923077	0.10643790	0.4075160286	0.84532513				FALSE
Cspg5	-0.060823944	-0.01923077	0.10404861	0.6553287534	0.94441842				FALSE
Cxcl14	-0.024303509	-0.01923077	0.10922200	0.5185219356	0.94441842				FALSE
Cyp19a1	0.122133182	-0.01923077	0.10453102	0.0881294980	0.42913312				FALSE
Cyp26a1	-0.052886384	-0.01923077	0.09285016	0.6415004506	0.94441842				FALSE
Cyr61	-0.159064421	-0.01923077	0.10818436	0.9019165689	0.97129477				FALSE
Dgkk	0.213380093	-0.01923077	0.10950559	0.0168270602	0.21110621				FALSE
Ebf3	-0.066041718	-0.01923077	0.08775134	0.7031389345	0.94441842				FALSE
Egr2	0.211822191	-0.01923077	0.10622344	0.0148090732	0.21110621				FALSE
Ermn	-0.211600922	-0.01923077	0.10643614	0.9646481897	0.98218725				FALSE
Esr1	-0.020323720	-0.01923077	0.10536673	0.5041380858	0.94441842				FALSE
Etv1	0.003731615	-0.01923077	0.10832854	0.4160652824	0.85242643				FALSE
Fbxw13	0.039620623	-0.01923077	0.10617167	0.2896853768	0.75851322				FALSE
Fezf1	-0.208551582	-0.01923077	0.10643798	0.9623551909	0.98218725				FALSE
Fn1	0.031766696	-0.01923077	0.08681630	0.2784614711	0.75454076				FALSE
Fst	-0.127467560	-0.01923077	0.10926006	0.8390679659	0.96532075				FALSE
Gabra1	0.195018123	-0.01923077	0.10938756	0.0250785349	0.24783493				FALSE
Gabrg1	0.202690822	-0.01923077	0.10722201	0.0192383930	0.21547000				FALSE
Gad1	0.130611336	-0.01923077	0.10946459	0.0855209321	0.42913312				FALSE
Galr1	0.181854264	-0.01923077	0.10770641	0.0309526303	0.28889122				FALSE
Galr2	-0.103817272	-0.01923077	0.10941311	0.7802663009	0.96358395				FALSE
Gbx2	0.036616760	-0.01923077	0.10279908	0.2934723755	0.75851322				FALSE
Gda	-0.098847972	-0.01923077	0.10940905	0.7666020426	0.95399365				FALSE
Gem	-0.151353930	-0.01923077	0.09721882	0.9129312424	0.97689458				FALSE
Gjc3	-0.138276880	-0.01923077	0.10975377	0.8609650507	0.96774597				FALSE
Glra3	0.287997048	-0.01923077	0.10999376	0.0026099656	0.12645649				FALSE
Gpr165	0.020693891	-0.01923077	0.10873158	0.3567403275	0.83587039				FALSE
Greb1	-0.122972212	-0.01923077	0.10471624	0.8390817613	0.96532075				FALSE
Grpr	0.124121357	-0.01923077	0.10569962	0.0875143015	0.42913312				FALSE
Igf1r	0.282377430	-0.01923077	0.10829045	0.0026749156	0.12645649				FALSE
Igf2r	0.215644878	-0.01923077	0.10911341	0.0156757378	0.21110621				FALSE
Irs4	0.165676678	-0.01923077	0.10957117	0.0457482755	0.34935047				TRUE
Isl1	0.244722942	-0.01923077	0.10854481	0.0075130635	0.17000833				FALSE
Kiss1r	-0.121419714	-0.01923077	0.10865789	0.8265104601	0.96532075				FALSE
Klf4	-0.089880440	-0.01923077	0.09997726	0.7601102915	0.95297410				FALSE
Lepr	-0.077408081	-0.01923077	0.10642935	0.7076830024	0.94441842				FALSE
Lmod1	0.014698324	-0.01923077	0.10598089	0.3744297780	0.83587039				FALSE
Lpar1	-0.180279174	-0.01923077	0.10407673	0.9391166652	0.98155670				FALSE
Man1a	0.084557437	-0.01923077	0.10950245	0.1716114914	0.65143863				FALSE
Mc4r	-0.057522398	-0.01923077	0.10725268	0.6394625568	0.94441842				FALSE
Mki67	0.029183702	-0.01923077	0.10542325	0.3230312552	0.80998882				FALSE
Mlc1	-0.120126106	-0.01923077	0.10866699	0.8234211844	0.96532075				FALSE
Myh11	-0.104059964	-0.01923077	0.10450928	0.7915153899	0.96358395				FALSE
Ndnf	-0.084696670	-0.01923077	0.10076997	0.7420430451	0.94441842				FALSE
Ndrg1	-0.214033623	-0.01923077	0.10951886	0.9623567640	0.98218725				FALSE
Necab1	0.005006094	-0.01923077	0.10366191	0.4075674722	0.84532513				FALSE
Nos1	-0.069071589	-0.01923077	0.10884095	0.6764962678	0.94441842				FALSE
Npas1	-0.053552454	-0.01923077	0.10154786	0.6323128739	0.94441842				FALSE
Npy1r	0.016811513	-0.01923077	0.10954312	0.3710688918	0.83587039				FALSE
Npy2r	-0.150817684	-0.01923077	0.10777706	0.8889413998	0.96774597				FALSE
Ntng1	0.083520492	-0.01923077	0.10688935	0.1682041348	0.65143863				TRUE
Ntsr1	0.004519988	-0.01923077	0.09837066	0.4046064807	0.84532513				FALSE
Nup62cl	-0.076569385	-0.01923077	0.10731912	0.7034265910	0.94441842				FALSE
Omp	-0.079755897	-0.01923077	0.10984179	0.7091903479	0.94441842				FALSE
Onecut2	0.056017124	-0.01923077	0.10903609	0.2450596333	0.74779815				FALSE
Opalin	-0.221308235	-0.01923077	0.10601041	0.9716881259	0.98339521				FALSE
Oprd1	0.137814849	-0.01923077	0.10486497	0.0671187935	0.42913312				FALSE
Oprk1	0.129818303	-0.01923077	0.10893134	0.0856115088	0.42913312				FALSE
Oprl1	0.228693921	-0.01923077	0.10616082	0.0097620780	0.18222546				FALSE
Oxtr	-0.119209441	-0.01923077	0.10333072	0.8333679268	0.96532075				FALSE
Pak3	-0.045371958	-0.01923077	0.10808781	0.5955523472	0.94441842				FALSE
Pcdh11x	0.127879457	-0.01923077	0.10939029	0.0893417137	0.42913312				FALSE
Pdgfra	0.165676907	-0.01923077	0.10369788	0.0372818898	0.32965039				FALSE
Pgr	-0.036875943	-0.01923077	0.10831464	0.5647040272	0.94441842				FALSE
Plin3	0.112640510	-0.01923077	0.10757967	0.1101367578	0.50008041				FALSE
Pnoc	-0.001202927	-0.01923077	0.10965022	0.4347033036	0.87406566				FALSE
Pou3f2	-0.027304121	-0.01923077	0.10903253	0.5295128508	0.94441842				FALSE
Prlr	0.154718331	-0.01923077	0.10953068	0.0561283340	0.40998087				FALSE
Ramp3	-0.009550073	-0.01923077	0.09505047	0.4594386776	0.89187532				FALSE
Rgs2	0.021118333	-0.01923077	0.10957660	0.3563518517	0.83587039				FALSE
Rgs5	-0.034988737	-0.01923077	0.10073474	0.5621530821	0.94441842				FALSE
Rnd3	0.244436764	-0.01923077	0.10965243	0.0080956345	0.17000833				FALSE
Rxfp1	-0.061491351	-0.01923077	0.09752591	0.6676112770	0.94441842				FALSE
Scgn	-0.110974990	-0.01923077	0.10451101	0.8099854489	0.96532075				FALSE
Selplg	0.160962585	-0.01923077	0.10351975	0.0408710397	0.34331673				FALSE
Sema3c	-0.086029979	-0.01923077	0.10726675	0.7332720321	0.94441842				FALSE
Sema4d	-0.077201909	-0.01923077	0.10595151	0.7078614117	0.94441842				FALSE
Serpinb1b	-0.086830508	-0.01923077	0.10590137	0.7383696843	0.94441842				FALSE
Serpine1	0.049778760	-0.01923077	0.09730953	0.2391077973	0.74389092				FALSE
Sgk1	-0.040352847	-0.01923077	0.10811461	0.5774473608	0.94441842				FALSE
Slc15a3	-0.189653535	-0.01923077	0.10398591	0.9493832129	0.98218725				FALSE
Slc17a6	0.014226590	-0.01923077	0.10779103	0.3781318429	0.83587039				FALSE
Slc17a7	0.006340705	-0.01923077	0.10247362	0.4014707675	0.84532513				FALSE
Slc17a8	-0.078895236	-0.01923077	0.10170589	0.7212763215	0.94441842				FALSE
Slc18a2	-0.181871160	-0.01923077	0.10748659	0.9348757511	0.98155670				FALSE
Slco1a4	-0.052755531	-0.01923077	0.10553101	0.6246349715	0.94441842				FALSE
Sox4	-0.080195802	-0.01923077	0.10835785	0.7131554890	0.94441842				FALSE
Sox6	0.123919702	-0.01923077	0.10772919	0.0919570980	0.42913312				FALSE
Sox8	-0.026965569	-0.01923077	0.10816749	0.5285031174	0.94441842				FALSE
Sp9	-0.077516854	-0.01923077	0.10058765	0.7188591351	0.94441842				FALSE
Synpr	-0.083133424	-0.01923077	0.10182860	0.7348509910	0.94441842				FALSE
Syt2	-0.188553851	-0.01923077	0.10851780	0.9406585015	0.98155670				FALSE
Syt4	-0.043740870	-0.01923077	0.10262463	0.5943822815	0.94441842				FALSE
Sytl4	-0.093909709	-0.01923077	0.10772356	0.7559224420	0.95297410				FALSE
Tacr1	0.053258692	-0.01923077	0.10780146	0.2506534442	0.74779815				FALSE
Tacr3	0.012252060	-0.01923077	0.10946316	0.3868221878	0.84397568				FALSE
Tiparp	0.130426981	-0.01923077	0.10918708	0.0852413596	0.42913312				FALSE
Tmem108	-0.048255611	-0.01923077	0.10922671	0.6047765223	0.94441842				FALSE
Traf4	-0.075356374	-0.01923077	0.10997385	0.6950983004	0.94441842				FALSE
Trhr	0.063596160	-0.01923077	0.10794484	0.2214492260	0.72947980				FALSE
Ttn	-0.029441586	-0.01923077	0.10673952	0.5381051210	0.94441842				FALSE
Ttyh2	0.065645814	-0.01923077	0.10711613	0.2140698313	0.71927463				FALSE
Blank-1	-0.152735528	-0.01923077	0.10750154	0.8928608657	0.96774597				FALSE
Blank-2	-0.150751877	-0.01923077	0.10653707	0.8914935872	0.96774597				FALSE
Blank-3	0.012102445	-0.01923077	0.09196263	0.3666583859	0.83587039				FALSE
Blank-4	-0.020739065	-0.01923077	0.01037658	0.5577849983	0.94441842				FALSE
Blank-5	-0.046878304	-0.01923077	0.10887264	0.6002305245	0.94441842				FALSE
Oxt	-0.029334711	-0.01923077	0.09204159	0.5437064185	0.94441842				FALSE
Penk	-0.078371384	-0.01923077	0.06620777	0.8141404617	0.96532075				FALSE
Sst	-0.062137147	-0.01923077	0.08986097	0.6834880771	0.94441842				FALSE
Tac1	0.047987630	-0.01923077	0.10873490	0.2682263464	0.75454076				FALSE
Gal	0.060412564	-0.01923077	0.09305548	0.1960350240	0.68572219				FALSE
Cartpt	-0.043720631	-0.01923077	0.07672769	0.6252045860	0.94441842				FALSE
Npas4	0.012711624	-0.01923077	0.03457532	0.1777823446	0.65143863				FALSE
Vgf	-0.145909255	-0.01923077	0.10349908	0.8895158911	0.96774597				FALSE
Trh	0.048251407	-0.01923077	0.06726009	0.1578575999	0.64181298				FALSE
Nts	-0.009741772	-0.01923077	0.09911337	0.4618640054	0.89187532				FALSE
Scg2	0.135297844	-0.01923077	0.10717487	0.0746742761	0.42913312				FALSE
Avp	0.118541923	-0.01923077	0.10017809	0.0845226807	0.42913312				FALSE
Gnrh1	-0.274065692	-0.01923077	0.10856661	0.9905441769	0.99315255				FALSE
Vip	0.056492545	-0.01923077	0.08487476	0.1861490154	0.66538371				FALSE
Egr1	-0.068721072	-0.01923077	0.10342821	0.6838524866	0.94441842				FALSE
Tac2	0.258742920	-0.01923077	0.10646998	0.0045163032	0.12645649				FALSE
Cck	0.022505542	-0.01923077	0.10751649	0.3489394860	0.83587039				FALSE
Crh	0.273549509	-0.01923077	0.10675889	0.0030491927	0.12645649				FALSE
Ucn3	0.043531861	-0.01923077	0.10593900	0.2767775848	0.75454076				FALSE
Adcyap1	0.203800479	-0.01923077	0.10491399	0.0167579379	0.21110621				FALSE
Nnat	-0.103064621	-0.01923077	0.10554808	0.7864813612	0.96358395				FALSE
Sln	0.266122568	-0.01923077	0.10910763	0.0044569595	0.12645649				FALSE
Mbp	0.209858611	-0.01923077	0.10876750	0.0175921844	0.21110621				FALSE
Arpp21	-0.288714718	-0.01923077	0.10931666	0.9931525509	0.99315255				FALSE
Fos	-0.034429857	-0.01923077	0.09834582	0.5614109161	0.94441842				FALSE
Th	-0.009660530	-0.01923077	0.08586994	0.4556295963	0.89187532				FALSE
polyT	0.045447499	-0.01923077	0.10779218	0.2742439676	0.75454076				FALSE
DAPI	0.079784552	-0.01923077	0.10743916	0.1783700999	0.65143863				FALSE

## Sheet: mPOA_Excitatory-E-13FN7_9
gene	observed	expected	sd	p.value	p.adj	minPercentCells	X10.	X90.	FINAL
Amigo2	0.2312127086	-0.02040816	0.09680378	4.670871e-03	4.341358e-02	0.16	0.00000000	0.82313900	FALSE
Arhgap36	0.2855176866	-0.02040816	0.09430425	5.892558e-04	9.574826e-03	0.14	0.00000000	1.01353000	FALSE
Cbln1	0.2628841713	-0.02040816	0.09590429	1.568893e-03	1.882672e-02	0.18	0.31091500	1.44072000	FALSE
Cpne5	0.2892241581	-0.02040816	0.09671917	6.839161e-04	9.574826e-03	0.26	0.00000000	0.70787700	FALSE
Fezf1	0.4278360901	-0.02040816	0.09584830	1.458346e-06	8.166740e-05	0.22	0.27522100	1.21778000	FALSE
Gda	0.2238848081	-0.02040816	0.09322837	4.391700e-03	4.340033e-02	0.12	0.00000000	0.62700600	TRUE
Glra3	0.3978499429	-0.02040816	0.09644080	7.223947e-06	3.034058e-04	0.26	0.00000000	1.01598000	TRUE
Ndrg1	0.2836797931	-0.02040816	0.09682432	8.429659e-04	1.089371e-02	0.20	0.00000000	0.97368000	FALSE
Necab1	0.3763482955	-0.02040816	0.09468392	1.392772e-05	4.679712e-04	0.12	0.00000000	0.85908400	TRUE
Nos1	0.2876230626	-0.02040816	0.09583529	6.541037e-04	9.574826e-03	0.18	0.42940900	1.68930000	FALSE
Npas1	0.2400507453	-0.02040816	0.09603932	3.343901e-03	3.511096e-02	0.14	0.00000000	1.05978000	FALSE
Ramp3	0.2223613659	-0.02040816	0.09401971	4.909869e-03	4.341358e-02	0.12	0.00000000	0.23302900	FALSE
Rnd3	0.2270871928	-0.02040816	0.09675608	5.264853e-03	4.422477e-02	0.16	0.00000000	0.89087500	FALSE
Syt2	0.3313470567	-0.02040816	0.09675831	1.387744e-04	2.914263e-03	0.18	0.00000000	1.37449000	TRUE
Tac1	0.2223861817	-0.02040816	0.09680233	6.068332e-03	4.854666e-02	0.16	-0.00462664	0.19691500	FALSE
Nts	0.3388817228	-0.02040816	0.09453885	7.221762e-05	1.733223e-03	0.22	-0.04100780	0.00613195	FALSE
Vip	0.4474710036	-0.02040816	0.09549418	4.802654e-07	4.034229e-05	0.26	-0.03224720	0.00769627	FALSE
Tac2	0.5176852080	-0.02040816	0.09539322	8.463470e-09	1.421863e-06	0.28	-0.04790360	0.00277125	FALSE
Crh	0.2483476468	-0.02040816	0.09522122	2.383016e-03	2.668978e-02	0.24	-0.03369740	0.01065940	FALSE
Mbp	0.3115553864	-0.02040816	0.09248485	1.657307e-04	3.093640e-03	0.12	-0.04388230	0.05706470	FALSE
Arpp21	0.3378847595	-0.02040816	0.09425120	7.192061e-05	1.733223e-03	0.24	-0.00678985	0.07308190	FALSE
4732456N10Rik	0.1170964717	-0.02040816	0.09183719	6.716212e-02	2.564372e-01				FALSE
Ace2	0.0798473687	-0.02040816	0.09355698	1.419502e-01	3.974605e-01				FALSE
Adora2a	-0.1371486475	-0.02040816	0.09248312	8.965777e-01	9.355594e-01				FALSE
Aldh1l1	-0.1074505734	-0.02040816	0.09612753	8.173968e-01	9.161109e-01				FALSE
Ano3	0.0897610019	-0.02040816	0.09258902	1.170482e-01	3.512744e-01				FALSE
Aqp4	-0.0647236580	-0.02040816	0.09460138	6.802666e-01	8.768813e-01				FALSE
Ar	-0.0035676541	-0.02040816	0.09605419	4.304129e-01	6.921502e-01				FALSE
Avpr1a	0.0404399364	-0.02040816	0.09611462	2.633412e-01	5.196106e-01				FALSE
Avpr2	-0.1872491624	-0.02040816	0.09397079	9.620887e-01	9.718605e-01				FALSE
Baiap2	0.0621280939	-0.02040816	0.09578974	1.944429e-01	4.537000e-01				FALSE
Bdnf	-0.0384881616	-0.02040816	0.09620188	5.745374e-01	7.977048e-01				FALSE
Bmp7	-0.1101256336	-0.02040816	0.09171457	8.360184e-01	9.161109e-01				FALSE
Brs3	-0.0619156947	-0.02040816	0.09354018	6.713848e-01	8.768813e-01				FALSE
Calcr	-0.1231121000	-0.02040816	0.08845221	8.772041e-01	9.210644e-01				FALSE
Cbln2	-0.0406755458	-0.02040816	0.09474209	5.846959e-01	8.051550e-01				FALSE
Cckar	0.0368052318	-0.02040816	0.09646515	2.765574e-01	5.340419e-01				FALSE
Cckbr	0.1171109749	-0.02040816	0.09668450	7.746243e-02	2.829063e-01				FALSE
Ccnd2	0.1400590183	-0.02040816	0.09209589	4.071990e-02	2.012042e-01				FALSE
Cd24a	0.1094950899	-0.02040816	0.09542402	8.670525e-02	2.975431e-01				FALSE
Cdkn1a	0.1304792430	-0.02040816	0.09520220	5.649281e-02	2.314827e-01				FALSE
Cenpe	-0.0339248939	-0.02040816	0.09384055	5.572653e-01	7.905224e-01				FALSE
Chat	0.0925642930	-0.02040816	0.09496255	1.170915e-01	3.512744e-01				FALSE
Coch	0.1415123493	-0.02040816	0.09292189	4.070662e-02	2.012042e-01				FALSE
Col25a1	-0.0010792592	-0.02040816	0.09552963	4.198278e-01	6.892353e-01				FALSE
Cplx3	0.0243221742	-0.02040816	0.09586637	3.203964e-01	5.850718e-01				FALSE
Creb3l1	0.0682472403	-0.02040816	0.09730739	1.811250e-01	4.501141e-01				FALSE
Crhbp	0.0365216171	-0.02040816	0.08602436	2.540539e-01	5.149362e-01				FALSE
Crhr1	0.0065113470	-0.02040816	0.09072605	3.833432e-01	6.511602e-01				FALSE
Crhr2	0.0462923994	-0.02040816	0.09390638	2.387628e-01	5.142584e-01				FALSE
Cspg5	-0.0367231293	-0.02040816	0.09109153	5.710724e-01	7.977048e-01				FALSE
Cxcl14	-0.0589291814	-0.02040816	0.09635934	6.553349e-01	8.668997e-01				FALSE
Cyp19a1	-0.0569808819	-0.02040816	0.09465708	6.503889e-01	8.668997e-01				FALSE
Cyp26a1	-0.0699024581	-0.02040816	0.08915882	7.105954e-01	8.842965e-01				FALSE
Cyr61	0.0006889793	-0.02040816	0.09540720	4.124966e-01	6.861330e-01				FALSE
Dgkk	0.1114276742	-0.02040816	0.09687886	8.678341e-02	2.975431e-01				FALSE
Ebf3	-0.1039929789	-0.02040816	0.08477705	8.379179e-01	9.161109e-01				FALSE
Egr2	-0.1147606488	-0.02040816	0.09602872	8.370842e-01	9.161109e-01				FALSE
Ermn	0.0149056338	-0.02040816	0.09471643	3.546349e-01	6.257755e-01				FALSE
Esr1	0.0435553027	-0.02040816	0.09402376	2.481603e-01	5.149362e-01				FALSE
Etv1	-0.0628295101	-0.02040816	0.09355799	6.748779e-01	8.768813e-01				FALSE
Fbxw13	-0.0049011137	-0.02040816	0.09420810	4.346278e-01	6.921502e-01				FALSE
Fn1	0.1246158663	-0.02040816	0.09653056	6.650157e-02	2.564372e-01				FALSE
Fst	0.0442663358	-0.02040816	0.09598450	2.502188e-01	5.149362e-01				FALSE
Gabra1	-0.0674104576	-0.02040816	0.09534786	6.889781e-01	8.768813e-01				FALSE
Gabrg1	0.1589114431	-0.02040816	0.09270527	2.653825e-02	1.592295e-01				FALSE
Gad1	0.0142167978	-0.02040816	0.09488401	3.575860e-01	6.257755e-01				FALSE
Galr1	0.0746846132	-0.02040816	0.09699182	1.634393e-01	4.224277e-01				FALSE
Galr2	-0.0081069891	-0.02040816	0.09518412	4.485856e-01	6.921502e-01				FALSE
Gbx2	0.0403560073	-0.02040816	0.08028428	2.245661e-01	4.899624e-01				FALSE
Gem	0.0577177412	-0.02040816	0.09357764	2.018932e-01	4.603901e-01				FALSE
Gjc3	-0.0904761890	-0.02040816	0.09237980	7.759175e-01	9.161109e-01				FALSE
Gpr165	0.1151795402	-0.02040816	0.09381048	7.418171e-02	2.769450e-01				FALSE
Greb1	0.1009937522	-0.02040816	0.09009248	8.890551e-02	2.987225e-01				FALSE
Grpr	-0.0994261670	-0.02040816	0.09530182	7.964858e-01	9.161109e-01				FALSE
Htr2c	-0.0485782906	-0.02040816	0.09580067	6.156399e-01	8.408740e-01				FALSE
Igf1r	0.0569049005	-0.02040816	0.09643426	2.113581e-01	4.687706e-01				FALSE
Igf2r	0.0082218885	-0.02040816	0.09681255	3.837194e-01	6.511602e-01				FALSE
Irs4	0.1801926531	-0.02040816	0.09659344	1.891213e-02	1.270895e-01				TRUE
Isl1	-0.1126871997	-0.02040816	0.08713744	8.552014e-01	9.161109e-01				FALSE
Kiss1r	-0.0721726094	-0.02040816	0.09357083	7.099407e-01	8.842965e-01				FALSE
Klf4	0.0625336444	-0.02040816	0.09197341	1.835810e-01	4.501141e-01				FALSE
Lepr	-0.0265785411	-0.02040816	0.09115832	5.269832e-01	7.643984e-01				FALSE
Lmod1	-0.0120261562	-0.02040816	0.09217241	4.637708e-01	7.019234e-01				FALSE
Lpar1	0.1483983068	-0.02040816	0.09487057	3.759248e-02	1.973605e-01				FALSE
Man1a	0.0749078033	-0.02040816	0.09679385	1.623780e-01	4.224277e-01				FALSE
Mc4r	-0.1525420169	-0.02040816	0.09705790	9.133051e-01	9.413206e-01				FALSE
Mki67	-0.1190086266	-0.02040816	0.09441716	8.518282e-01	9.161109e-01				FALSE
Mlc1	-0.1050199007	-0.02040816	0.09625533	8.103087e-01	9.161109e-01				FALSE
Myh11	0.0809818694	-0.02040816	0.09234103	1.361032e-01	3.875482e-01				FALSE
Ndnf	-0.0270077804	-0.02040816	0.09463450	5.277989e-01	7.643984e-01				FALSE
Npy1r	0.0345043722	-0.02040816	0.09683418	2.853306e-01	5.430993e-01				FALSE
Npy2r	0.1557088964	-0.02040816	0.09494381	3.180091e-02	1.780851e-01				FALSE
Ntng1	-0.0229031921	-0.02040816	0.09650319	5.103133e-01	7.643984e-01				FALSE
Ntsr1	0.1284023531	-0.02040816	0.09231619	5.348473e-02	2.304781e-01				FALSE
Nup62cl	0.0604284723	-0.02040816	0.09274623	1.917162e-01	4.536383e-01				FALSE
Omp	-0.1197381543	-0.02040816	0.09136585	8.615186e-01	9.161109e-01				FALSE
Onecut2	0.0217937866	-0.02040816	0.09623353	3.304986e-01	5.970297e-01				FALSE
Opalin	0.0254574560	-0.02040816	0.09580414	3.160605e-01	5.834963e-01				FALSE
Oprd1	0.1029198786	-0.02040816	0.09442783	9.576674e-02	3.154669e-01				FALSE
Oprk1	-0.1164065088	-0.02040816	0.09422201	8.458635e-01	9.161109e-01				FALSE
Oprl1	-0.1200896018	-0.02040816	0.09274034	8.587778e-01	9.161109e-01				FALSE
Oxtr	0.1939859254	-0.02040816	0.08849963	7.706167e-03	5.884710e-02				FALSE
Pak3	0.0597094569	-0.02040816	0.09633065	2.027909e-01	4.603901e-01				FALSE
Pcdh11x	-0.1264777920	-0.02040816	0.09534541	8.670336e-01	9.161109e-01				FALSE
Pdgfra	0.0947590154	-0.02040816	0.09246547	1.064712e-01	3.312436e-01				FALSE
Pgr	-0.0255476117	-0.02040816	0.09661300	5.212122e-01	7.643984e-01				FALSE
Plin3	-0.1126555247	-0.02040816	0.09159239	8.430689e-01	9.161109e-01				FALSE
Pnoc	-0.0714278730	-0.02040816	0.09703984	7.004727e-01	8.842965e-01				FALSE
Pou3f2	-0.1710925690	-0.02040816	0.09548211	9.427336e-01	9.657271e-01				FALSE
Prlr	0.0922992871	-0.02040816	0.09696966	1.225576e-01	3.612224e-01				FALSE
Rgs2	0.1640979334	-0.02040816	0.09700292	2.858117e-02	1.655737e-01				FALSE
Rgs5	-0.1133520836	-0.02040816	0.09181840	8.442927e-01	9.161109e-01				FALSE
Rxfp1	-0.0060173205	-0.02040816	0.09545188	4.400804e-01	6.921502e-01				FALSE
Scgn	0.1205375710	-0.02040816	0.08744672	5.350384e-02	2.304781e-01				FALSE
Selplg	-0.0576633525	-0.02040816	0.09558148	6.516482e-01	8.668997e-01				FALSE
Sema3c	-0.0015201747	-0.02040816	0.09669727	4.225669e-01	6.892353e-01				FALSE
Sema4d	-0.0347866103	-0.02040816	0.09531558	5.599534e-01	7.905224e-01				FALSE
Serpinb1b	0.1964093739	-0.02040816	0.09055812	8.327510e-03	6.082703e-02				FALSE
Serpine1	0.1522533158	-0.02040816	0.09522252	3.489724e-02	1.891205e-01				FALSE
Sgk1	0.0748436490	-0.02040816	0.09566597	1.597051e-01	4.224277e-01				FALSE
Slc15a3	-0.0070079476	-0.02040816	0.09439747	4.435577e-01	6.921502e-01				FALSE
Slc17a6	0.0325492946	-0.02040816	0.09455381	2.877133e-01	5.430993e-01				FALSE
Slc17a7	-0.0886914839	-0.02040816	0.08096248	8.004961e-01	9.161109e-01				FALSE
Slc17a8	0.1017583104	-0.02040816	0.08684924	7.976562e-02	2.851197e-01				FALSE
Slc18a2	-0.0985811959	-0.02040816	0.09541967	7.936795e-01	9.161109e-01				FALSE
Slco1a4	0.0234018837	-0.02040816	0.08227236	2.971898e-01	5.547543e-01				FALSE
Sox4	0.1789186338	-0.02040816	0.09673331	1.967152e-02	1.271083e-01				FALSE
Sox6	-0.1141148584	-0.02040816	0.09427490	8.398820e-01	9.161109e-01				FALSE
Sox8	0.0160039145	-0.02040816	0.09519972	3.510523e-01	6.257755e-01				FALSE
Sp9	0.0010384195	-0.02040816	0.09269096	4.085109e-01	6.861330e-01				FALSE
Synpr	0.0400823743	-0.02040816	0.09269293	2.570101e-01	5.149362e-01				FALSE
Syt4	-0.1428778348	-0.02040816	0.09300566	9.060468e-01	9.396041e-01				FALSE
Sytl4	-0.0675164511	-0.02040816	0.09653824	6.872164e-01	8.768813e-01				FALSE
Tacr1	-0.0926399708	-0.02040816	0.09096128	7.864296e-01	9.161109e-01				FALSE
Tacr3	0.1002073726	-0.02040816	0.09525755	1.027199e-01	3.312436e-01				FALSE
Tiparp	0.0647136018	-0.02040816	0.09596917	1.875475e-01	4.501141e-01				FALSE
Tmem108	0.0422529143	-0.02040816	0.09622831	2.574681e-01	5.149362e-01				FALSE
Traf4	0.0566478507	-0.02040816	0.09640630	2.120629e-01	4.687706e-01				FALSE
Trhr	0.1226741195	-0.02040816	0.09433313	6.466155e-02	2.564372e-01				FALSE
Ttn	-0.0899912794	-0.02040816	0.08345166	7.978069e-01	9.161109e-01				FALSE
Ttyh2	-0.1836185204	-0.02040816	0.09390036	9.589054e-01	9.718605e-01				FALSE
Blank-1	-0.2030525655	-0.02040816	0.09504125	9.726806e-01	9.726806e-01				FALSE
Blank-2	-0.1156830842	-0.02040816	0.09429745	8.438400e-01	9.161109e-01				FALSE
Blank-3	-0.1095097033	-0.02040816	0.08735692	8.461289e-01	9.161109e-01				FALSE
Blank-4	-0.0123363167	-0.02040816	0.08399374	4.617203e-01	7.019234e-01				FALSE
Blank-5	0.0707673859	-0.02040816	0.09731844	1.744105e-01	4.439541e-01				FALSE
Oxt	-0.0937217600	-0.02040816	0.09657555	7.761132e-01	9.161109e-01				FALSE
Penk	-0.1783271637	-0.02040816	0.08648310	9.660756e-01	9.718605e-01				FALSE
Sst	-0.0555005166	-0.02040816	0.09600307	6.426435e-01	8.668997e-01				FALSE
Gal	0.1319149233	-0.02040816	0.07300881	1.847275e-02	1.270895e-01				FALSE
Cartpt	-0.0081191336	-0.02040816	0.09600647	4.490737e-01	6.921502e-01				FALSE
Npas4	-0.0233018485	-0.02040816	0.05882052	5.196181e-01	7.643984e-01				FALSE
Vgf	0.0085943142	-0.02040816	0.09103213	3.750164e-01	6.495130e-01				FALSE
Trh	0.0770409749	-0.02040816	0.09307991	1.475635e-01	4.064043e-01				FALSE
Scg2	0.1381352517	-0.02040816	0.09415134	4.609848e-02	2.158392e-01				FALSE
Avp	0.1381172793	-0.02040816	0.09542816	4.833644e-02	2.194736e-01				FALSE
Gnrh1	0.0649833374	-0.02040816	0.09614287	1.872239e-01	4.501141e-01				FALSE
Egr1	-0.0829632964	-0.02040816	0.05704379	8.635953e-01	9.161109e-01				FALSE
Cck	0.0439879971	-0.02040816	0.09422584	2.471696e-01	5.149362e-01				FALSE
Ucn3	-0.0310851702	-0.02040816	0.09632011	5.441320e-01	7.813178e-01				FALSE
Adcyap1	0.1661241577	-0.02040816	0.09632535	2.640434e-02	1.592295e-01				FALSE
Nnat	0.1002033586	-0.02040816	0.09607323	1.046646e-01	3.312436e-01				FALSE
Sln	0.0397480163	-0.02040816	0.09625253	2.659911e-01	5.196106e-01				FALSE
Fos	0.0788177629	-0.02040816	0.09627729	1.513580e-01	4.101314e-01				FALSE
Th	0.1224908798	-0.02040816	0.08941905	5.501229e-02	2.310516e-01				FALSE
polyT	0.0856611163	-0.02040816	0.09402003	1.296270e-01	3.754713e-01				FALSE
DAPI	0.1408530828	-0.02040816	0.09585520	4.625125e-02	2.158392e-01				FALSE

## Sheet: mPOA_Excitatory-E-12FN7_9
gene	observed	expected	sd	p.value	p.adj	minPercentCells	X10.	X90.	FINAL
Arhgap36	1.297703e-01	-0.005747126	0.04885719	2.770754e-03	3.324905e-02	0.10285714	0.0000000	1.23880000	FALSE
Baiap2	1.214920e-01	-0.005747126	0.04890729	4.638978e-03	4.870927e-02	0.08000000	0.0000000	0.92929600	FALSE
Fezf1	1.460886e-01	-0.005747126	0.04742668	6.836103e-04	1.435582e-02	0.05142857	0.0000000	0.24378800	FALSE
Gabra1	1.222636e-01	-0.005747126	0.04892713	4.443719e-03	4.870927e-02	0.10285714	0.2443400	1.18798000	FALSE
Gad1	1.415747e-01	-0.005747126	0.04901747	1.325736e-03	1.962865e-02	0.13714286	0.0000000	1.37142000	FALSE
Gpr165	1.802995e-01	-0.005747126	0.04885398	6.998565e-05	2.351518e-03	0.14857143	0.7223180	1.54590000	FALSE
Isl1	1.447410e-01	-0.005747126	0.04774035	8.101699e-04	1.512317e-02	0.07428571	0.0000000	0.20395400	FALSE
Pak3	1.571852e-01	-0.005747126	0.04879350	4.200671e-04	1.008161e-02	0.09714286	0.9684440	1.39954000	FALSE
Pcdh11x	1.427685e-01	-0.005747126	0.04900030	1.219079e-03	1.962865e-02	0.17714286	0.0000000	0.99254000	FALSE
Sema4d	1.324038e-01	-0.005747126	0.04855789	2.220033e-03	2.868965e-02	0.10285714	0.4593900	1.00142000	FALSE
Trh	2.535018e-01	-0.005747126	0.04332347	1.088421e-09	8.581003e-08	0.04000000	-0.0488200	-0.01482280	FALSE
Nts	4.196713e-01	-0.005747126	0.04510010	0.000000e+00	0.000000e+00	0.03428571	-0.0429586	0.02693300	FALSE
Avp	2.841183e-01	-0.005747126	0.04889687	1.532322e-09	8.581003e-08	0.18285714	-0.0265544	0.04300800	FALSE
Sln	1.851473e-01	-0.005747126	0.04886141	4.675282e-05	1.963619e-03	0.14285714	-0.0535222	0.16724200	FALSE
Mbp	1.331922e-01	-0.005747126	0.04649231	1.402046e-03	1.962865e-02	0.08571429	-0.0655906	-0.00637756	FALSE
Arpp21	1.595498e-01	-0.005747126	0.04887887	3.601058e-04	1.008161e-02	0.13142857	-0.0153854	0.08257300	FALSE
4732456N10Rik	6.297104e-02	-0.005747126	0.04816655	7.683632e-02	3.488784e-01				FALSE
Ace2	-2.286670e-03	-0.005747126	0.04792732	4.712205e-01	7.832817e-01				FALSE
Adora2a	3.421608e-02	-0.005747126	0.04840640	2.045220e-01	5.360466e-01				FALSE
Aldh1l1	-4.824232e-03	-0.005747126	0.04875213	4.924483e-01	7.832817e-01				FALSE
Amigo2	-8.412750e-02	-0.005747126	0.04891852	9.454513e-01	9.685111e-01				FALSE
Ano3	5.403339e-02	-0.005747126	0.04834271	1.081181e-01	4.062807e-01				FALSE
Aqp4	3.401550e-02	-0.005747126	0.04871926	2.072048e-01	5.360466e-01				FALSE
Ar	-3.681812e-04	-0.005747126	0.04887436	4.561823e-01	7.832817e-01				FALSE
Avpr1a	2.566726e-02	-0.005747126	0.04871590	2.595126e-01	5.813082e-01				FALSE
Avpr2	-7.241376e-02	-0.005747126	0.04746978	9.199004e-01	9.598960e-01				FALSE
Bdnf	9.686950e-02	-0.005747126	0.04872525	1.760106e-02	1.232074e-01				FALSE
Bmp7	3.000543e-02	-0.005747126	0.04887540	2.322356e-01	5.573654e-01				FALSE
Brs3	7.487094e-02	-0.005747126	0.04902996	5.006112e-02	2.548566e-01				FALSE
Calcr	3.280952e-02	-0.005747126	0.04907642	2.160377e-01	5.360466e-01				FALSE
Cbln1	1.440011e-02	-0.005747126	0.04862740	3.393204e-01	6.786408e-01				FALSE
Cbln2	5.881405e-02	-0.005747126	0.04868235	9.239135e-02	3.880437e-01				FALSE
Cckar	3.469183e-02	-0.005747126	0.04897160	2.044692e-01	5.360466e-01				FALSE
Cckbr	7.756228e-02	-0.005747126	0.04897689	4.447204e-02	2.410098e-01				FALSE
Ccnd2	-9.045827e-03	-0.005747126	0.04897530	5.268502e-01	7.832817e-01				FALSE
Cd24a	-1.339690e-03	-0.005747126	0.04894083	4.641212e-01	7.832817e-01				FALSE
Cdkn1a	-3.129216e-02	-0.005747126	0.04880558	6.996534e-01	8.426047e-01				FALSE
Cenpe	9.768497e-02	-0.005747126	0.04847054	1.642479e-02	1.199724e-01				FALSE
Chat	-8.721004e-02	-0.005747126	0.04764474	9.563485e-01	9.702165e-01				FALSE
Coch	2.778566e-02	-0.005747126	0.04867706	2.454485e-01	5.656346e-01				FALSE
Col25a1	6.355994e-03	-0.005747126	0.04896413	4.023832e-01	7.511152e-01				FALSE
Cplx3	-4.425015e-02	-0.005747126	0.04853585	7.861957e-01	8.985093e-01				FALSE
Cpne5	-3.074221e-02	-0.005747126	0.04904642	6.948415e-01	8.426047e-01				FALSE
Creb3l1	-4.662427e-02	-0.005747126	0.04893637	7.982290e-01	9.060978e-01				FALSE
Crhbp	-4.372847e-02	-0.005747126	0.04823206	7.844969e-01	8.985093e-01				FALSE
Crhr1	-5.335356e-02	-0.005747126	0.04892278	8.347465e-01	9.257420e-01				FALSE
Crhr2	-3.311830e-02	-0.005747126	0.04832355	7.144441e-01	8.452578e-01				FALSE
Cspg5	4.074266e-02	-0.005747126	0.04776431	1.651980e-01	5.141659e-01				FALSE
Cxcl14	-3.236714e-02	-0.005747126	0.04887625	7.069998e-01	8.426047e-01				FALSE
Cyp19a1	-1.476602e-02	-0.005747126	0.04781189	5.748097e-01	8.137662e-01				FALSE
Cyp26a1	3.602651e-02	-0.005747126	0.04815903	1.928586e-01	5.360466e-01				FALSE
Cyr61	7.121469e-02	-0.005747126	0.04854430	5.643846e-02	2.788724e-01				FALSE
Dgkk	3.320188e-02	-0.005747126	0.04897722	2.132348e-01	5.360466e-01				FALSE
Ebf3	9.122374e-03	-0.005747126	0.03702872	3.440015e-01	6.799088e-01				FALSE
Egr2	-7.011756e-03	-0.005747126	0.04878226	5.103410e-01	7.832817e-01				FALSE
Ermn	5.174181e-03	-0.005747126	0.04863479	4.111618e-01	7.590679e-01				FALSE
Esr1	-5.752607e-02	-0.005747126	0.04900611	8.546487e-01	9.384377e-01				FALSE
Etv1	-1.864648e-02	-0.005747126	0.04850957	6.048471e-01	8.194703e-01				FALSE
Fbxw13	3.964899e-02	-0.005747126	0.04687698	1.664200e-01	5.141659e-01				FALSE
Fn1	4.850141e-02	-0.005747126	0.04723401	1.253799e-01	4.359265e-01				FALSE
Fst	-1.630140e-02	-0.005747126	0.04888401	5.854689e-01	8.137662e-01				FALSE
Gabrg1	1.207477e-02	-0.005747126	0.04900581	3.580526e-01	6.914119e-01				FALSE
Galr1	5.745617e-02	-0.005747126	0.04900472	9.857065e-02	3.942826e-01				FALSE
Galr2	-6.011308e-03	-0.005747126	0.04881525	5.021590e-01	7.832817e-01				FALSE
Gbx2	3.126508e-02	-0.005747126	0.04606091	2.108287e-01	5.360466e-01				FALSE
Gda	4.050109e-02	-0.005747126	0.04900093	1.726300e-01	5.178899e-01				FALSE
Gem	1.125873e-01	-0.005747126	0.04838482	7.228690e-03	6.746778e-02				FALSE
Gjc3	2.743012e-03	-0.005747126	0.04891976	4.311087e-01	7.787769e-01				FALSE
Glra3	-3.722140e-02	-0.005747126	0.04890253	7.400866e-01	8.634343e-01				FALSE
Greb1	-1.807612e-02	-0.005747126	0.04829310	6.007524e-01	8.194703e-01				FALSE
Grpr	7.746705e-02	-0.005747126	0.04861142	4.346458e-02	2.410098e-01				FALSE
Htr2c	-5.908553e-02	-0.005747126	0.04890883	8.622685e-01	9.406565e-01				FALSE
Igf1r	-1.060770e-02	-0.005747126	0.04883114	5.396446e-01	7.934433e-01				FALSE
Igf2r	-2.634374e-02	-0.005747126	0.04894375	6.630575e-01	8.426047e-01				FALSE
Irs4	1.052788e-01	-0.005747126	0.04878007	1.142150e-02	9.137200e-02				FALSE
Kiss1r	-6.269491e-02	-0.005747126	0.04890636	8.778741e-01	9.451961e-01				FALSE
Klf4	1.889730e-02	-0.005747126	0.04826954	3.048301e-01	6.565571e-01				FALSE
Lepr	2.620667e-02	-0.005747126	0.04718716	2.491486e-01	5.656346e-01				FALSE
Lmod1	-7.426713e-03	-0.005747126	0.04762358	5.140670e-01	7.832817e-01				FALSE
Lpar1	-9.142885e-02	-0.005747126	0.04879179	9.604616e-01	9.702165e-01				FALSE
Man1a	2.323164e-02	-0.005747126	0.04905563	2.773497e-01	6.130889e-01				FALSE
Mc4r	4.765383e-02	-0.005747126	0.04904352	1.381104e-01	4.625734e-01				FALSE
Mki67	-9.332786e-02	-0.005747126	0.04852850	9.644414e-01	9.702165e-01				FALSE
Mlc1	-7.121217e-02	-0.005747126	0.04895786	9.094166e-01	9.598960e-01				FALSE
Myh11	-2.853431e-03	-0.005747126	0.04862635	4.762734e-01	7.832817e-01				FALSE
Ndnf	-1.097856e-02	-0.005747126	0.04829411	5.431308e-01	7.934433e-01				FALSE
Ndrg1	-2.856708e-02	-0.005747126	0.04896248	6.794174e-01	8.426047e-01				FALSE
Necab1	1.691307e-02	-0.005747126	0.04896862	3.217720e-01	6.686417e-01				FALSE
Nos1	1.159271e-01	-0.005747126	0.04900096	6.512234e-03	6.435620e-02				FALSE
Npas1	1.207678e-02	-0.005747126	0.04867540	3.571158e-01	6.914119e-01				FALSE
Npy1r	-8.583372e-03	-0.005747126	0.04891554	5.231187e-01	7.832817e-01				FALSE
Npy2r	1.801209e-02	-0.005747126	0.04889881	3.135242e-01	6.667351e-01				FALSE
Ntng1	-3.547716e-02	-0.005747126	0.04899625	7.280021e-01	8.552753e-01				FALSE
Ntsr1	-3.247147e-02	-0.005747126	0.04901906	7.071861e-01	8.426047e-01				FALSE
Nup62cl	3.920254e-02	-0.005747126	0.04853268	1.771780e-01	5.222089e-01				FALSE
Omp	-1.347172e-02	-0.005747126	0.04880306	5.628823e-01	8.137662e-01				FALSE
Onecut2	6.685298e-02	-0.005747126	0.04876243	6.826302e-02	3.276625e-01				FALSE
Opalin	1.024639e-02	-0.005747126	0.04832817	3.703465e-01	7.059636e-01				FALSE
Oprd1	-7.077041e-04	-0.005747126	0.04894832	4.589998e-01	7.832817e-01				FALSE
Oprk1	-6.093409e-02	-0.005747126	0.04871201	8.713767e-01	9.444600e-01				FALSE
Oprl1	1.432939e-02	-0.005747126	0.04809943	3.381943e-01	6.786408e-01				FALSE
Oxtr	9.840846e-03	-0.005747126	0.04851575	3.739926e-01	7.059636e-01				FALSE
Pdgfra	-2.867225e-02	-0.005747126	0.04827312	6.825725e-01	8.426047e-01				FALSE
Pgr	-3.935178e-02	-0.005747126	0.04889840	7.540324e-01	8.736376e-01				FALSE
Plin3	-9.686873e-02	-0.005747126	0.04781427	9.716581e-01	9.716581e-01				FALSE
Pnoc	-7.725603e-02	-0.005747126	0.04890213	9.281686e-01	9.603964e-01				FALSE
Pou3f2	-8.242625e-04	-0.005747126	0.04844273	4.595282e-01	7.832817e-01				FALSE
Prlr	9.404139e-02	-0.005747126	0.04883272	2.050265e-02	1.377778e-01				FALSE
Ramp3	-2.662485e-02	-0.005747126	0.04881039	6.655765e-01	8.426047e-01				FALSE
Rgs2	2.866180e-02	-0.005747126	0.04903457	2.414244e-01	5.656346e-01				FALSE
Rgs5	-2.486593e-02	-0.005747126	0.04736902	6.567517e-01	8.426047e-01				FALSE
Rnd3	-4.654652e-03	-0.005747126	0.04900418	4.911069e-01	7.832817e-01				FALSE
Rxfp1	1.232663e-03	-0.005747126	0.04855191	4.428453e-01	7.832817e-01				FALSE
Scgn	-8.200306e-03	-0.005747126	0.04851852	5.201626e-01	7.832817e-01				FALSE
Selplg	-8.351033e-03	-0.005747126	0.04872648	5.213090e-01	7.832817e-01				FALSE
Sema3c	7.795916e-02	-0.005747126	0.04730113	3.839302e-02	2.224147e-01				FALSE
Serpinb1b	-6.088820e-03	-0.005747126	0.04773107	5.028559e-01	7.832817e-01				FALSE
Serpine1	8.674028e-02	-0.005747126	0.04869939	2.877242e-02	1.859141e-01				FALSE
Sgk1	-2.784574e-02	-0.005747126	0.04888743	6.743766e-01	8.426047e-01				FALSE
Slc15a3	1.497732e-02	-0.005747126	0.04808707	3.332423e-01	6.786408e-01				FALSE
Slc17a6	8.472781e-02	-0.005747126	0.04837436	3.072056e-02	1.911501e-01				FALSE
Slc17a7	-2.946224e-02	-0.005747126	0.04714288	6.925346e-01	8.426047e-01				FALSE
Slc17a8	-2.034627e-02	-0.005747126	0.04586342	6.248780e-01	8.398361e-01				FALSE
Slc18a2	1.670534e-02	-0.005747126	0.04869838	3.223808e-01	6.686417e-01				FALSE
Slco1a4	3.547081e-02	-0.005747126	0.04877417	1.990339e-01	5.360466e-01				FALSE
Sox4	6.503757e-02	-0.005747126	0.04892211	7.396449e-02	3.451676e-01				FALSE
Sox6	-3.020666e-02	-0.005747126	0.04789827	6.952040e-01	8.426047e-01				FALSE
Sox8	7.475362e-02	-0.005747126	0.04872305	4.924579e-02	2.548566e-01				FALSE
Sp9	4.598714e-02	-0.005747126	0.04797246	1.404241e-01	4.625734e-01				FALSE
Synpr	-2.473156e-02	-0.005747126	0.04832358	6.527888e-01	8.426047e-01				FALSE
Syt2	5.304695e-02	-0.005747126	0.04837892	1.121291e-01	4.062807e-01				FALSE
Syt4	5.935205e-02	-0.005747126	0.04826496	8.870260e-02	3.821035e-01				FALSE
Sytl4	3.546222e-02	-0.005747126	0.04856621	1.980745e-01	5.360466e-01				FALSE
Tacr1	-7.839467e-02	-0.005747126	0.04877535	9.318131e-01	9.603964e-01				FALSE
Tacr3	4.985793e-02	-0.005747126	0.04877680	1.271452e-01	4.359265e-01				FALSE
Tiparp	-7.364941e-02	-0.005747126	0.04861488	9.187539e-01	9.598960e-01				FALSE
Tmem108	-1.480795e-02	-0.005747126	0.04895504	5.734187e-01	8.137662e-01				FALSE
Traf4	2.739066e-02	-0.005747126	0.04886486	2.488378e-01	5.656346e-01				FALSE
Trhr	-5.301602e-02	-0.005747126	0.04801092	8.375761e-01	9.257420e-01				FALSE
Ttn	-6.921135e-02	-0.005747126	0.04782494	9.077475e-01	9.598960e-01				FALSE
Ttyh2	-5.026121e-02	-0.005747126	0.04735072	8.264151e-01	9.255849e-01				FALSE
Blank-1	-6.607022e-03	-0.005747126	0.04849426	5.070736e-01	7.832817e-01				FALSE
Blank-2	3.049221e-02	-0.005747126	0.04629889	2.168941e-01	5.360466e-01				FALSE
Blank-3	-2.255466e-02	-0.005747126	0.04779947	6.374406e-01	8.426047e-01				FALSE
Blank-4	5.210554e-02	-0.005747126	0.04697726	1.090673e-01	4.062807e-01				FALSE
Blank-5	3.172303e-02	-0.005747126	0.04874973	2.210586e-01	5.382296e-01				FALSE
Oxt	2.166934e-02	-0.005747126	0.02807503	1.643978e-01	5.141659e-01				FALSE
Penk	-2.572390e-02	-0.005747126	0.04795092	6.615177e-01	8.426047e-01				FALSE
Sst	-2.226988e-02	-0.005747126	0.04879063	6.325618e-01	8.426047e-01				FALSE
Tac1	5.265462e-02	-0.005747126	0.04806296	1.121622e-01	4.062807e-01				FALSE
Gal	9.605166e-02	-0.005747126	0.04361031	9.790456e-03	8.223983e-02				FALSE
Cartpt	6.193581e-02	-0.005747126	0.04810492	7.971579e-02	3.524277e-01				FALSE
Npas4	-1.628004e-02	-0.005747126	0.04841874	5.861054e-01	8.137662e-01				FALSE
Vgf	-5.036481e-02	-0.005747126	0.04800555	8.236662e-01	9.255849e-01				FALSE
Scg2	2.004962e-02	-0.005747126	0.04865534	2.979889e-01	6.501576e-01				FALSE
Gnrh1	6.235799e-05	-0.005747126	0.04791909	4.517523e-01	7.832817e-01				FALSE
Vip	8.858356e-02	-0.005747126	0.03950652	8.476527e-03	7.495034e-02				FALSE
Egr1	-1.433070e-02	-0.005747126	0.04157462	5.817849e-01	8.137662e-01				FALSE
Tac2	5.293496e-02	-0.005747126	0.04860679	1.136619e-01	4.062807e-01				FALSE
Cck	4.033282e-02	-0.005747126	0.04796033	1.683281e-01	5.141659e-01				FALSE
Crh	5.700735e-02	-0.005747126	0.04808084	9.591463e-02	3.930161e-01				FALSE
Ucn3	1.028350e-01	-0.005747126	0.04885976	1.313077e-02	1.002713e-01				FALSE
Adcyap1	-1.813158e-02	-0.005747126	0.04790655	6.019944e-01	8.194703e-01				FALSE
Nnat	3.237273e-02	-0.005747126	0.04871777	2.169713e-01	5.360466e-01				FALSE
Fos	8.146544e-02	-0.005747126	0.04880770	3.697998e-02	2.218799e-01				FALSE
Th	-7.997269e-03	-0.005747126	0.04724910	5.189916e-01	7.832817e-01				FALSE
polyT	-6.368575e-02	-0.005747126	0.04861893	8.833083e-01	9.451961e-01				FALSE
DAPI	2.547438e-03	-0.005747126	0.04765109	4.309057e-01	7.787769e-01				FALSE

[truncated: 43 more sheets: mPOA_Excitatory-E-14FN7_9, mPOA_Excitatory-E-15FN7_9, mPOA_Excitatory-E-16FN7_9, mPOA_Excitatory-E-17FN7_9, mPOA_Excitatory-E-18FN7_9, mPOA_Excitatory-E-19FN7_9, mPOA_Excitatory-EFN7_3, mPOA_Excitatory-E3FN7_9, mPOA_Excitatory-E4FN7_9, mPOA_Excitatory-E-3FN7_3, mPOA_Excitatory-E-4FN7_3, mPOA_Excitatory-E-6FN7_3, mPOA_Excitatory-E-7FN7_9, mPOA_Excitatory-E-8FN7_9, mPOA_Excitatory-E-9FN7_9, mPOA_Inhibitory-I-1FN7_3, mPOA_Inhibitory-I-10FN7_3, mPOA_Inhibitory-I-11FN7_9, mPOA_Inhibitory-I-12FN7_9, mPOA_Inhibitory-I-13FN7_9 …]
