# Supplementary figures and images for: Characterizing spatial gene expression heterogeneity in spatially resolved single-cell transcriptomic data with nonuniform cellular densities
Source: HighWire-hosted journal article supplement (doi:10.1101/gr.271288.120), 2021-05-25

# Adjacency Weight Matrix Between Cell-Types

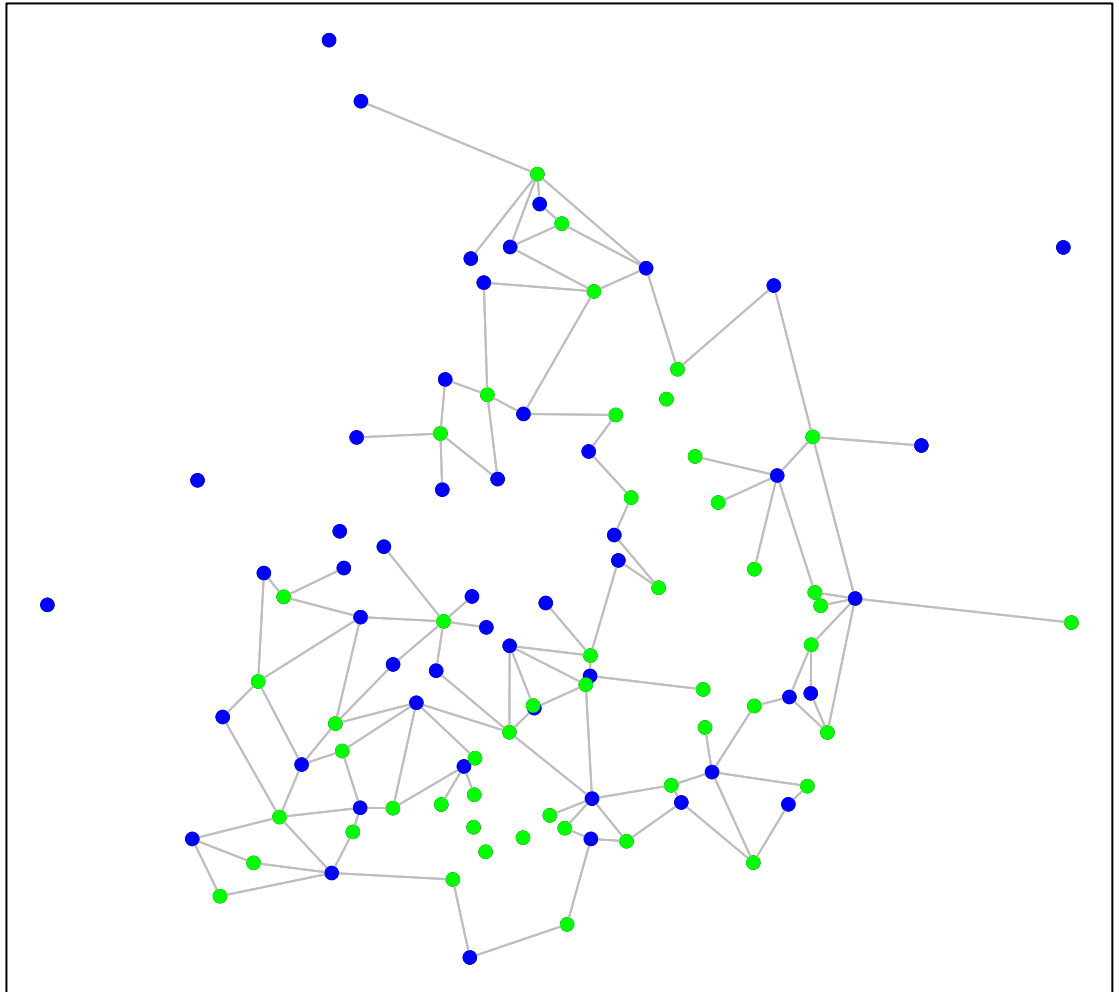

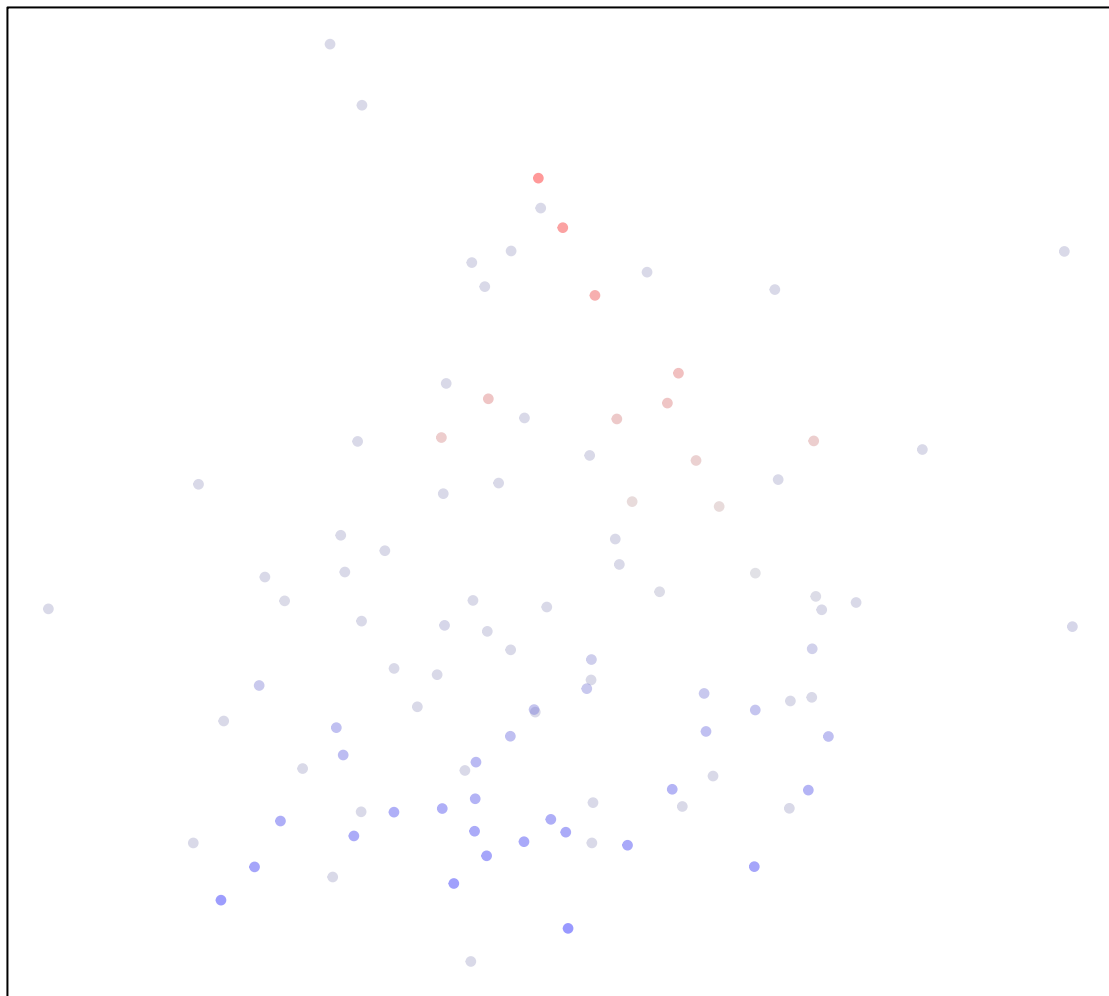

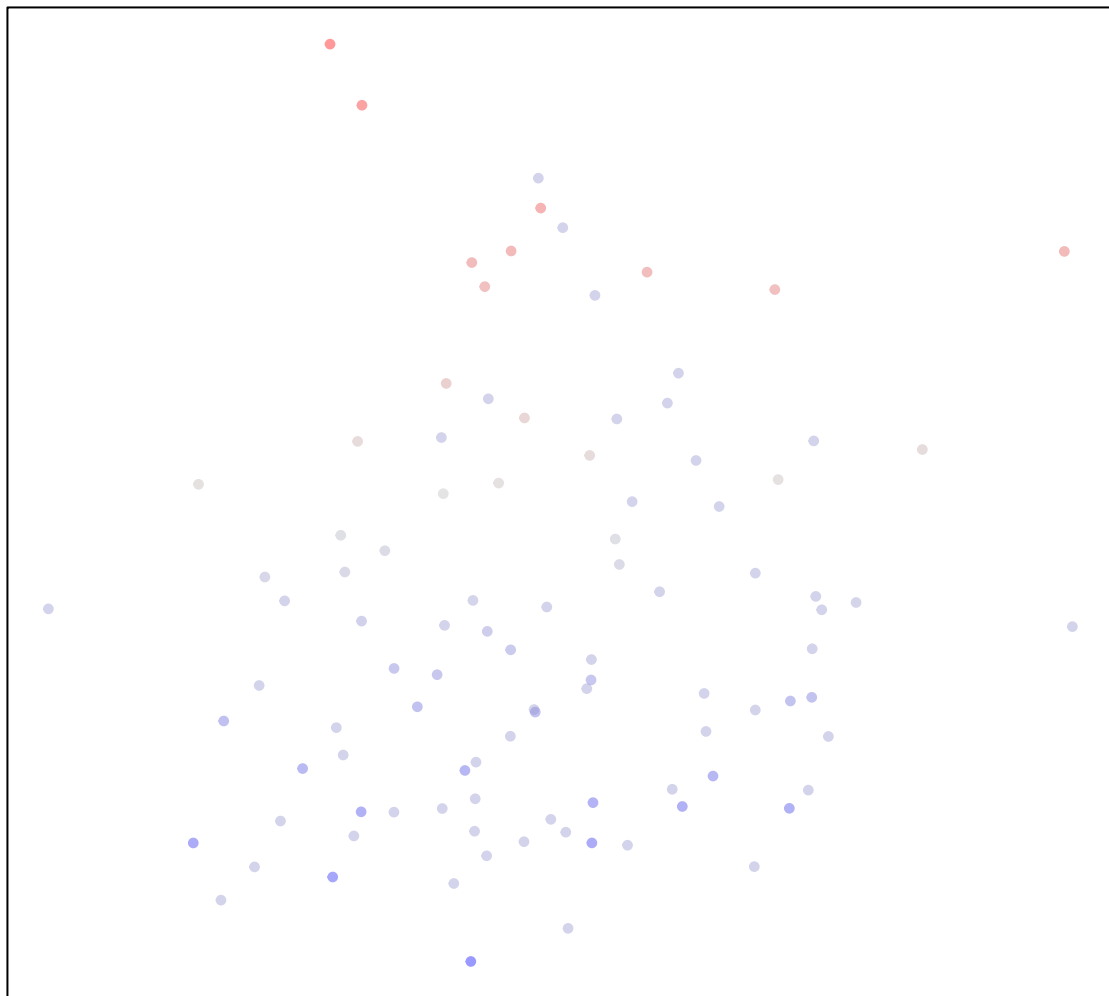

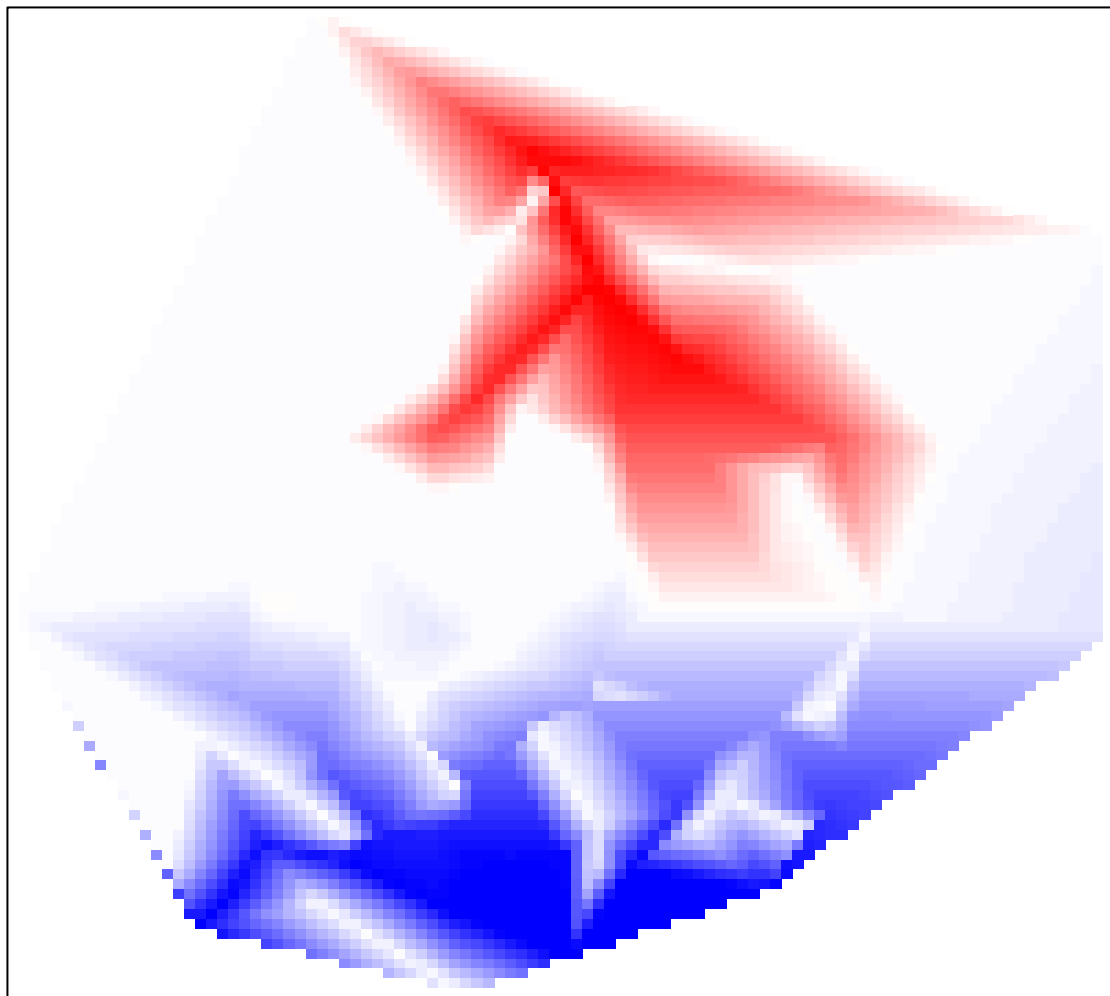

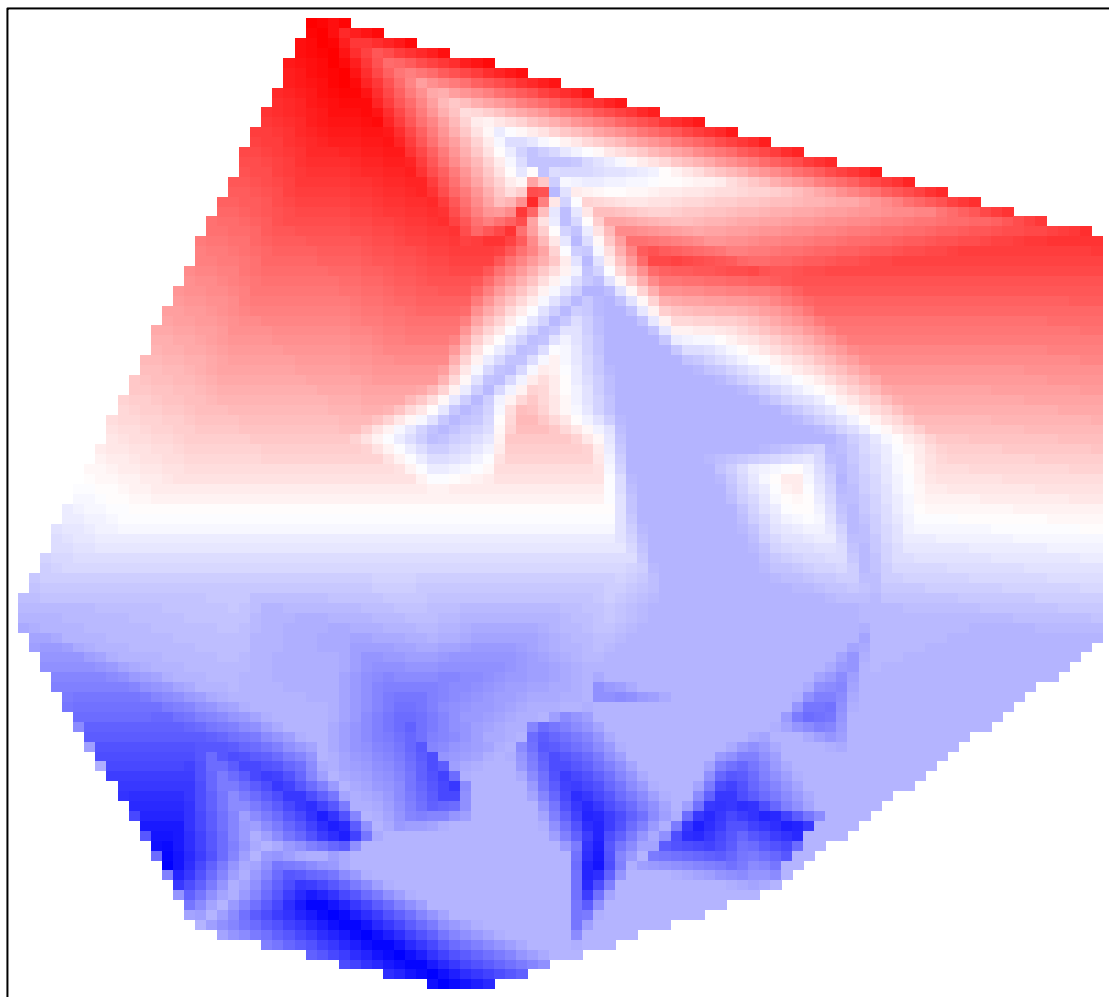

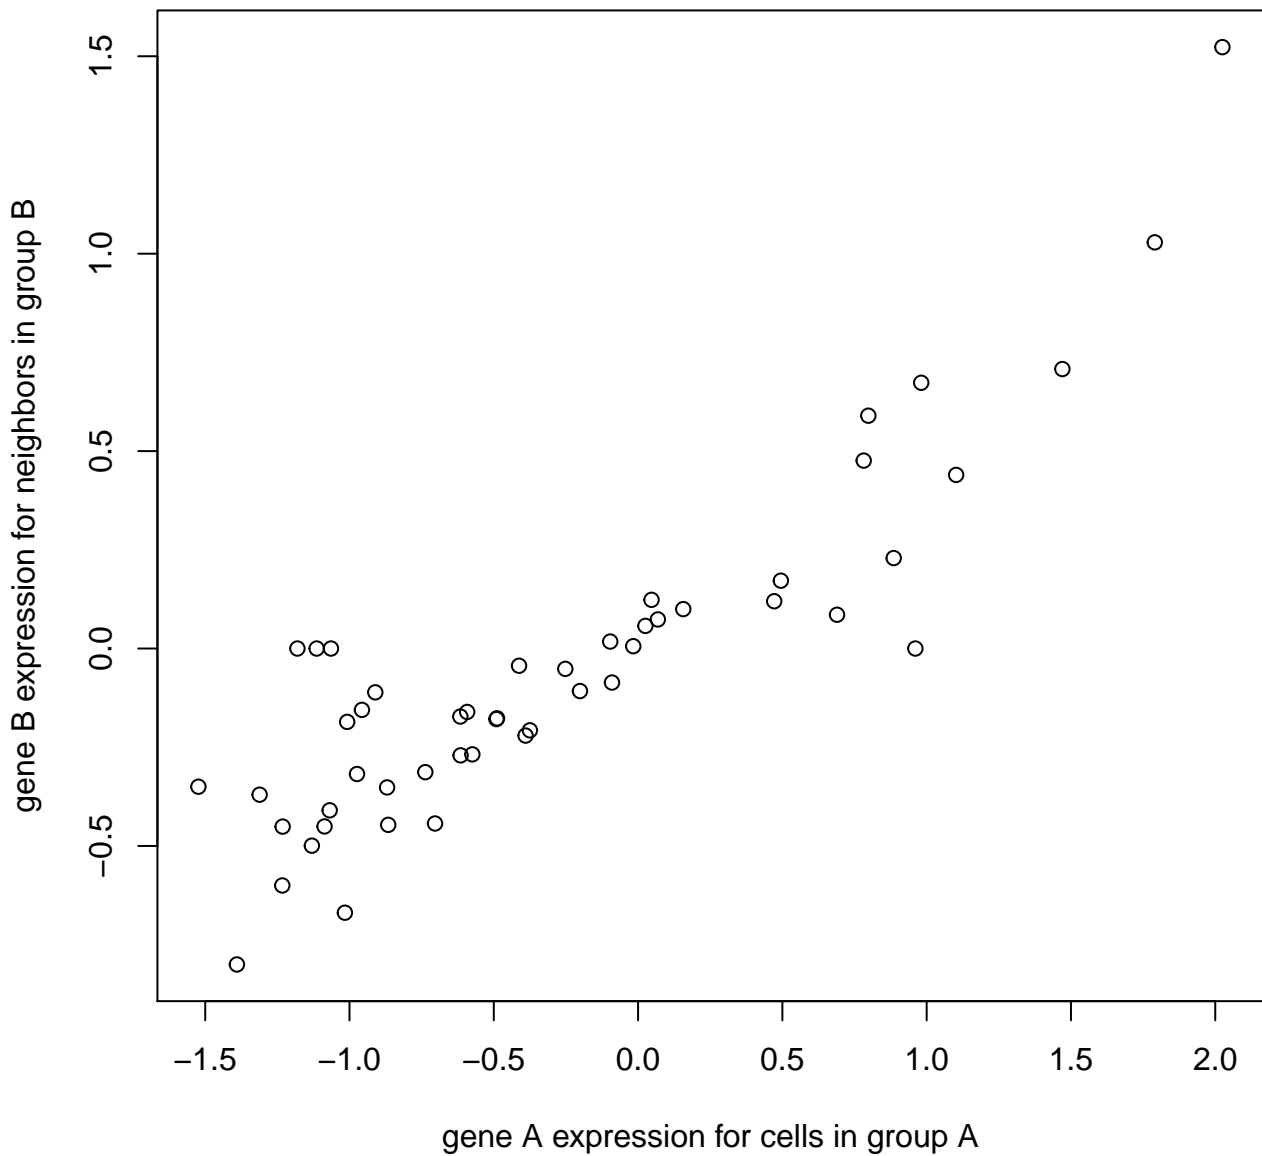

**Histogram of nullmodel**

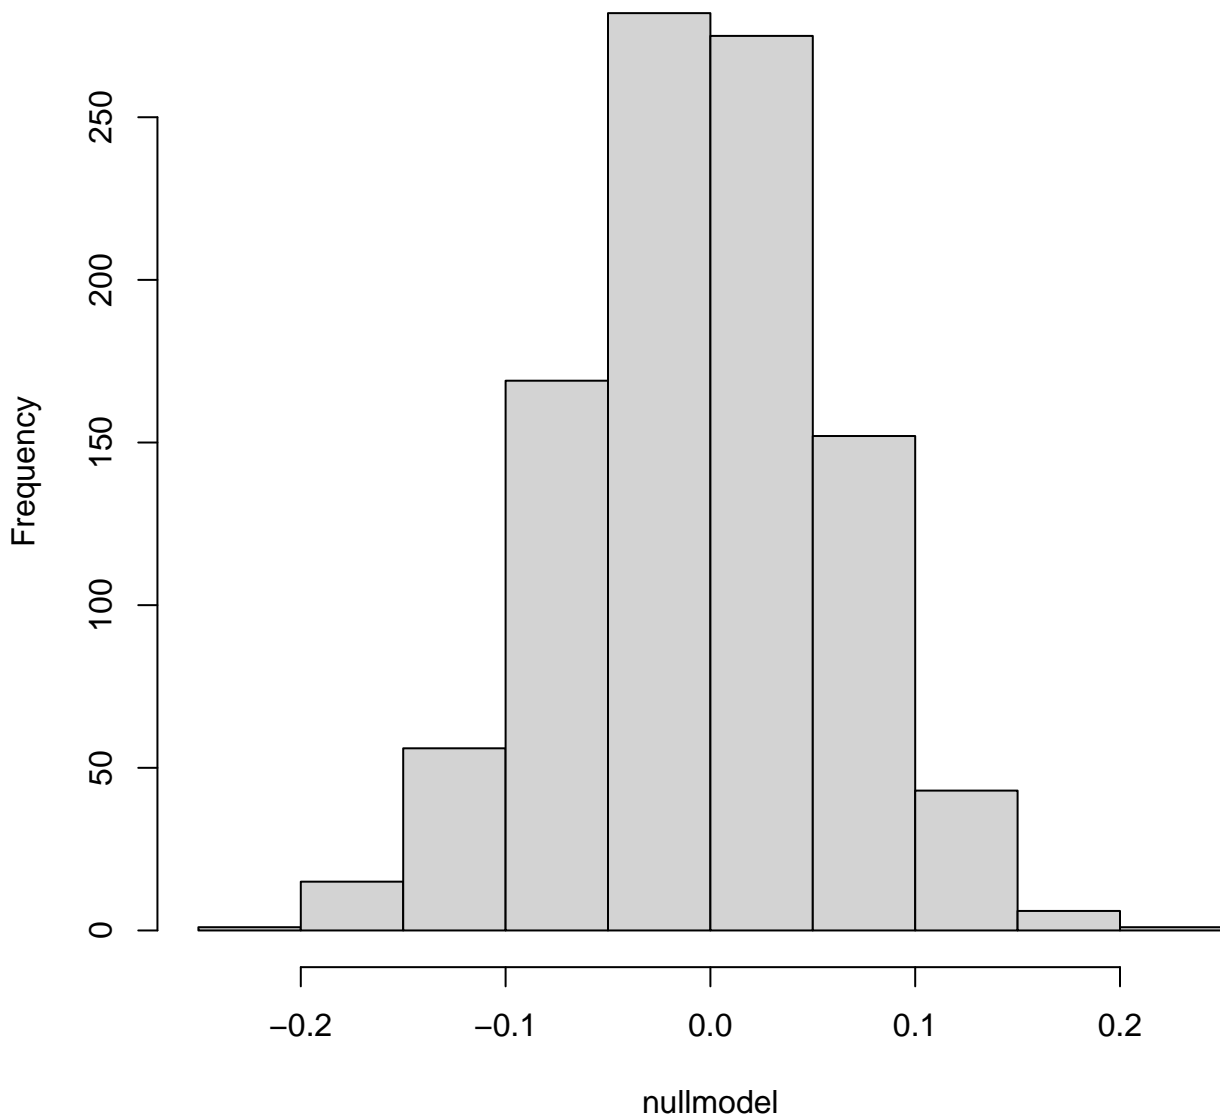

Supplement: Supplemental_Software_MERINGUE_1.0.tar.gz [file Rplots.pdf › MERINGUE/tests/testthat/Rplots.pdf]
